# Supplementary material
Source: publisher figshare collection journal article supplement (https://acs.figshare.com/ndownloader/files/4080628)
Supplement: Supplementary file 1 [file 4080628]

data_global
# 1. SUBMISSION DETAILS
_publ_contact_letter
;
     Please consider this CIF submission for publication 
     in ACS Inorganic Chemistry
; 
_publ_contact_author                          
;
Sylviane Sabo-Etienne
;
_publ_contact_author_address 
;
Laboratoire de Chimie de Coordination
205 Route de Narbonne
31077 Toulouse Cedex 04
;
_publ_contact_author_email                    
'Sylviane.Sabo@lcc-toulouse.fr'

_publ_requested_journal  'ACS Inorganic Chemistry'

#=============================================================================
# 2. TITLE AND AUTHOR LIST
_publ_section_title
;Step by Step Introduction of Silazane Moieties at Ruthenium; 
Tuning the Multicentre Nature of ?Ru-H-Si? Interactions
;
loop_
_publ_author_name
_publ_author_address
'Katharine A. SMART'
;
Laboratoire de Chimie de Coordination
UPR-CNRS 8241
205, route de Narbonne
31077 Toulouse cedex, France 
;
'Mary GRELLIER *'
;
Laboratoire de Chimie de Coordination
UPR-CNRS 8241
205, route de Narbonne
31077 Toulouse cedex, France 
;
'Laure Vendier'
;
Laboratoire de Chimie de Coordination
UPR-CNRS 8241
205, route de Narbonne
31077 Toulouse cedex, France 
;
'Sax A. MASON'
;
Institut Laue-Langevin
6 rue Jules Horowitz, BP 156
38042 Grenoble Cedex 9, France 
;
'Silvia C. CAPELLI'
;
Institut Laue-Langevin
6 rue Jules Horowitz, BP 156
38042 Grenoble Cedex 9, France 
;
'Alberto ALBINATI'
;
Dipartimento di Chimica
Universit\`a di Milano
Via C. Golgi, 19
20133 Milan, Italy
;
'Sylviane SABO-ETIENNE *'
;
Laboratoire de Chimie de Coordination
UPR-CNRS 8241
205, route de Narbonne
31077 Toulouse cedex, France 
;
#==============================================================================
_publ_section_references 
;
Altomare, A., Cascarano, G., Giacovazzo, G., Guagliardi, A., Burla, M.C., 
Polidori, G. and Camalli, M. (1994)., SIR92 program for automatic
solution of crystal structures by direct methods. J. Appl. Cryst. 27, 435.

Sheldrick, G. M. (1997). SHELXL97. Program for the refinement
of Crystal Structures. University of Gottingen, Germany.  

MULTI SCAN - c.f. r.h. blessing, acta cryst. (1995), a51, 33-38
     
WINGX - 1.63 Integrated System 
of Windows Programs 
for the Solution, Refinement and Analysis 
of Single Crystal X-Ray Diffraction Data. 
Farrugia, L. J. Appl. Crystallogr., 1999, 32, 837.

ORTEP3 for Windows, Farrugia, L. J. J. Appl. Crystallogr. 1997, 30, 565.;
;
#------------------  SECTION 2. COMPOUND(S) DETAILS -------------------------#
 
data_KSO231110
#----------------------------------------------------------------------------#
#                   CHEMICAL INFORMATION                                     #
#----------------------------------------------------------------------------#
 
_chemical_name_systematic
;
 ?
;
_chemical_formula_moiety                'C32 H56 N8 Ru2 Si4 '
_chemical_formula_sum                   'C32 H56 N8 Ru2 Si4 '
_chemical_formula_weight      867.35
_chemical_compound_source               'synthesis as described'
_chemical_absolute_configuration        unk
 
#----------------------------------------------------------------------------#
#                   UNIT CELL INFORMATION                                    #
#----------------------------------------------------------------------------#
 
_symmetry_cell_setting                  tetragonal
_symmetry_space_group_name_H-M          'P 42 21 2'
_symmetry_space_group_name_Hall         'P 4n 2n'
_symmetry_Int_Tables_number             94
loop_
    _symmetry_equiv_pos_as_xyz
'x, y, z'
'-x, -y, z'
'x+1/2, -y+1/2, -z+1/2'
'-x+1/2, y+1/2, -z+1/2'
'-y, -x, -z'
'y, x, -z'
'y+1/2, -x+1/2, z+1/2'
'-y+1/2, x+1/2, z+1/2'
 
_cell_length_a                          12.5360(2)
_cell_length_b                          12.5360(2)
_cell_length_c                          12.8809(2)
_cell_angle_alpha                       90
_cell_angle_beta                        90
_cell_angle_gamma                       90
_cell_volume                            2024.25(6)
_cell_formula_units_Z                   2
_cell_measurement_temperature           100(2)
_cell_measurement_reflns_used           7958
_cell_measurement_theta_min             3.5494
_cell_measurement_theta_max             29.1144
_cell_measurement_wavelength            0.71073
 
#----------------------------------------------------------------------------#
#                   CRYSTAL INFORMATION                                      #
#----------------------------------------------------------------------------#
 
_exptl_crystal_description              plate
_exptl_crystal_colour                   'red orange'
_exptl_crystal_size_max                 0.18
_exptl_crystal_size_mid                 0.1
_exptl_crystal_size_min                 0.03
_exptl_crystal_density_diffrn           1.423
_exptl_crystal_density_method           'not measured'
_exptl_crystal_F_000                    896
_exptl_special_details
;
 ?
;
 
#----------------------------------------------------------------------------#
#                   ABSORPTION CORRECTION                                    #
#----------------------------------------------------------------------------#
 
_exptl_absorpt_coefficient_mu           0.897
_exptl_absorpt_correction_type          multi-scan
_exptl_absorpt_process_details
;
        CrysAlisPro, Oxford Diffraction Ltd.,
        Version 1.171.33.66 (release 28-04-2010 CrysAlis171 .NET)
        (compiled Apr 28 2010,14:27:37)
        Empirical absorption correction using spherical harmonics,
 implemented in SCALE3 ABSPACK scaling algorithm.
;
_exptl_absorpt_correction_T_min         0.885
_exptl_absorpt_correction_T_max         0.997
 
#----------------------------------------------------------------------------#
#                   DATA COLLECTION                                          #
#----------------------------------------------------------------------------#
 
_diffrn_ambient_temperature             100(2)
_diffrn_radiation_wavelength            0.71073
_diffrn_radiation_type                  MoK\a
_diffrn_radiation_monochromator         graphite
_diffrn_radiation_probe                 x-ray
_diffrn_measurement_device_type         'Xcalibur, Eos, Gemini ultra'
_diffrn_measurement_method              '\w scans'
_diffrn_detector_area_resol_mean        16.1978
_diffrn_orient_matrix_ub_11             0.0487451
_diffrn_orient_matrix_ub_12             0.0007624
_diffrn_orient_matrix_ub_13             -0.0279843
_diffrn_orient_matrix_ub_21             0.0142121
_diffrn_orient_matrix_ub_22             -0.0498675
_diffrn_orient_matrix_ub_23             0.0220649
_diffrn_orient_matrix_ub_31             -0.0250137
_diffrn_orient_matrix_ub_32             -0.0267583
_diffrn_orient_matrix_ub_33             -0.0419314
_diffrn_reflns_av_R_equivalents         0.0244
_diffrn_reflns_av_unetI/netI            0.0201
_diffrn_reflns_number                   11004
_diffrn_reflns_limit_h_min              -15
_diffrn_reflns_limit_h_max              15
_diffrn_reflns_limit_k_min              -13
_diffrn_reflns_limit_k_max              15
_diffrn_reflns_limit_l_min              -16
_diffrn_reflns_limit_l_max              16
_diffrn_reflns_theta_min                3.56
_diffrn_reflns_theta_max                26.36
_diffrn_reflns_theta_full               26.36
_diffrn_measured_fraction_theta_full
                                        0.996
_diffrn_measured_fraction_theta_max
                                        0.996
_reflns_number_total                    2076
_reflns_number_gt                       1895
_reflns_threshold_expression            >2\s(I)
 
#----------------------------------------------------------------------------#
#                   COMPUTER PROGRAMS USED                                   #
#----------------------------------------------------------------------------#
 
_computing_data_collection
;
        CrysAlisPro, Oxford Diffraction Ltd.,
        Version 1.171.33.66 (release 28-04-2010 CrysAlis171 .NET)
        (compiled Apr 28 2010,14:27:37)
;
_computing_cell_refinement
;
        CrysAlisPro, Oxford Diffraction Ltd.,
        Version 1.171.33.66 (release 28-04-2010 CrysAlis171 .NET)
        (compiled Apr 28 2010,14:27:37)
;
_computing_data_reduction
;
        CrysAlisPro, Oxford Diffraction Ltd.,
        Version 1.171.33.66 (release 28-04-2010 CrysAlis171 .NET)
        (compiled Apr 28 2010,14:27:37)
;
_computing_structure_solution           'SIR92 (Giacovazzo et al, 1993)'
_computing_structure_refinement         'SHELXL-97 (Sheldrick, 2008)'
_computing_molecular_graphics           'Ortep-3 for Windows (Farrugia, 1997)'
_computing_publication_material
                                   'WinGX publication routines (Farrugia, 1999)'
 
#----------------------------------------------------------------------------#
#                   STRUCTURE SOLUTION
#----------------------------------------------------------------------------#
 
_atom_sites_solution_primary            direct
_atom_sites_solution_secondary          difmap
_atom_sites_solution_hydrogens          geom
 
#----------------------------------------------------------------------------#
#                   REFINEMENT INFORMATION                                   #
#----------------------------------------------------------------------------#
 
_refine_special_details
;
 Refinement of F^2^ against ALL reflections.  The weighted R-factor wR and
 goodness of fit S are based on F^2^, conventional R-factors R are based
 on F, with F set to zero for negative F^2^. The threshold expression of
 F^2^ > 2\s(F^2^) is used only for calculating R-factors(gt) etc. and is
 not relevant to the choice of reflections for refinement.  R-factors based
 on F^2^ are statistically about twice as large as those based on F, and R-
 factors based on ALL data will be even larger.
 The Flack parameter was not given because the structure presents a 
 racemic twin. The value of the refined basf with shelxl-97 is 0.4354.
;
_refine_ls_structure_factor_coef        Fsqd
_refine_ls_matrix_type                  full
_refine_ls_weighting_scheme             calc
_refine_ls_weighting_details
         'calc w=1/[\s^2^(Fo^2^)+(0.0224P)^2^+0.0000P] where P=(Fo^2^+2Fc^2^)/3'
_refine_ls_hydrogen_treatment           mixed
_refine_ls_extinction_method            none
_refine_ls_number_reflns                2076
_refine_ls_number_parameters            113
_refine_ls_number_restraints            0
_refine_ls_R_factor_all                 0.0188
_refine_ls_R_factor_gt                  0.0156
_refine_ls_wR_factor_ref                0.0356
_refine_ls_wR_factor_gt                 0.0352
_refine_ls_goodness_of_fit_ref          0.992
_refine_ls_restrained_S_all             0.992
_refine_ls_shift/su_max                 0
_refine_ls_shift/su_mean                0
_refine_diff_density_max                0.329
_refine_diff_density_min                -0.176
_refine_diff_density_rms                0.045
 
#----------------------------------------------------------------------------#
#                   ATOMIC TYPES, COORDINATES AND THERMAL PARAMETERS         #
#----------------------------------------------------------------------------#
 
loop_
    _atom_type_symbol
    _atom_type_description
    _atom_type_scat_dispersion_real
    _atom_type_scat_dispersion_imag
    _atom_type_scat_source
C C 0.0033 0.0016 'International Tables Vol C Tables 4.2.6.8 and 6.1.1.4'
H H 0 0 'International Tables Vol C Tables 4.2.6.8 and 6.1.1.4'
N N 0.0061 0.0033 'International Tables Vol C Tables 4.2.6.8 and 6.1.1.4'
Si Si 0.0817 0.0704 'International Tables Vol C Tables 4.2.6.8 and 6.1.1.4'
Ru Ru -1.2594 0.8363 'International Tables Vol C Tables 4.2.6.8 and 6.1.1.4'
 
loop_
    _atom_site_label
    _atom_site_type_symbol
    _atom_site_fract_x
    _atom_site_fract_y
    _atom_site_fract_z
    _atom_site_U_iso_or_equiv
    _atom_site_adp_type
    _atom_site_occupancy
    _atom_site_symmetry_multiplicity
    _atom_site_calc_flag
    _atom_site_refinement_flags
    _atom_site_disorder_assembly
    _atom_site_disorder_group
C1 C 0.15942(14) 0.10791(14) 0.72318(15) 0.0139(4) Uani 1 1 d . . .
C2 C 0.15072(18) 0.13282(17) 0.82998(13) 0.0209(5) Uani 1 1 d . . .
H2 H 0.2129 0.1343 0.8721 0.025 Uiso 1 1 calc R . .
C3 C 0.05314(17) 0.15481(17) 0.87303(15) 0.0244(5) Uani 1 1 d . . .
H3 H 0.0474 0.1716 0.9447 0.029 Uiso 1 1 calc R . .
C4 C -0.03731(16) 0.15234(16) 0.81077(15) 0.0199(4) Uani 1 1 d . . .
H4 H -0.1059 0.1664 0.839 0.024 Uiso 1 1 calc R . .
C5 C -0.02486(15) 0.12910(15) 0.70742(14) 0.0147(4) Uani 1 1 d . . .
H5 H -0.0868 0.1287 0.665 0.018 Uiso 1 1 calc R . .
C6 C 0.35037(15) 0.07868(18) 0.74092(15) 0.0237(4) Uani 1 1 d . . .
H6A H 0.3629 0.1479 0.7742 0.036 Uiso 1 1 calc R . .
H6B H 0.4119 0.0601 0.6976 0.036 Uiso 1 1 calc R . .
H6C H 0.3405 0.0239 0.7943 0.036 Uiso 1 1 calc R . .
C7 C 0.30641(15) -0.09380(16) 0.53892(17) 0.0237(4) Uani 1 1 d . . .
H7A H 0.3767 -0.0987 0.5719 0.036 Uiso 1 1 calc R . .
H7B H 0.3115 -0.1179 0.4667 0.036 Uiso 1 1 calc R . .
H7C H 0.2557 -0.139 0.5765 0.036 Uiso 1 1 calc R . .
C8 C 0.37249(15) 0.12377(17) 0.47921(15) 0.0268(5) Uani 1 1 d . . .
H8A H 0.364 0.2003 0.4922 0.04 Uiso 1 1 calc R . .
H8B H 0.372 0.1105 0.4042 0.04 Uiso 1 1 calc R . .
H8C H 0.4404 0.0995 0.5086 0.04 Uiso 1 1 calc R . .
N1 N 0.07033(11) 0.10665(10) 0.66177(11) 0.0128(4) Uani 1 1 d . . .
N2 N 0.25452(12) 0.08485(13) 0.67610(11) 0.0161(3) Uani 1 1 d . . .
Si1 Si 0.25901(4) 0.04867(4) 0.54205(4) 0.01407(11) Uani 1 1 d . . .
Ru1 Ru 0.081365(9) 0.081365(9) 0.5 0.00936(5) Uani 1 2 d S . .
HY1 H -0.0602(16) 0.0602(16) 0.5 0.032(8) Uiso 1 2 d S . .
HY2 H 0.1666(18) 0.1666(18) 0.5 0.049(9) Uiso 1 2 d S . .
 
loop_
    _atom_site_aniso_label
    _atom_site_aniso_U_11
    _atom_site_aniso_U_22
    _atom_site_aniso_U_33
    _atom_site_aniso_U_23
    _atom_site_aniso_U_13
    _atom_site_aniso_U_12
C1 0.0184(9) 0.0087(9) 0.0146(9) 0.0012(7) -0.0041(7) -0.0038(7)
C2 0.0259(12) 0.0232(12) 0.0135(8) -0.0019(9) -0.0055(9) -0.0028(9)
C3 0.0372(14) 0.0255(11) 0.0104(9) -0.0049(8) -0.0004(9) -0.0008(9)
C4 0.0227(11) 0.0214(11) 0.0156(9) -0.0032(8) 0.0044(8) 0.0017(8)
C5 0.0149(10) 0.0146(10) 0.0148(9) -0.0017(8) -0.0014(8) 0.0011(8)
C6 0.0200(10) 0.0311(12) 0.0200(10) 0.0024(10) -0.0096(8) -0.0011(10)
C7 0.0150(10) 0.0270(12) 0.0292(10) -0.0026(9) 0.0008(8) 0.0051(8)
C8 0.0146(9) 0.0391(12) 0.0266(15) 0.0090(9) 0.0001(8) -0.0042(9)
N1 0.0157(8) 0.0103(8) 0.0125(7) 0.0004(5) 0.0006(6) -0.0013(6)
N2 0.0139(7) 0.0195(8) 0.0148(7) 0.0015(7) -0.0038(6) -0.0014(7)
Si1 0.0111(3) 0.0178(3) 0.0133(2) 0.0008(2) -0.0007(2) -0.0003(2)
Ru1 0.01020(6) 0.01020(6) 0.00769(8) 0.00047(8) -0.00047(8) -0.00050(7)
 
 
#----------------------------------------------------------------------------#
#                   MOLECULAR GEOMETRY                                       #
#----------------------------------------------------------------------------#
 
_geom_special_details
;
 All s.u.'s (except the s.u. in the dihedral angle between two l.s. planes)
 are estimated using the full covariance matrix.  The cell s.u.'s are taken
 into account individually in the estimation of s.u.'s in distances, angles
 and torsion angles; correlations between s.u.'s in cell parameters are only
 used when they are defined by crystal symmetry.  An approximate (isotropic)
 treatment of cell s.u.'s is used for estimating s.u.'s involving l.s. planes.
;
loop_
    _geom_bond_atom_site_label_1
    _geom_bond_atom_site_label_2
    _geom_bond_distance
    _geom_bond_site_symmetry_2
    _geom_bond_publ_flag
C1 N2 1.368(2) . ?
C1 N1 1.369(2) . ?
C1 C2 1.415(2) . ?
C2 C3 1.371(3) . ?
C2 H2 0.95 . ?
C3 C4 1.389(3) . ?
C3 H3 0.95 . ?
C4 C5 1.372(3) . ?
C4 H4 0.95 . ?
C5 N1 1.360(2) . ?
C5 H5 0.95 . ?
C6 N2 1.465(2) . ?
C6 H6A 0.98 . ?
C6 H6B 0.98 . ?
C6 H6C 0.98 . ?
C7 Si1 1.883(2) . ?
C7 H7A 0.98 . ?
C7 H7B 0.98 . ?
C7 H7C 0.98 . ?
C8 Si1 1.8882(19) . ?
C8 H8A 0.98 . ?
C8 H8B 0.98 . ?
C8 H8C 0.98 . ?
N1 Ru1 2.1122(14) . ?
N2 Si1 1.7862(15) . ?
Si1 Ru1 2.3283(5) . ?
Si1 HY2 1.96(2) . ?
Ru1 N1 2.1122(14) 6_556 ?
Ru1 Si1 2.3283(5) 6_556 ?
Ru1 Ru1 2.8850(3) 2 ?
Ru1 HY1 1.795(17) . ?
Ru1 HY2 1.51(3) . ?
 
loop_
    _geom_angle_atom_site_label_1
    _geom_angle_atom_site_label_2
    _geom_angle_atom_site_label_3
    _geom_angle
    _geom_angle_site_symmetry_1
    _geom_angle_site_symmetry_3
    _geom_angle_publ_flag
N2 C1 N1 116.90(16) . . ?
N2 C1 C2 123.00(17) . . ?
N1 C1 C2 120.10(18) . . ?
C3 C2 C1 120.43(19) . . ?
C3 C2 H2 119.8 . . ?
C1 C2 H2 119.8 . . ?
C2 C3 C4 119.36(17) . . ?
C2 C3 H3 120.3 . . ?
C4 C3 H3 120.3 . . ?
C5 C4 C3 118.18(18) . . ?
C5 C4 H4 120.9 . . ?
C3 C4 H4 120.9 . . ?
N1 C5 C4 124.30(18) . . ?
N1 C5 H5 117.8 . . ?
C4 C5 H5 117.8 . . ?
N2 C6 H6A 109.5 . . ?
N2 C6 H6B 109.5 . . ?
H6A C6 H6B 109.5 . . ?
N2 C6 H6C 109.5 . . ?
H6A C6 H6C 109.5 . . ?
H6B C6 H6C 109.5 . . ?
Si1 C7 H7A 109.5 . . ?
Si1 C7 H7B 109.5 . . ?
H7A C7 H7B 109.5 . . ?
Si1 C7 H7C 109.5 . . ?
H7A C7 H7C 109.5 . . ?
H7B C7 H7C 109.5 . . ?
Si1 C8 H8A 109.5 . . ?
Si1 C8 H8B 109.5 . . ?
H8A C8 H8B 109.5 . . ?
Si1 C8 H8C 109.5 . . ?
H8A C8 H8C 109.5 . . ?
H8B C8 H8C 109.5 . . ?
C5 N1 C1 117.63(15) . . ?
C5 N1 Ru1 121.01(12) . . ?
C1 N1 Ru1 121.22(12) . . ?
C1 N2 C6 118.24(14) . . ?
C1 N2 Si1 120.63(12) . . ?
C6 N2 Si1 120.77(12) . . ?
N2 Si1 C7 105.76(9) . . ?
N2 Si1 C8 108.15(8) . . ?
C7 Si1 C8 103.06(9) . . ?
N2 Si1 Ru1 98.63(5) . . ?
C7 Si1 Ru1 117.64(6) . . ?
C8 Si1 Ru1 122.22(7) . . ?
N2 Si1 HY2 93.28(16) . . ?
C7 Si1 HY2 154.0(8) . . ?
C8 Si1 HY2 87.2(8) . . ?
N1 Ru1 N1 173.14(7) . 6_556 ?
N1 Ru1 Si1 81.93(4) . . ?
N1 Ru1 Si1 94.27(4) 6_556 . ?
N1 Ru1 Si1 94.27(4) . 6_556 ?
N1 Ru1 Si1 81.93(4) 6_556 6_556 ?
Si1 Ru1 Si1 113.01(3) . 6_556 ?
N1 Ru1 Ru1 93.43(4) . 2 ?
N1 Ru1 Ru1 93.43(4) 6_556 2 ?
Si1 Ru1 Ru1 123.494(13) . 2 ?
Si1 Ru1 Ru1 123.494(13) 6_556 2 ?
N1 Ru1 HY1 87.56(12) . . ?
N1 Ru1 HY1 97.98(7) 6_556 . ?
Si1 Ru1 HY1 156.9(6) . . ?
Si1 Ru1 HY1 88.1(7) 6_556 . ?
Ru1 Ru1 HY1 36.5(7) 2 . ?
N1 Ru1 HY2 86.57(13) . . ?
N1 Ru1 HY2 86.57(4) 6_556 . ?
Si1 Ru1 HY2 56.5(8) . . ?
Si1 Ru1 HY2 56.506(13) 6_556 . ?
Ru1 Ru1 HY2 180.0(12) 2 . ?
HY1 Ru1 HY2 143.5(7) . . ?
 
# The following lines are used to test the character set of files sent by
# network email or other means. They are not part of the CIF data set
# abcdefghijklmnopqrstuvwxyzABCDEFGHIJKLMNOPQRSTUVWXYZ0123456789
# !@#$%^&*()_+{}:"~<>?|\-=[];'`,./
 
# END
data_kso130111
 

#----------------------------------------------------------------------------#
#                   CHEMICAL INFORMATION                                     #
#----------------------------------------------------------------------------#
 
_chemical_name_systematic
;
 ?
;
_chemical_formula_moiety                'C24 H36 N2 Ru Si'
_chemical_formula_sum                   'C24 H36 N2 Ru Si'
_chemical_formula_weight                481.71
_chemical_compound_source               'synthesis as described'
 
#----------------------------------------------------------------------------#
#                   UNIT CELL INFORMATION                                    #
#----------------------------------------------------------------------------#
 
_symmetry_cell_setting                  monoclinic
_symmetry_space_group_name_H-M          'P 1 21/n 1'
_symmetry_space_group_name_Hall         '-P 2yn'
_symmetry_Int_Tables_number             14
loop_
    _symmetry_equiv_pos_as_xyz
'x, y, z'
'-x+1/2, y+1/2, -z+1/2'
'-x, -y, -z'
'x-1/2, -y-1/2, z-1/2'
 
_cell_length_a                          14.2470(10)
_cell_length_b                          16.0730(10)
_cell_length_c                          19.4300(10)
_cell_angle_alpha                       90
_cell_angle_beta                        101.564(10)
_cell_angle_gamma                       90
_cell_volume                            4359.0(5)
_cell_formula_units_Z                   8
_cell_measurement_temperature           100(2)
_cell_measurement_reflns_used           9611
_cell_measurement_theta_min             2.76
_cell_measurement_theta_max             33.63
_cell_measurement_wavelength            0.71073
 
#----------------------------------------------------------------------------#
#                   CRYSTAL INFORMATION                                      #
#----------------------------------------------------------------------------#
 
_exptl_crystal_description              platelet
_exptl_crystal_colour                   'light yellow'
_exptl_crystal_size_max                 0.12
_exptl_crystal_size_mid                 0.08
_exptl_crystal_size_min                 0.02
_exptl_crystal_density_diffrn           1.468
_exptl_crystal_density_method           'not measured'
_exptl_crystal_F_000                    2016
_exptl_special_details
;
 ?
;
 
#----------------------------------------------------------------------------#
#                   ABSORPTION CORRECTION                                    #
#----------------------------------------------------------------------------#
 
_exptl_absorpt_coefficient_mu           0.787
_exptl_absorpt_correction_type    multi-scan 
_exptl_absorpt_process_details
;
        [c.f. r.h. blessing, acta cryst. (1995), a51, 33-38]
;
_exptl_absorpt_correction_T_min   0.915
_exptl_absorpt_correction_T_max   0.985 
 
#----------------------------------------------------------------------------#
#                   DATA COLLECTION                                          #
#----------------------------------------------------------------------------#
 
_diffrn_ambient_temperature             100(2)
_diffrn_radiation_type            MoK\a
_diffrn_radiation_wavelength  0.71073
_diffrn_radiation_source          'fine-focus sealed tube'
_diffrn_radiation_monochromator   graphite
_diffrn_measurement_device_type   'Bruker Kappa APEX II'
_diffrn_measurement_method        \w-\f
_diffrn_standards_number          0
_diffrn_standards_interval_count  0
_diffrn_standards_interval_time   0
_diffrn_standards_decay_%         0
_diffrn_reflns_av_R_equivalents         0.0778
_diffrn_reflns_av_unetI/netI            0.1036
_diffrn_reflns_number                   72183
_diffrn_reflns_limit_h_min              -20
_diffrn_reflns_limit_h_max              22
_diffrn_reflns_limit_k_min              -25
_diffrn_reflns_limit_k_max              21
_diffrn_reflns_limit_l_min              -30
_diffrn_reflns_limit_l_max              30
_diffrn_reflns_theta_min                2.92
_diffrn_reflns_theta_max                34.21
_diffrn_reflns_theta_full               34.21
_diffrn_measured_fraction_theta_full
                                        0.974
_diffrn_measured_fraction_theta_max
                                        0.974
_reflns_number_total                    17633
_reflns_number_gt                       10205
_reflns_threshold_expression            >2\s(I)
 
#----------------------------------------------------------------------------#
#                   COMPUTER PROGRAMS USED                                   #
#----------------------------------------------------------------------------#
 
_computing_data_collection              'Bruker SMART'
_computing_cell_refinement              'Bruker SMART'
_computing_data_reduction               'Bruker SAINT'
_computing_structure_solution           'Bruker SHELXTL'
_computing_structure_refinement         'SHELXL-97 (Sheldrick, 2008)'
_computing_molecular_graphics           'Ortep-3 for Windows (Farrugia, 1997)'
_computing_publication_material
                                   'WinGX publication routines (Farrugia, 1999)'
 
#----------------------------------------------------------------------------#
#                   STRUCTURE SOLUTION
#----------------------------------------------------------------------------#
 
_atom_sites_solution_primary            direct
_atom_sites_solution_secondary          difmap
_atom_sites_solution_hydrogens          geom
 
#----------------------------------------------------------------------------#
#                   REFINEMENT INFORMATION                                   #
#----------------------------------------------------------------------------#
 
_refine_special_details
;
 Refinement of F^2^ against ALL reflections.  The weighted R-factor wR and
 goodness of fit S are based on F^2^, conventional R-factors R are based
 on F, with F set to zero for negative F^2^. The threshold expression of
 F^2^ > 2\s(F^2^) is used only for calculating R-factors(gt) etc. and is
 not relevant to the choice of reflections for refinement.  R-factors based
 on F^2^ are statistically about twice as large as those based on F, and R-
 factors based on ALL data will be even larger.
;
_refine_ls_structure_factor_coef        Fsqd
_refine_ls_matrix_type                  full
_refine_ls_weighting_scheme             calc
_refine_ls_weighting_details
         'calc w=1/[\s^2^(Fo^2^)+(0.0269P)^2^+0.1364P] where P=(Fo^2^+2Fc^2^)/3'
_refine_ls_hydrogen_treatment           constr
_refine_ls_extinction_method            none
_refine_ls_number_reflns                17633
_refine_ls_number_parameters            511
_refine_ls_number_restraints            0
_refine_ls_R_factor_all                 0.108
_refine_ls_R_factor_gt                  0.0424
_refine_ls_wR_factor_ref                0.0817
_refine_ls_wR_factor_gt                 0.068
_refine_ls_goodness_of_fit_ref          0.986
_refine_ls_restrained_S_all             0.986
_refine_ls_shift/su_max                 0.003
_refine_ls_shift/su_mean                0
_refine_diff_density_max                0.658
_refine_diff_density_min                -0.672
_refine_diff_density_rms                0.146
 
#----------------------------------------------------------------------------#
#                   ATOMIC TYPES, COORDINATES AND THERMAL PARAMETERS         #
#----------------------------------------------------------------------------#
 
loop_
    _atom_type_symbol
    _atom_type_description
    _atom_type_scat_dispersion_real
    _atom_type_scat_dispersion_imag
    _atom_type_scat_source
C C 0.0033 0.0016 'International Tables Vol C Tables 4.2.6.8 and 6.1.1.4'
H H 0 0 'International Tables Vol C Tables 4.2.6.8 and 6.1.1.4'
Si Si 0.0817 0.0704 'International Tables Vol C Tables 4.2.6.8 and 6.1.1.4'
Ru Ru -1.2594 0.8363 'International Tables Vol C Tables 4.2.6.8 and 6.1.1.4'
N N 0.0061 0.0033 'International Tables Vol C Tables 4.2.6.8 and 6.1.1.4'
 
loop_
    _atom_site_label
    _atom_site_type_symbol
    _atom_site_fract_x
    _atom_site_fract_y
    _atom_site_fract_z
    _atom_site_U_iso_or_equiv
    _atom_site_adp_type
    _atom_site_occupancy
    _atom_site_symmetry_multiplicity
    _atom_site_calc_flag
    _atom_site_refinement_flags
    _atom_site_disorder_assembly
    _atom_site_disorder_group
C1 C 0.48284(18) 0.86310(15) 0.72643(14) 0.0178(5) Uani 1 1 d . . .
H1A H 0.4843 0.9015 0.6875 0.027 Uiso 1 1 calc R . .
H1B H 0.4702 0.8943 0.7669 0.027 Uiso 1 1 calc R . .
H1C H 0.4321 0.8218 0.7119 0.027 Uiso 1 1 calc R . .
C2 C 0.68789(19) 0.89810(14) 0.78128(13) 0.0171(5) Uani 1 1 d . . .
H2A H 0.7524 0.8837 0.7748 0.026 Uiso 1 1 calc R . .
H2B H 0.6896 0.9097 0.831 0.026 Uiso 1 1 calc R . .
H2C H 0.6653 0.9476 0.7533 0.026 Uiso 1 1 calc R . .
C3 C 0.60975(17) 0.55933(14) 0.67790(12) 0.0129(5) Uani 1 1 d . . .
H3 H 0.6066 0.5194 0.7134 0.015 Uiso 1 1 calc R . .
C4 C 0.60983(18) 0.53073(15) 0.61147(12) 0.0148(5) Uani 1 1 d . . .
H4 H 0.6066 0.4729 0.6013 0.018 Uiso 1 1 calc R . .
C5 C 0.61486(18) 0.58894(15) 0.55926(13) 0.0156(5) Uani 1 1 d . . .
H5 H 0.6153 0.5713 0.5127 0.019 Uiso 1 1 calc R . .
C6 C 0.61911(16) 0.67227(15) 0.57588(12) 0.0126(4) Uani 1 1 d . . .
H6 H 0.6222 0.7123 0.5404 0.015 Uiso 1 1 calc R . .
C7 C 0.61897(16) 0.69887(14) 0.64549(12) 0.0103(4) Uani 1 1 d . . .
C8 C 0.6294(2) 0.84315(14) 0.61172(13) 0.0182(6) Uani 1 1 d . . .
H8A H 0.6871 0.8342 0.5924 0.027 Uiso 1 1 calc R . .
H8B H 0.6318 0.8986 0.6329 0.027 Uiso 1 1 calc R . .
H8C H 0.5726 0.8388 0.5739 0.027 Uiso 1 1 calc R . .
C9 C 0.60527(17) 0.75720(14) 0.89458(12) 0.0120(5) Uani 1 1 d . . .
H9 H 0.6553 0.8009 0.909 0.014 Uiso 1 1 calc R . .
C10 C 0.63147(17) 0.67698(14) 0.92103(11) 0.0116(4) Uani 1 1 d . . .
H10 H 0.6974 0.6741 0.9508 0.014 Uiso 1 1 calc R . .
C11 C 0.56029(19) 0.61697(15) 0.94422(12) 0.0161(5) Uani 1 1 d . . .
H11A H 0.5093 0.6495 0.9597 0.019 Uiso 1 1 calc R . .
H11B H 0.594 0.5842 0.9849 0.019 Uiso 1 1 calc R . .
C12 C 0.5139(2) 0.55678(15) 0.88532(13) 0.0186(6) Uani 1 1 d . . .
H12A H 0.5516 0.5046 0.8894 0.022 Uiso 1 1 calc R . .
H12B H 0.4485 0.5427 0.8915 0.022 Uiso 1 1 calc R . .
C13 C 0.50831(18) 0.59336(14) 0.81233(12) 0.0130(5) Uani 1 1 d . . .
H13 H 0.4947 0.5514 0.7736 0.016 Uiso 1 1 calc R . .
C14 C 0.47247(16) 0.67383(15) 0.79263(12) 0.0122(4) Uani 1 1 d . . .
H14 H 0.4388 0.678 0.7424 0.015 Uiso 1 1 calc R . .
C15 C 0.42919(17) 0.72946(15) 0.84244(13) 0.0154(5) Uani 1 1 d . . .
H15A H 0.3997 0.6937 0.8738 0.018 Uiso 1 1 calc R . .
H15B H 0.3777 0.7638 0.8143 0.018 Uiso 1 1 calc R . .
C16 C 0.50311(18) 0.78748(15) 0.88781(13) 0.0154(5) Uani 1 1 d . . .
H16A H 0.4975 0.8438 0.8667 0.018 Uiso 1 1 calc R . .
H16B H 0.4881 0.792 0.9353 0.018 Uiso 1 1 calc R . .
C17 C 0.78639(17) 0.71223(14) 0.81864(12) 0.0117(5) Uani 1 1 d . . .
H17 H 0.798 0.7466 0.7783 0.014 Uiso 1 1 calc R . .
C18 C 0.77348(17) 0.62629(14) 0.80093(12) 0.0121(5) Uani 1 1 d . . .
H18 H 0.7838 0.609 0.7536 0.015 Uiso 1 1 calc R . .
C19 C 0.74479(18) 0.56388(15) 0.84368(13) 0.0145(5) Uani 1 1 d . . .
H19 H 0.7269 0.5101 0.8186 0.017 Uiso 1 1 calc R . .
C20 C 0.7855(2) 0.55383(15) 0.91941(13) 0.0194(6) Uani 1 1 d . . .
H20 H 0.7457 0.5295 0.9477 0.023 Uiso 1 1 calc R . .
C21 C 0.8732(2) 0.57610(16) 0.95097(14) 0.0217(6) Uani 1 1 d . . .
H21 H 0.8913 0.5656 1 0.026 Uiso 1 1 calc R . .
C22 C 0.94731(19) 0.61713(17) 0.91550(14) 0.0224(6) Uani 1 1 d . . .
H22A H 0.9394 0.5953 0.867 0.027 Uiso 1 1 calc R . .
H22B H 1.012 0.6011 0.9411 0.027 Uiso 1 1 calc R . .
C23 C 0.94125(18) 0.71285(17) 0.91223(14) 0.0202(6) Uani 1 1 d . . .
H23A H 0.9804 0.7332 0.879 0.024 Uiso 1 1 calc R . .
H23B H 0.9693 0.7356 0.9592 0.024 Uiso 1 1 calc R . .
C24 C 0.83826(17) 0.74643(15) 0.88917(12) 0.0149(5) Uani 1 1 d . . .
H24A H 0.8011 0.732 0.9254 0.018 Uiso 1 1 calc R . .
H24B H 0.8407 0.8079 0.8862 0.018 Uiso 1 1 calc R . .
C31 C -0.00857(18) 0.86599(14) 0.75847(13) 0.0153(5) Uani 1 1 d . . .
H31A H -0.051 0.8249 0.7737 0.023 Uiso 1 1 calc R . .
H31B H -0.0434 0.8957 0.7171 0.023 Uiso 1 1 calc R . .
H31C H 0.0133 0.9057 0.7965 0.023 Uiso 1 1 calc R . .
C32 C 0.16742(19) 0.89900(14) 0.70247(13) 0.0155(5) Uani 1 1 d . . .
H32A H 0.1612 0.9495 0.7295 0.023 Uiso 1 1 calc R . .
H32B H 0.1409 0.9091 0.6526 0.023 Uiso 1 1 calc R . .
H32C H 0.2353 0.884 0.7084 0.023 Uiso 1 1 calc R . .
C33 C 0.14910(18) 0.56741(14) 0.82008(13) 0.0129(5) Uani 1 1 d . . .
H33 H 0.1262 0.5252 0.7867 0.016 Uiso 1 1 calc R . .
C34 C 0.18833(18) 0.54307(15) 0.88745(12) 0.0148(5) Uani 1 1 d . . .
H34 H 0.1923 0.486 0.9003 0.018 Uiso 1 1 calc R . .
C35 C 0.22193(18) 0.60489(15) 0.93605(13) 0.0158(5) Uani 1 1 d . . .
H35 H 0.2501 0.5904 0.9831 0.019 Uiso 1 1 calc R . .
C36 C 0.21443(17) 0.68681(14) 0.91612(12) 0.0127(5) Uani 1 1 d . . .
H36 H 0.2366 0.7292 0.9495 0.015 Uiso 1 1 calc R . .
C37 C 0.17379(16) 0.70821(14) 0.84599(12) 0.0098(4) Uani 1 1 d . . .
C38 C 0.2000(2) 0.85466(14) 0.87287(13) 0.0179(5) Uani 1 1 d . . .
H38A H 0.1636 0.8525 0.9106 0.027 Uiso 1 1 calc R . .
H38B H 0.1902 0.9088 0.8493 0.027 Uiso 1 1 calc R . .
H38C H 0.2683 0.847 0.8928 0.027 Uiso 1 1 calc R . .
C39 C -0.05288(16) 0.67519(15) 0.69830(12) 0.0130(4) Uani 1 1 d . . .
H39 H -0.0602 0.6824 0.7481 0.016 Uiso 1 1 calc R . .
C40 C -0.02709(17) 0.59334(14) 0.68235(13) 0.0135(5) Uani 1 1 d . . .
H40 H -0.0202 0.5538 0.7228 0.016 Uiso 1 1 calc R . .
C41 C -0.05945(19) 0.55280(15) 0.61127(13) 0.0172(5) Uani 1 1 d . . .
H41A H -0.1286 0.5397 0.6043 0.021 Uiso 1 1 calc R . .
H41B H -0.0243 0.4998 0.6101 0.021 Uiso 1 1 calc R . .
C42 C -0.04204(18) 0.60929(15) 0.55091(12) 0.0155(5) Uani 1 1 d . . .
H42A H -0.029 0.5739 0.5122 0.019 Uiso 1 1 calc R . .
H42B H -0.1011 0.6413 0.5327 0.019 Uiso 1 1 calc R . .
C43 C 0.04105(17) 0.66999(14) 0.57254(11) 0.0114(4) Uani 1 1 d . . .
H43 H 0.0919 0.6649 0.544 0.014 Uiso 1 1 calc R . .
C44 C 0.02794(17) 0.75193(14) 0.59511(11) 0.0105(4) Uani 1 1 d . . .
H44 H 0.0709 0.7943 0.5799 0.013 Uiso 1 1 calc R . .
C45 C -0.07166(18) 0.78371(15) 0.59851(12) 0.0145(5) Uani 1 1 d . . .
H45A H -0.1113 0.7852 0.5504 0.017 Uiso 1 1 calc R . .
H45B H -0.0665 0.8413 0.617 0.017 Uiso 1 1 calc R . .
C46 C -0.12209(18) 0.72881(15) 0.64570(13) 0.0158(5) Uani 1 1 d . . .
H46A H -0.1586 0.7652 0.672 0.019 Uiso 1 1 calc R . .
H46B H -0.1685 0.6919 0.6154 0.019 Uiso 1 1 calc R . .
C47 C 0.24671(17) 0.71021(14) 0.67155(12) 0.0113(5) Uani 1 1 d . . .
H47 H 0.2799 0.7469 0.7104 0.014 Uiso 1 1 calc R . .
C48 C 0.24499(17) 0.62583(14) 0.69362(12) 0.0116(5) Uani 1 1 d . . .
H48 H 0.2817 0.6122 0.7417 0.014 Uiso 1 1 calc R . .
C49 C 0.19416(17) 0.56039(14) 0.65481(13) 0.0140(5) Uani 1 1 d . . .
H49 H 0.1911 0.5086 0.6828 0.017 Uiso 1 1 calc R . .
C50 C 0.19293(19) 0.54483(15) 0.57996(13) 0.0177(5) Uani 1 1 d . . .
H50 H 0.1382 0.5178 0.5534 0.021 Uiso 1 1 calc R . .
C51 C 0.2629(2) 0.56575(16) 0.54622(14) 0.0217(6) Uani 1 1 d . . .
H51 H 0.2532 0.5535 0.4975 0.026 Uiso 1 1 calc R . .
C52 C 0.35596(19) 0.60742(17) 0.57981(14) 0.0228(6) Uani 1 1 d . . .
H52A H 0.4062 0.5895 0.5544 0.027 Uiso 1 1 calc R . .
H52B H 0.3748 0.5873 0.6288 0.027 Uiso 1 1 calc R . .
C53 C 0.35375(18) 0.70299(16) 0.58086(13) 0.0202(6) Uani 1 1 d . . .
H53A H 0.3592 0.7239 0.5339 0.024 Uiso 1 1 calc R . .
H53B H 0.4103 0.7232 0.615 0.024 Uiso 1 1 calc R . .
C54 C 0.26274(17) 0.73969(15) 0.60030(12) 0.0138(5) Uani 1 1 d . . .
H54A H 0.2675 0.8011 0.6007 0.017 Uiso 1 1 calc R . .
H54B H 0.2066 0.7239 0.5638 0.017 Uiso 1 1 calc R . .
Si1 Si 0.60352(5) 0.80791(4) 0.75162(3) 0.01036(13) Uani 1 1 d . . .
Si2 Si 0.09950(5) 0.81057(4) 0.73519(3) 0.00970(13) Uani 1 1 d . . .
Ru1 Ru 0.629259(13) 0.675503(11) 0.807139(9) 0.00744(4) Uani 1 1 d . . .
Ru2 Ru 0.096705(12) 0.675054(11) 0.685594(9) 0.00701(4) Uani 1 1 d . . .
N1 N 0.61389(14) 0.64106(11) 0.69653(10) 0.0094(4) Uani 1 1 d . . .
N2 N 0.62450(15) 0.77977(11) 0.66559(10) 0.0122(4) Uani 1 1 d . . .
N3 N 0.14075(14) 0.64761(11) 0.79783(10) 0.0093(4) Uani 1 1 d . . .
N4 N 0.16713(15) 0.78837(11) 0.82192(10) 0.0112(4) Uani 1 1 d . . .
 
loop_
    _atom_site_aniso_label
    _atom_site_aniso_U_11
    _atom_site_aniso_U_22
    _atom_site_aniso_U_33
    _atom_site_aniso_U_23
    _atom_site_aniso_U_13
    _atom_site_aniso_U_12
C1 0.0157(14) 0.0147(12) 0.0215(13) 0.0015(10) 0.0000(11) 0.0035(10)
C2 0.0198(14) 0.0109(11) 0.0203(13) 0.0016(10) 0.0033(11) -0.0030(10)
C3 0.0152(13) 0.0099(11) 0.0138(12) 0.0000(9) 0.0034(10) 0.0003(9)
C4 0.0166(13) 0.0136(11) 0.0150(12) -0.0023(9) 0.0048(10) 0.0029(10)
C5 0.0143(13) 0.0212(13) 0.0113(12) -0.0025(10) 0.0025(10) 0.0030(10)
C6 0.0099(11) 0.0171(11) 0.0106(10) 0.0021(10) 0.0015(8) 0.0025(10)
C7 0.0053(11) 0.0131(11) 0.0116(11) 0.0009(9) -0.0006(9) -0.0006(8)
C8 0.0252(15) 0.0134(12) 0.0158(12) 0.0048(9) 0.0038(11) -0.0029(10)
C9 0.0121(12) 0.0129(11) 0.0105(11) -0.0038(9) 0.0011(9) -0.0006(9)
C10 0.0132(11) 0.0150(11) 0.0066(10) -0.0038(9) 0.0021(8) -0.0005(10)
C11 0.0205(14) 0.0176(12) 0.0112(12) 0.0006(9) 0.0059(10) -0.0026(10)
C12 0.0243(15) 0.0173(13) 0.0157(13) -0.0020(10) 0.0073(11) -0.0067(11)
C13 0.0159(13) 0.0138(12) 0.0109(11) -0.0040(9) 0.0061(10) -0.0074(9)
C14 0.0077(11) 0.0170(11) 0.0121(10) -0.0052(10) 0.0022(8) -0.0048(10)
C15 0.0096(12) 0.0233(13) 0.0144(12) -0.0057(10) 0.0050(10) 0.0005(10)
C16 0.0156(13) 0.0176(12) 0.0129(12) -0.0049(9) 0.0029(10) 0.0024(10)
C17 0.0092(12) 0.0144(11) 0.0119(11) 0.0005(9) 0.0028(9) 0.0006(9)
C18 0.0094(12) 0.0147(12) 0.0126(12) -0.0004(9) 0.0029(9) 0.0048(9)
C19 0.0132(13) 0.0140(12) 0.0169(12) -0.0007(9) 0.0049(10) 0.0039(9)
C20 0.0234(15) 0.0175(13) 0.0192(13) 0.0059(10) 0.0087(11) 0.0083(11)
C21 0.0229(15) 0.0283(15) 0.0138(13) 0.0074(11) 0.0034(11) 0.0121(12)
C22 0.0124(14) 0.0389(16) 0.0149(13) 0.0022(11) 0.0004(11) 0.0088(12)
C23 0.0097(13) 0.0369(16) 0.0138(12) -0.0019(11) 0.0016(10) -0.0005(11)
C24 0.0111(12) 0.0191(12) 0.0145(12) -0.0042(10) 0.0023(10) -0.0012(10)
C31 0.0153(13) 0.0113(11) 0.0198(13) 0.0002(9) 0.0044(10) 0.0024(9)
C32 0.0196(14) 0.0103(11) 0.0159(12) 0.0012(9) 0.0015(10) -0.0038(9)
C33 0.0152(13) 0.0104(11) 0.0141(12) 0.0004(9) 0.0051(10) 0.0001(9)
C34 0.0180(13) 0.0139(12) 0.0130(12) 0.0051(9) 0.0046(10) 0.0033(10)
C35 0.0151(13) 0.0201(13) 0.0119(12) 0.0044(10) 0.0017(10) 0.0026(10)
C36 0.0142(12) 0.0149(12) 0.0090(10) -0.0011(9) 0.0025(9) -0.0004(9)
C37 0.0069(11) 0.0121(11) 0.0111(11) -0.0013(9) 0.0036(9) -0.0002(9)
C38 0.0269(15) 0.0124(11) 0.0132(12) -0.0029(9) 0.0012(11) -0.0019(10)
C39 0.0077(11) 0.0172(11) 0.0145(11) 0.0023(10) 0.0037(9) -0.0016(10)
C40 0.0116(13) 0.0137(12) 0.0146(12) 0.0033(9) 0.0012(10) -0.0044(9)
C41 0.0193(14) 0.0136(12) 0.0162(13) -0.0001(10) -0.0024(11) -0.0071(10)
C42 0.0156(13) 0.0151(12) 0.0136(12) -0.0006(9) -0.0024(10) -0.0037(10)
C43 0.0120(11) 0.0144(11) 0.0064(10) 0.0011(9) -0.0012(8) -0.0025(10)
C44 0.0094(12) 0.0122(11) 0.0085(10) 0.0048(9) -0.0019(9) -0.0014(9)
C45 0.0139(13) 0.0173(12) 0.0109(12) 0.0022(9) -0.0012(10) 0.0019(10)
C46 0.0100(13) 0.0229(13) 0.0142(12) 0.0027(10) 0.0018(10) 0.0019(10)
C47 0.0108(12) 0.0134(11) 0.0095(11) 0.0000(9) 0.0013(9) 0.0005(9)
C48 0.0068(11) 0.0171(12) 0.0104(11) 0.0009(9) 0.0008(9) 0.0045(9)
C49 0.0128(13) 0.0126(11) 0.0154(12) -0.0004(9) 0.0000(10) 0.0030(9)
C50 0.0177(14) 0.0136(12) 0.0192(13) -0.0054(10) -0.0026(11) 0.0050(10)
C51 0.0229(15) 0.0271(14) 0.0143(13) -0.0066(11) 0.0017(11) 0.0110(12)
C52 0.0141(14) 0.0379(16) 0.0168(13) -0.0038(12) 0.0042(11) 0.0080(12)
C53 0.0102(13) 0.0368(15) 0.0146(12) 0.0037(11) 0.0052(10) -0.0009(11)
C54 0.0103(12) 0.0185(12) 0.0126(11) 0.0035(9) 0.0024(9) -0.0014(9)
Si1 0.0101(3) 0.0081(3) 0.0125(3) -0.0005(2) 0.0015(3) -0.0002(2)
Si2 0.0113(3) 0.0068(3) 0.0108(3) 0.0006(2) 0.0017(2) 0.0003(2)
Ru1 0.00764(9) 0.00732(8) 0.00756(8) -0.00054(7) 0.00200(7) -0.00025(7)
Ru2 0.00679(9) 0.00684(8) 0.00710(8) 0.00068(7) 0.00065(7) -0.00008(7)
N1 0.0085(10) 0.0093(9) 0.0099(9) -0.0010(7) 0.0007(8) 0.0004(7)
N2 0.0164(11) 0.0091(9) 0.0110(10) 0.0017(7) 0.0025(8) -0.0013(8)
N3 0.0101(10) 0.0083(9) 0.0099(9) 0.0004(7) 0.0027(8) 0.0006(7)
N4 0.0164(11) 0.0077(9) 0.0089(9) -0.0019(7) 0.0013(8) -0.0007(8)
 
 
#----------------------------------------------------------------------------#
#                   MOLECULAR GEOMETRY                                       #
#----------------------------------------------------------------------------#
 
_geom_special_details
;
 All s.u.'s (except the s.u. in the dihedral angle between two l.s. planes)
 are estimated using the full covariance matrix.  The cell s.u.'s are taken
 into account individually in the estimation of s.u.'s in distances, angles
 and torsion angles; correlations between s.u.'s in cell parameters are only
 used when they are defined by crystal symmetry.  An approximate (isotropic)
 treatment of cell s.u.'s is used for estimating s.u.'s involving l.s. planes.
;
loop_
    _geom_bond_atom_site_label_1
    _geom_bond_atom_site_label_2
    _geom_bond_distance
    _geom_bond_site_symmetry_2
    _geom_bond_publ_flag
C1 Si1 1.909(2) . ?
C1 H1A 0.98 . ?
C1 H1B 0.98 . ?
C1 H1C 0.98 . ?
C2 Si1 1.897(2) . ?
C2 H2A 0.98 . ?
C2 H2B 0.98 . ?
C2 H2C 0.98 . ?
C3 N1 1.361(3) . ?
C3 C4 1.370(3) . ?
C3 H3 0.95 . ?
C4 C5 1.392(3) . ?
C4 H4 0.95 . ?
C5 C6 1.376(3) . ?
C5 H5 0.95 . ?
C6 C7 1.419(3) . ?
C6 H6 0.95 . ?
C7 N2 1.355(3) . ?
C7 N1 1.371(3) . ?
C8 N2 1.472(3) . ?
C8 H8A 0.98 . ?
C8 H8B 0.98 . ?
C8 H8C 0.98 . ?
C9 C10 1.410(3) . ?
C9 C16 1.515(3) . ?
C9 Ru1 2.227(2) . ?
C9 H9 1 . ?
C10 C11 1.531(3) . ?
C10 Ru1 2.207(2) . ?
C10 H10 1 . ?
C11 C12 1.542(3) . ?
C11 H11A 0.99 . ?
C11 H11B 0.99 . ?
C12 C13 1.523(3) . ?
C12 H12A 0.99 . ?
C12 H12B 0.99 . ?
C13 C14 1.415(3) . ?
C13 Ru1 2.189(2) . ?
C13 H13 1 . ?
C14 C15 1.535(3) . ?
C14 Ru1 2.195(2) . ?
C14 H14 1 . ?
C15 C16 1.544(3) . ?
C15 H15A 0.99 . ?
C15 H15B 0.99 . ?
C16 H16A 0.99 . ?
C16 H16B 0.99 . ?
C17 C18 1.426(3) . ?
C17 C24 1.523(3) . ?
C17 Ru1 2.282(2) . ?
C17 H17 1 . ?
C18 C19 1.414(3) . ?
C18 Ru1 2.227(2) . ?
C18 H18 1 . ?
C19 C20 1.479(3) . ?
C19 Ru1 2.442(2) . ?
C19 H19 1 . ?
C20 C21 1.325(4) . ?
C20 H20 0.95 . ?
C21 C22 1.522(4) . ?
C21 H21 0.95 . ?
C22 C23 1.542(4) . ?
C22 H22A 0.99 . ?
C22 H22B 0.99 . ?
C23 C24 1.543(3) . ?
C23 H23A 0.99 . ?
C23 H23B 0.99 . ?
C24 H24A 0.99 . ?
C24 H24B 0.99 . ?
C31 Si2 1.910(2) . ?
C31 H31A 0.98 . ?
C31 H31B 0.98 . ?
C31 H31C 0.98 . ?
C32 Si2 1.899(2) . ?
C32 H32A 0.98 . ?
C32 H32B 0.98 . ?
C32 H32C 0.98 . ?
C33 N3 1.357(3) . ?
C33 C34 1.373(3) . ?
C33 H33 0.95 . ?
C34 C35 1.388(3) . ?
C34 H34 0.95 . ?
C35 C36 1.371(3) . ?
C35 H35 0.95 . ?
C36 C37 1.412(3) . ?
C36 H36 0.95 . ?
C37 N3 1.367(3) . ?
C37 N4 1.367(3) . ?
C38 N4 1.466(3) . ?
C38 H38A 0.98 . ?
C38 H38B 0.98 . ?
C38 H38C 0.98 . ?
C39 C40 1.417(3) . ?
C39 C46 1.535(3) . ?
C39 Ru2 2.194(2) . ?
C39 H39 1 . ?
C40 C41 1.513(3) . ?
C40 Ru2 2.190(2) . ?
C40 H40 1 . ?
C41 C42 1.542(3) . ?
C41 H41A 0.99 . ?
C41 H41B 0.99 . ?
C42 C43 1.527(3) . ?
C42 H42A 0.99 . ?
C42 H42B 0.99 . ?
C43 C44 1.412(3) . ?
C43 Ru2 2.182(2) . ?
C43 H43 1 . ?
C44 C45 1.522(3) . ?
C44 Ru2 2.211(2) . ?
C44 H44 1 . ?
C45 C46 1.549(3) . ?
C45 H45A 0.99 . ?
C45 H45B 0.99 . ?
C46 H46A 0.99 . ?
C46 H46B 0.99 . ?
C47 C48 1.424(3) . ?
C47 C54 1.523(3) . ?
C47 Ru2 2.279(2) . ?
C47 H47 1 . ?
C48 C49 1.407(3) . ?
C48 Ru2 2.232(2) . ?
C48 H48 1 . ?
C49 C50 1.472(3) . ?
C49 Ru2 2.453(2) . ?
C49 H49 1 . ?
C50 C51 1.341(4) . ?
C50 H50 0.95 . ?
C51 C52 1.512(4) . ?
C51 H51 0.95 . ?
C52 C53 1.537(4) . ?
C52 H52A 0.99 . ?
C52 H52B 0.99 . ?
C53 C54 1.539(3) . ?
C53 H53A 0.99 . ?
C53 H53B 0.99 . ?
C54 H54A 0.99 . ?
C54 H54B 0.99 . ?
Si1 N2 1.813(2) . ?
Si1 Ru1 2.3809(7) . ?
Si2 N4 1.801(2) . ?
Si2 Ru2 2.3789(7) . ?
Ru1 N1 2.1875(18) . ?
Ru2 N3 2.1897(19) . ?
 
loop_
    _geom_angle_atom_site_label_1
    _geom_angle_atom_site_label_2
    _geom_angle_atom_site_label_3
    _geom_angle
    _geom_angle_site_symmetry_1
    _geom_angle_site_symmetry_3
    _geom_angle_publ_flag
Si1 C1 H1A 109.5 . . ?
Si1 C1 H1B 109.5 . . ?
H1A C1 H1B 109.5 . . ?
Si1 C1 H1C 109.5 . . ?
H1A C1 H1C 109.5 . . ?
H1B C1 H1C 109.5 . . ?
Si1 C2 H2A 109.5 . . ?
Si1 C2 H2B 109.5 . . ?
H2A C2 H2B 109.5 . . ?
Si1 C2 H2C 109.5 . . ?
H2A C2 H2C 109.5 . . ?
H2B C2 H2C 109.5 . . ?
N1 C3 C4 124.5(2) . . ?
N1 C3 H3 117.8 . . ?
C4 C3 H3 117.8 . . ?
C3 C4 C5 118.1(2) . . ?
C3 C4 H4 121 . . ?
C5 C4 H4 121 . . ?
C6 C5 C4 119.3(2) . . ?
C6 C5 H5 120.4 . . ?
C4 C5 H5 120.4 . . ?
C5 C6 C7 120.6(2) . . ?
C5 C6 H6 119.7 . . ?
C7 C6 H6 119.7 . . ?
N2 C7 N1 116.8(2) . . ?
N2 C7 C6 123.6(2) . . ?
N1 C7 C6 119.7(2) . . ?
N2 C8 H8A 109.5 . . ?
N2 C8 H8B 109.5 . . ?
H8A C8 H8B 109.5 . . ?
N2 C8 H8C 109.5 . . ?
H8A C8 H8C 109.5 . . ?
H8B C8 H8C 109.5 . . ?
C10 C9 C16 120.3(2) . . ?
C10 C9 Ru1 70.67(12) . . ?
C16 C9 Ru1 114.50(15) . . ?
C10 C9 H9 114.7 . . ?
C16 C9 H9 114.7 . . ?
Ru1 C9 H9 114.7 . . ?
C9 C10 C11 122.7(2) . . ?
C9 C10 Ru1 72.24(13) . . ?
C11 C10 Ru1 114.27(15) . . ?
C9 C10 H10 113.7 . . ?
C11 C10 H10 113.7 . . ?
Ru1 C10 H10 113.7 . . ?
C10 C11 C12 112.79(19) . . ?
C10 C11 H11A 109 . . ?
C12 C11 H11A 109 . . ?
C10 C11 H11B 109 . . ?
C12 C11 H11B 109 . . ?
H11A C11 H11B 107.8 . . ?
C13 C12 C11 112.55(19) . . ?
C13 C12 H12A 109.1 . . ?
C11 C12 H12A 109.1 . . ?
C13 C12 H12B 109.1 . . ?
C11 C12 H12B 109.1 . . ?
H12A C12 H12B 107.8 . . ?
C14 C13 C12 123.6(2) . . ?
C14 C13 Ru1 71.40(13) . . ?
C12 C13 Ru1 112.40(16) . . ?
C14 C13 H13 114 . . ?
C12 C13 H13 114 . . ?
Ru1 C13 H13 114 . . ?
C13 C14 C15 122.1(2) . . ?
C13 C14 Ru1 70.95(13) . . ?
C15 C14 Ru1 116.05(15) . . ?
C13 C14 H14 113.7 . . ?
C15 C14 H14 113.7 . . ?
Ru1 C14 H14 113.7 . . ?
C14 C15 C16 113.4(2) . . ?
C14 C15 H15A 108.9 . . ?
C16 C15 H15A 108.9 . . ?
C14 C15 H15B 108.9 . . ?
C16 C15 H15B 108.9 . . ?
H15A C15 H15B 107.7 . . ?
C9 C16 C15 112.89(19) . . ?
C9 C16 H16A 109 . . ?
C15 C16 H16A 109 . . ?
C9 C16 H16B 109 . . ?
C15 C16 H16B 109 . . ?
H16A C16 H16B 107.8 . . ?
C18 C17 C24 125.6(2) . . ?
C18 C17 Ru1 69.48(13) . . ?
C24 C17 Ru1 118.09(16) . . ?
C18 C17 H17 112.3 . . ?
C24 C17 H17 112.3 . . ?
Ru1 C17 H17 112.3 . . ?
C19 C18 C17 125.7(2) . . ?
C19 C18 Ru1 80.89(14) . . ?
C17 C18 Ru1 73.67(14) . . ?
C19 C18 H18 117.1 . . ?
C17 C18 H18 117.1 . . ?
Ru1 C18 H18 117.1 . . ?
C18 C19 C20 124.1(2) . . ?
C18 C19 Ru1 64.24(13) . . ?
C20 C19 Ru1 118.48(16) . . ?
C18 C19 H19 113.7 . . ?
C20 C19 H19 113.7 . . ?
Ru1 C19 H19 113.7 . . ?
C21 C20 C19 125.2(2) . . ?
C21 C20 H20 117.4 . . ?
C19 C20 H20 117.4 . . ?
C20 C21 C22 125.6(2) . . ?
C20 C21 H21 117.2 . . ?
C22 C21 H21 117.2 . . ?
C21 C22 C23 114.4(2) . . ?
C21 C22 H22A 108.7 . . ?
C23 C22 H22A 108.7 . . ?
C21 C22 H22B 108.7 . . ?
C23 C22 H22B 108.7 . . ?
H22A C22 H22B 107.6 . . ?
C22 C23 C24 113.8(2) . . ?
C22 C23 H23A 108.8 . . ?
C24 C23 H23A 108.8 . . ?
C22 C23 H23B 108.8 . . ?
C24 C23 H23B 108.8 . . ?
H23A C23 H23B 107.7 . . ?
C17 C24 C23 113.4(2) . . ?
C17 C24 H24A 108.9 . . ?
C23 C24 H24A 108.9 . . ?
C17 C24 H24B 108.9 . . ?
C23 C24 H24B 108.9 . . ?
H24A C24 H24B 107.7 . . ?
Si2 C31 H31A 109.5 . . ?
Si2 C31 H31B 109.5 . . ?
H31A C31 H31B 109.5 . . ?
Si2 C31 H31C 109.5 . . ?
H31A C31 H31C 109.5 . . ?
H31B C31 H31C 109.5 . . ?
Si2 C32 H32A 109.5 . . ?
Si2 C32 H32B 109.5 . . ?
H32A C32 H32B 109.5 . . ?
Si2 C32 H32C 109.5 . . ?
H32A C32 H32C 109.5 . . ?
H32B C32 H32C 109.5 . . ?
N3 C33 C34 124.6(2) . . ?
N3 C33 H33 117.7 . . ?
C34 C33 H33 117.7 . . ?
C33 C34 C35 117.6(2) . . ?
C33 C34 H34 121.2 . . ?
C35 C34 H34 121.2 . . ?
C36 C35 C34 119.9(2) . . ?
C36 C35 H35 120 . . ?
C34 C35 H35 120 . . ?
C35 C36 C37 120.0(2) . . ?
C35 C36 H36 120 . . ?
C37 C36 H36 120 . . ?
N3 C37 N4 116.5(2) . . ?
N3 C37 C36 120.4(2) . . ?
N4 C37 C36 123.1(2) . . ?
N4 C38 H38A 109.5 . . ?
N4 C38 H38B 109.5 . . ?
H38A C38 H38B 109.5 . . ?
N4 C38 H38C 109.5 . . ?
H38A C38 H38C 109.5 . . ?
H38B C38 H38C 109.5 . . ?
C40 C39 C46 122.4(2) . . ?
C40 C39 Ru2 70.98(13) . . ?
C46 C39 Ru2 115.75(15) . . ?
C40 C39 H39 113.6 . . ?
C46 C39 H39 113.6 . . ?
Ru2 C39 H39 113.6 . . ?
C39 C40 C41 123.7(2) . . ?
C39 C40 Ru2 71.31(13) . . ?
C41 C40 Ru2 112.38(16) . . ?
C39 C40 H40 114 . . ?
C41 C40 H40 114 . . ?
Ru2 C40 H40 114 . . ?
C40 C41 C42 112.00(19) . . ?
C40 C41 H41A 109.2 . . ?
C42 C41 H41A 109.2 . . ?
C40 C41 H41B 109.2 . . ?
C42 C41 H41B 109.2 . . ?
H41A C41 H41B 107.9 . . ?
C43 C42 C41 113.64(19) . . ?
C43 C42 H42A 108.8 . . ?
C41 C42 H42A 108.8 . . ?
C43 C42 H42B 108.8 . . ?
C41 C42 H42B 108.8 . . ?
H42A C42 H42B 107.7 . . ?
C44 C43 C42 122.5(2) . . ?
C44 C43 Ru2 72.34(12) . . ?
C42 C43 Ru2 113.97(15) . . ?
C44 C43 H43 113.8 . . ?
C42 C43 H43 113.8 . . ?
Ru2 C43 H43 113.8 . . ?
C43 C44 C45 120.6(2) . . ?
C43 C44 Ru2 70.16(12) . . ?
C45 C44 Ru2 114.93(15) . . ?
C43 C44 H44 114.6 . . ?
C45 C44 H44 114.6 . . ?
Ru2 C44 H44 114.6 . . ?
C44 C45 C46 112.43(19) . . ?
C44 C45 H45A 109.1 . . ?
C46 C45 H45A 109.1 . . ?
C44 C45 H45B 109.1 . . ?
C46 C45 H45B 109.1 . . ?
H45A C45 H45B 107.8 . . ?
C39 C46 C45 113.7(2) . . ?
C39 C46 H46A 108.8 . . ?
C45 C46 H46A 108.8 . . ?
C39 C46 H46B 108.8 . . ?
C45 C46 H46B 108.8 . . ?
H46A C46 H46B 107.7 . . ?
C48 C47 C54 125.8(2) . . ?
C48 C47 Ru2 69.80(13) . . ?
C54 C47 Ru2 120.06(16) . . ?
C48 C47 H47 111.6 . . ?
C54 C47 H47 111.6 . . ?
Ru2 C47 H47 111.6 . . ?
C49 C48 C47 126.1(2) . . ?
C49 C48 Ru2 81.33(14) . . ?
C47 C48 Ru2 73.41(13) . . ?
C49 C48 H48 117 . . ?
C47 C48 H48 117 . . ?
Ru2 C48 H48 117 . . ?
C48 C49 C50 124.0(2) . . ?
C48 C49 Ru2 64.11(13) . . ?
C50 C49 Ru2 118.25(16) . . ?
C48 C49 H49 113.8 . . ?
C50 C49 H49 113.8 . . ?
Ru2 C49 H49 113.8 . . ?
C51 C50 C49 125.3(2) . . ?
C51 C50 H50 117.4 . . ?
C49 C50 H50 117.4 . . ?
C50 C51 C52 125.0(2) . . ?
C50 C51 H51 117.5 . . ?
C52 C51 H51 117.5 . . ?
C51 C52 C53 115.5(2) . . ?
C51 C52 H52A 108.4 . . ?
C53 C52 H52A 108.4 . . ?
C51 C52 H52B 108.4 . . ?
C53 C52 H52B 108.4 . . ?
H52A C52 H52B 107.5 . . ?
C52 C53 C54 114.0(2) . . ?
C52 C53 H53A 108.7 . . ?
C54 C53 H53A 108.7 . . ?
C52 C53 H53B 108.7 . . ?
C54 C53 H53B 108.7 . . ?
H53A C53 H53B 107.6 . . ?
C47 C54 C53 113.02(19) . . ?
C47 C54 H54A 109 . . ?
C53 C54 H54A 109 . . ?
C47 C54 H54B 109 . . ?
C53 C54 H54B 109 . . ?
H54A C54 H54B 107.8 . . ?
N2 Si1 C2 105.01(11) . . ?
N2 Si1 C1 100.71(11) . . ?
C2 Si1 C1 101.89(11) . . ?
N2 Si1 Ru1 98.96(6) . . ?
C2 Si1 Ru1 120.98(8) . . ?
C1 Si1 Ru1 125.48(8) . . ?
N4 Si2 C32 104.39(10) . . ?
N4 Si2 C31 100.15(10) . . ?
C32 Si2 C31 102.67(11) . . ?
N4 Si2 Ru2 99.20(6) . . ?
C32 Si2 Ru2 121.19(8) . . ?
C31 Si2 Ru2 125.04(8) . . ?
N1 Ru1 C13 88.16(8) . . ?
N1 Ru1 C14 88.39(8) . . ?
C13 Ru1 C14 37.66(9) . . ?
N1 Ru1 C10 165.11(8) . . ?
C13 Ru1 C10 79.25(9) . . ?
C14 Ru1 C10 86.47(9) . . ?
N1 Ru1 C9 153.93(8) . . ?
C13 Ru1 C9 94.47(9) . . ?
C14 Ru1 C9 78.31(9) . . ?
C10 Ru1 C9 37.08(8) . . ?
N1 Ru1 C18 76.62(8) . . ?
C13 Ru1 C18 122.11(9) . . ?
C14 Ru1 C18 156.18(8) . . ?
C10 Ru1 C18 103.31(9) . . ?
C9 Ru1 C18 122.34(9) . . ?
N1 Ru1 C17 93.71(8) . . ?
C13 Ru1 C17 156.51(9) . . ?
C14 Ru1 C17 165.63(8) . . ?
C10 Ru1 C17 94.73(9) . . ?
C9 Ru1 C17 94.03(9) . . ?
C18 Ru1 C17 36.85(8) . . ?
N1 Ru1 Si1 78.76(5) . . ?
C13 Ru1 Si1 120.58(7) . . ?
C14 Ru1 Si1 83.82(7) . . ?
C10 Ru1 Si1 114.49(6) . . ?
C9 Ru1 Si1 77.61(6) . . ?
C18 Ru1 Si1 110.66(6) . . ?
C17 Ru1 Si1 82.65(6) . . ?
N1 Ru1 C19 91.64(8) . . ?
C13 Ru1 C19 91.97(9) . . ?
C14 Ru1 C19 129.62(9) . . ?
C10 Ru1 C19 80.98(8) . . ?
C9 Ru1 C19 114.14(8) . . ?
C18 Ru1 C19 34.87(8) . . ?
C17 Ru1 C19 64.58(8) . . ?
Si1 Ru1 C19 145.29(6) . . ?
C43 Ru2 C40 79.67(9) . . ?
C43 Ru2 N3 165.62(8) . . ?
C40 Ru2 N3 88.64(8) . . ?
C43 Ru2 C39 87.03(9) . . ?
C40 Ru2 C39 37.71(9) . . ?
N3 Ru2 C39 88.80(8) . . ?
C43 Ru2 C44 37.50(8) . . ?
C40 Ru2 C44 94.95(9) . . ?
N3 Ru2 C44 153.82(8) . . ?
C39 Ru2 C44 78.66(9) . . ?
C43 Ru2 C48 101.83(9) . . ?
C40 Ru2 C48 122.35(9) . . ?
N3 Ru2 C48 77.34(8) . . ?
C39 Ru2 C48 156.88(8) . . ?
C44 Ru2 C48 121.07(9) . . ?
C43 Ru2 C47 92.81(9) . . ?
C40 Ru2 C47 156.12(9) . . ?
N3 Ru2 C47 94.63(8) . . ?
C39 Ru2 C47 165.58(8) . . ?
C44 Ru2 C47 92.46(8) . . ?
C48 Ru2 C47 36.79(8) . . ?
C43 Ru2 Si2 114.53(6) . . ?
C40 Ru2 Si2 120.58(7) . . ?
N3 Ru2 Si2 78.63(5) . . ?
C39 Ru2 Si2 83.76(7) . . ?
C44 Ru2 Si2 77.24(6) . . ?
C48 Ru2 Si2 110.95(6) . . ?
C47 Ru2 Si2 83.20(6) . . ?
C43 Ru2 C49 80.54(8) . . ?
C40 Ru2 C49 91.97(9) . . ?
N3 Ru2 C49 91.62(8) . . ?
C39 Ru2 C49 129.67(9) . . ?
C44 Ru2 C49 114.10(8) . . ?
C48 Ru2 C49 34.56(8) . . ?
C47 Ru2 C49 64.33(8) . . ?
Si2 Ru2 C49 145.34(6) . . ?
C3 N1 C7 117.9(2) . . ?
C3 N1 Ru1 119.74(15) . . ?
C7 N1 Ru1 121.97(15) . . ?
C7 N2 C8 117.9(2) . . ?
C7 N2 Si1 119.61(16) . . ?
C8 N2 Si1 121.53(15) . . ?
C33 N3 C37 117.5(2) . . ?
C33 N3 Ru2 119.86(15) . . ?
C37 N3 Ru2 121.92(15) . . ?
C37 N4 C38 117.58(19) . . ?
C37 N4 Si2 119.61(15) . . ?
C38 N4 Si2 121.76(15) . . ?
 
# The following lines are used to test the character set of files sent by
# network email or other means. They are not part of the CIF data set
# abcdefghijklmnopqrstuvwxyzABCDEFGHIJKLMNOPQRSTUVWXYZ0123456789
# !@#$%^&*()_+{}:"~<>?|\-=[];'`,./
 
# END 
data_kso071210
#----------------------------------------------------------------------------#
#                   CHEMICAL INFORMATION                                     #
#----------------------------------------------------------------------------#
 
_chemical_name_systematic
;
 ?
;
_chemical_formula_moiety                'C24 H40 N6 Ru1 Si3'
_chemical_formula_sum                   'C24 H40 N6 Ru Si3'
_chemical_formula_weight                597.96
_chemical_compound_source               'synthesis as described'
_chemical_absolute_configuration        ad
 
#----------------------------------------------------------------------------#
#                   UNIT CELL INFORMATION                                    #
#----------------------------------------------------------------------------#
 
_symmetry_cell_setting                  orthorhombic
_symmetry_space_group_name_H-M          'P 21 21 21'
_symmetry_space_group_name_Hall         'P 2ac 2ab'
_symmetry_Int_Tables_number             19
loop_
    _symmetry_equiv_pos_as_xyz
'x, y, z'
'x+1/2, -y+1/2, -z'
'-x, y+1/2, -z+1/2'
'-x+1/2, -y, z+1/2'
 
_cell_length_a                          9.6790(6)
_cell_length_b                          16.0690(8)
_cell_length_c                          36.6520(18)
_cell_angle_alpha                       90
_cell_angle_beta                        90
_cell_angle_gamma                       90
_cell_volume                            5700.6(5)
_cell_formula_units_Z                   8
_cell_measurement_temperature           100(2)
_cell_measurement_reflns_used           9199
_cell_measurement_theta_min             2.45
_cell_measurement_theta_max             35.28
_cell_measurement_wavelength            0.71073
 
#----------------------------------------------------------------------------#
#                   CRYSTAL INFORMATION                                      #
#----------------------------------------------------------------------------#
 
_exptl_crystal_description              block
_exptl_crystal_colour                   colourless
_exptl_crystal_size_max                 0.2
_exptl_crystal_size_mid                 0.18
_exptl_crystal_size_min                 0.12
_exptl_crystal_density_diffrn           1.393
_exptl_crystal_density_method           'not measured'
_exptl_crystal_F_000                    2496
_exptl_special_details
;
 ?
;
 
#----------------------------------------------------------------------------#
#                   ABSORPTION CORRECTION                                    #
#----------------------------------------------------------------------------#
 
_exptl_absorpt_coefficient_mu           0.7
_exptl_absorpt_correction_type    multi-scan 
_exptl_absorpt_process_details
;
        [c.f. r.h. blessing, acta cryst. (1995), a51, 33-38]
;
_exptl_absorpt_correction_T_min   0.85 
_exptl_absorpt_correction_T_max   0.92 
 
#----------------------------------------------------------------------------#
#                   DATA COLLECTION                                          #
#----------------------------------------------------------------------------#
 
 
_diffrn_ambient_temperature             100(2)
_diffrn_radiation_type            MoK\a
_diffrn_radiation_wavelength  0.71073
_diffrn_radiation_source          'fine-focus sealed tube'
_diffrn_radiation_monochromator   graphite
_diffrn_measurement_device_type   'Bruker Kappa APEX II'
_diffrn_measurement_method        \w-\f
_diffrn_standards_number          0
_diffrn_standards_interval_count  0
_diffrn_standards_interval_time   0
_diffrn_standards_decay_%         0
_diffrn_reflns_av_R_equivalents         0.0288
_diffrn_reflns_av_unetI/netI            0.0145
_diffrn_reflns_number                   123481
_diffrn_reflns_limit_h_min              -12
_diffrn_reflns_limit_h_max              12
_diffrn_reflns_limit_k_min              -19
_diffrn_reflns_limit_k_max              20
_diffrn_reflns_limit_l_min              -45
_diffrn_reflns_limit_l_max              45
_diffrn_reflns_theta_min                3.3
_diffrn_reflns_theta_max                26.37
_diffrn_reflns_theta_full               26.37
_diffrn_measured_fraction_theta_full
                                        0.997
_diffrn_measured_fraction_theta_max
                                        0.997
_reflns_number_total                    11635
_reflns_number_gt                       11371
_reflns_threshold_expression            >2\s(I)
 
#----------------------------------------------------------------------------#
#                   COMPUTER PROGRAMS USED                                   #
#----------------------------------------------------------------------------#
 
_computing_data_collection              'Bruker SMART'
_computing_cell_refinement              'Bruker SMART'
_computing_data_reduction               'Bruker SAINT'
_computing_structure_solution           'Bruker SHELXTL'
_computing_structure_refinement         'SHELXL-97 (Sheldrick, 2008)'
_computing_molecular_graphics           'Ortep-3 for Windows (Farrugia, 1997)'
_computing_publication_material
                                   'WinGX publication routines (Farrugia, 1999)'
 
#----------------------------------------------------------------------------#
#                   STRUCTURE SOLUTION
#----------------------------------------------------------------------------#
 
_atom_sites_solution_primary            direct
_atom_sites_solution_secondary          difmap
_atom_sites_solution_hydrogens          geom
 
#----------------------------------------------------------------------------#
#                   REFINEMENT INFORMATION                                   #
#----------------------------------------------------------------------------#
 
_refine_special_details
;
 Refinement of F^2^ against ALL reflections.  The weighted R-factor wR and
 goodness of fit S are based on F^2^, conventional R-factors R are based
 on F, with F set to zero for negative F^2^. The threshold expression of
 F^2^ > 2\s(F^2^) is used only for calculating R-factors(gt) etc. and is
 not relevant to the choice of reflections for refinement.  R-factors based
 on F^2^ are statistically about twice as large as those based on F, and R-
 factors based on ALL data will be even larger.
;
_refine_ls_structure_factor_coef        Fsqd
_refine_ls_matrix_type                  full
_refine_ls_weighting_scheme             calc
_refine_ls_weighting_details
         'calc w=1/[\s^2^(Fo^2^)+(0.0157P)^2^+2.3082P] where P=(Fo^2^+2Fc^2^)/3'
_refine_ls_hydrogen_treatment           mixed
_refine_ls_extinction_method            none
_refine_ls_number_reflns                11635
_refine_ls_number_parameters            639
_refine_ls_number_restraints            0
_refine_ls_R_factor_all                 0.0169
_refine_ls_R_factor_gt                  0.0161
_refine_ls_wR_factor_ref                0.0398
_refine_ls_wR_factor_gt                 0.0393
_refine_ls_goodness_of_fit_ref          1.11
_refine_ls_restrained_S_all             1.11
_refine_ls_shift/su_max                 0.001
_refine_ls_shift/su_mean                0
_refine_ls_abs_structure_details
                                    'Flack H D (1983), Acta Cryst. A39, 876-881'
_refine_ls_abs_structure_Flack          -0.019(10)
_refine_diff_density_max                0.266
_refine_diff_density_min                -0.215
_refine_diff_density_rms                0.042
 
#----------------------------------------------------------------------------#
#                   ATOMIC TYPES, COORDINATES AND THERMAL PARAMETERS         #
#----------------------------------------------------------------------------#
 
loop_
    _atom_type_symbol
    _atom_type_description
    _atom_type_scat_dispersion_real
    _atom_type_scat_dispersion_imag
    _atom_type_scat_source
C C 0.0033 0.0016 'International Tables Vol C Tables 4.2.6.8 and 6.1.1.4'
H H 0 0 'International Tables Vol C Tables 4.2.6.8 and 6.1.1.4'
N N 0.0061 0.0033 'International Tables Vol C Tables 4.2.6.8 and 6.1.1.4'
Si Si 0.0817 0.0704 'International Tables Vol C Tables 4.2.6.8 and 6.1.1.4'
Ru Ru -1.2594 0.8363 'International Tables Vol C Tables 4.2.6.8 and 6.1.1.4'
 
loop_
    _atom_site_label
    _atom_site_type_symbol
    _atom_site_fract_x
    _atom_site_fract_y
    _atom_site_fract_z
    _atom_site_U_iso_or_equiv
    _atom_site_adp_type
    _atom_site_occupancy
    _atom_site_symmetry_multiplicity
    _atom_site_calc_flag
    _atom_site_refinement_flags
    _atom_site_disorder_assembly
    _atom_site_disorder_group
C1 C 0.7135(2) -0.34843(14) 0.26297(5) 0.0285(5) Uani 1 1 d . . .
H1A H 0.7525 -0.3062 0.2793 0.043 Uiso 1 1 calc R . .
H1B H 0.7066 -0.4016 0.276 0.043 Uiso 1 1 calc R . .
H1C H 0.6213 -0.3309 0.255 0.043 Uiso 1 1 calc R . .
C2 C 1.44814(19) -0.29303(13) 0.18037(6) 0.0259(4) Uani 1 1 d . . .
H2A H 1.5191 -0.3276 0.1688 0.039 Uiso 1 1 calc R . .
H2B H 1.4614 -0.2935 0.2069 0.039 Uiso 1 1 calc R . .
H2C H 1.4556 -0.2358 0.1713 0.039 Uiso 1 1 calc R . .
C3 C 1.0130(2) -0.66612(11) 0.10551(5) 0.0268(4) Uani 1 1 d . . .
H3A H 0.9397 -0.7035 0.114 0.04 Uiso 1 1 calc R . .
H3B H 1.1032 -0.6895 0.112 0.04 Uiso 1 1 calc R . .
H3C H 1.0068 -0.6598 0.079 0.04 Uiso 1 1 calc R . .
C4 C 0.9502(2) -0.49729(13) 0.26474(5) 0.0260(4) Uani 1 1 d . . .
H4A H 1.0269 -0.4616 0.2725 0.039 Uiso 1 1 calc R . .
H4B H 0.9836 -0.5544 0.2615 0.039 Uiso 1 1 calc R . .
H4C H 0.8775 -0.4964 0.2833 0.039 Uiso 1 1 calc R . .
C5 C 0.7276(2) -0.52934(13) 0.21131(5) 0.0282(5) Uani 1 1 d . . .
H5A H 0.6655 -0.5289 0.2324 0.042 Uiso 1 1 calc R . .
H5B H 0.7615 -0.586 0.2072 0.042 Uiso 1 1 calc R . .
H5C H 0.6775 -0.5102 0.1896 0.042 Uiso 1 1 calc R . .
C6 C 1.3198(2) -0.43417(15) 0.23562(6) 0.0351(5) Uani 1 1 d . . .
H6A H 1.3649 -0.4755 0.22 0.053 Uiso 1 1 calc R . .
H6B H 1.2662 -0.4627 0.2545 0.053 Uiso 1 1 calc R . .
H6C H 1.3902 -0.399 0.2471 0.053 Uiso 1 1 calc R . .
C7 C 1.1646(2) -0.27353(13) 0.23726(5) 0.0279(5) Uani 1 1 d . . .
H7A H 1.252 -0.2519 0.2469 0.042 Uiso 1 1 calc R . .
H7B H 1.1049 -0.2902 0.2576 0.042 Uiso 1 1 calc R . .
H7C H 1.1185 -0.2301 0.2229 0.042 Uiso 1 1 calc R . .
C8 C 1.1495(3) -0.63582(13) 0.18734(6) 0.0340(5) Uani 1 1 d . . .
H8A H 1.0628 -0.647 0.2002 0.051 Uiso 1 1 calc R . .
H8B H 1.2214 -0.6212 0.205 0.051 Uiso 1 1 calc R . .
H8C H 1.1776 -0.6856 0.1738 0.051 Uiso 1 1 calc R . .
C9 C 1.2908(2) -0.54197(15) 0.12810(6) 0.0340(5) Uani 1 1 d . . .
H9A H 1.3159 -0.5981 0.12 0.051 Uiso 1 1 calc R . .
H9B H 1.3639 -0.5197 0.1438 0.051 Uiso 1 1 calc R . .
H9C H 1.2793 -0.5058 0.1068 0.051 Uiso 1 1 calc R . .
C10 C 0.82646(18) -0.29106(11) 0.20954(5) 0.0178(4) Uani 1 1 d . . .
C11 C 0.7682(2) -0.21176(13) 0.21689(6) 0.0245(4) Uani 1 1 d . . .
H11 H 0.7099 -0.2044 0.2375 0.029 Uiso 1 1 calc R . .
C12 C 0.7960(2) -0.14602(12) 0.19438(6) 0.0286(5) Uani 1 1 d . . .
H12 H 0.7578 -0.0927 0.1994 0.034 Uiso 1 1 calc R . .
C13 C 0.8797(2) -0.15754(12) 0.16434(6) 0.0268(5) Uani 1 1 d . . .
H13 H 0.9 -0.1127 0.1483 0.032 Uiso 1 1 calc R . .
C14 C 0.9331(2) -0.23554(11) 0.15813(5) 0.0213(4) Uani 1 1 d . . .
H14 H 0.9895 -0.2433 0.1372 0.026 Uiso 1 1 calc R . .
C16 C 1.27071(19) -0.32582(11) 0.13626(5) 0.0175(4) Uani 1 1 d . . .
C17 C 1.3512(2) -0.29055(12) 0.10798(5) 0.0216(4) Uani 1 1 d . . .
H17 H 1.4371 -0.2649 0.1136 0.026 Uiso 1 1 calc R . .
C18 C 1.3059(2) -0.29313(12) 0.07273(5) 0.0236(4) Uani 1 1 d . . .
H18 H 1.3603 -0.2694 0.0538 0.028 Uiso 1 1 calc R . .
C19 C 1.1795(2) -0.33077(12) 0.06449(5) 0.0224(4) Uani 1 1 d . . .
H19 H 1.1463 -0.3336 0.0401 0.027 Uiso 1 1 calc R . .
C20 C 1.10551(19) -0.36334(11) 0.09293(5) 0.0190(4) Uani 1 1 d . . .
H20 H 1.0195 -0.3889 0.0875 0.023 Uiso 1 1 calc R . .
C23 C 0.74958(19) -0.42106(12) 0.12534(5) 0.0209(4) Uani 1 1 d . . .
H23 H 0.7399 -0.3684 0.1368 0.025 Uiso 1 1 calc R . .
C24 C 0.6449(2) -0.44730(14) 0.10298(6) 0.0293(4) Uani 1 1 d . . .
H24 H 0.5653 -0.4139 0.099 0.035 Uiso 1 1 calc R . .
C25 C 0.6593(2) -0.52453(14) 0.08638(6) 0.0334(5) Uani 1 1 d . . .
H25 H 0.5884 -0.545 0.0709 0.04 Uiso 1 1 calc R . .
C26 C 0.7747(2) -0.57087(12) 0.09228(5) 0.0266(4) Uani 1 1 d . . .
H26 H 0.7848 -0.6234 0.0807 0.032 Uiso 1 1 calc R . .
C27 C 0.87978(19) -0.54101(11) 0.11573(5) 0.0174(4) Uani 1 1 d . . .
C51 C 0.1623(2) -0.08298(14) 0.07057(7) 0.0340(5) Uani 1 1 d . . .
H51A H 0.163 -0.1417 0.0777 0.051 Uiso 1 1 calc R . .
H51B H 0.1435 -0.0786 0.0444 0.051 Uiso 1 1 calc R . .
H51C H 0.0902 -0.0536 0.0842 0.051 Uiso 1 1 calc R . .
C52 C 0.5833(3) 0.27418(13) 0.15734(6) 0.0325(5) Uani 1 1 d . . .
H52A H 0.5915 0.2575 0.183 0.049 Uiso 1 1 calc R . .
H52B H 0.4908 0.2969 0.1529 0.049 Uiso 1 1 calc R . .
H52C H 0.6528 0.3167 0.1518 0.049 Uiso 1 1 calc R . .
C53 C 0.9020(2) -0.00572(13) -0.01326(5) 0.0258(4) Uani 1 1 d . . .
H53A H 0.9908 -0.0292 -0.0056 0.039 Uiso 1 1 calc R . .
H53B H 0.9164 0.0505 -0.0229 0.039 Uiso 1 1 calc R . .
H53C H 0.8614 -0.041 -0.0322 0.039 Uiso 1 1 calc R . .
C54 C 0.4165(2) -0.07657(13) 0.00719(6) 0.0316(5) Uani 1 1 d . . .
H54A H 0.4679 -0.1236 0.0175 0.047 Uiso 1 1 calc R . .
H54B H 0.4674 -0.0536 -0.0136 0.047 Uiso 1 1 calc R . .
H54C H 0.3254 -0.0957 -0.001 0.047 Uiso 1 1 calc R . .
C55 C 0.2676(2) 0.08133(15) 0.02143(6) 0.0333(5) Uani 1 1 d . . .
H55A H 0.1901 0.0499 0.0111 0.05 Uiso 1 1 calc R . .
H55B H 0.3139 0.1124 0.002 0.05 Uiso 1 1 calc R . .
H55C H 0.233 0.1203 0.0399 0.05 Uiso 1 1 calc R . .
C56 C 0.4648(2) 0.26940(11) 0.07016(5) 0.0266(4) Uani 1 1 d . . .
H56A H 0.4411 0.3172 0.0856 0.04 Uiso 1 1 calc R . .
H56B H 0.3918 0.2608 0.052 0.04 Uiso 1 1 calc R . .
H56C H 0.5526 0.2801 0.0577 0.04 Uiso 1 1 calc R . .
C57 C 0.3125(2) 0.16623(14) 0.12464(6) 0.0283(5) Uani 1 1 d . . .
H57A H 0.3212 0.1262 0.1447 0.042 Uiso 1 1 calc R . .
H57B H 0.24 0.1477 0.1078 0.042 Uiso 1 1 calc R . .
H57C H 0.2883 0.221 0.1345 0.042 Uiso 1 1 calc R . .
C58 C 0.6458(2) 0.12755(14) -0.01658(5) 0.0279(5) Uani 1 1 d . . .
H58A H 0.7198 0.1328 -0.0347 0.042 Uiso 1 1 calc R . .
H58B H 0.5994 0.1813 -0.0136 0.042 Uiso 1 1 calc R . .
H58C H 0.5788 0.0859 -0.0248 0.042 Uiso 1 1 calc R . .
C59 C 0.8624(2) 0.17231(13) 0.03728(6) 0.0257(4) Uani 1 1 d . . .
H59A H 0.9131 0.1565 0.0594 0.039 Uiso 1 1 calc R . .
H59B H 0.8214 0.2276 0.0407 0.039 Uiso 1 1 calc R . .
H59C H 0.9259 0.1736 0.0165 0.039 Uiso 1 1 calc R . .
C60 C 0.34319(19) -0.04851(12) 0.11354(5) 0.0213(4) Uani 1 1 d . . .
C61 C 0.2696(2) -0.08788(12) 0.14230(6) 0.0285(5) Uani 1 1 d . . .
H61 H 0.1844 -0.115 0.1373 0.034 Uiso 1 1 calc R . .
C62 C 0.3206(2) -0.08702(12) 0.17696(6) 0.0309(5) Uani 1 1 d . . .
H62 H 0.2706 -0.1132 0.1961 0.037 Uiso 1 1 calc R . .
C63 C 0.4456(2) -0.04787(13) 0.18438(5) 0.0280(4) Uani 1 1 d . . .
H63 H 0.4823 -0.0459 0.2084 0.034 Uiso 1 1 calc R . .
C64 C 0.5140(2) -0.01207(11) 0.15550(5) 0.0207(4) Uani 1 1 d . . .
H64 H 0.6 0.0142 0.1603 0.025 Uiso 1 1 calc R . .
C65 C 0.72710(19) 0.15975(11) 0.13732(5) 0.0163(4) Uani 1 1 d . . .
C66 C 0.8323(2) 0.18451(12) 0.16183(5) 0.0214(4) Uani 1 1 d . . .
H66 H 0.8187 0.2314 0.1772 0.026 Uiso 1 1 calc R . .
C67 C 0.9533(2) 0.14099(12) 0.16340(5) 0.0233(4) Uani 1 1 d . . .
H67 H 1.0242 0.1577 0.1798 0.028 Uiso 1 1 calc R . .
C68 C 0.9725(2) 0.07208(12) 0.14099(5) 0.0222(4) Uani 1 1 d . . .
H68 H 1.0561 0.0411 0.1415 0.027 Uiso 1 1 calc R . .
C69 C 0.86603(18) 0.05053(12) 0.11806(5) 0.0181(3) Uani 1 1 d . . .
H69 H 0.8787 0.0035 0.1027 0.022 Uiso 1 1 calc R . .
C70 C 0.78117(17) -0.07299(11) 0.03622(5) 0.0159(3) Uani 1 1 d . . .
C71 C 0.84212(19) -0.15001(12) 0.02743(5) 0.0213(4) Uani 1 1 d . . .
H71 H 0.9066 -0.1532 0.0079 0.026 Uiso 1 1 calc R . .
C72 C 0.8092(2) -0.22050(12) 0.04676(5) 0.0246(4) Uani 1 1 d . . .
H72 H 0.85 -0.2724 0.0407 0.03 Uiso 1 1 calc R . .
C73 C 0.7155(2) -0.21492(11) 0.07528(6) 0.0259(4) Uani 1 1 d . . .
H73 H 0.6901 -0.2627 0.089 0.031 Uiso 1 1 calc R . .
C74 C 0.66048(19) -0.13804(11) 0.08313(5) 0.0204(4) Uani 1 1 d . . .
H74 H 0.5973 -0.1344 0.1029 0.025 Uiso 1 1 calc R . .
N1 N 0.80360(17) -0.35833(10) 0.23098(4) 0.0205(3) Uani 1 1 d . . .
N2 N 1.31116(16) -0.32614(9) 0.17161(4) 0.0203(3) Uani 1 1 d . . .
N3 N 0.99666(16) -0.58429(9) 0.12296(4) 0.0190(3) Uani 1 1 d . . .
N7 N 0.29682(15) -0.04575(10) 0.07862(5) 0.0240(3) Uani 1 1 d . . .
N8 N 0.60536(17) 0.20160(9) 0.13389(4) 0.0204(3) Uani 1 1 d . . .
N9 N 0.80888(16) -0.00191(10) 0.01796(4) 0.0188(3) Uani 1 1 d . . .
NA N 1.14609(15) -0.36171(9) 0.12823(4) 0.0159(3) Uani 1 1 d . . .
NA' N 0.46754(16) -0.01167(9) 0.12077(4) 0.0171(3) Uani 1 1 d . . .
NB N 0.91010(16) -0.30180(9) 0.18002(4) 0.0162(3) Uani 1 1 d . . .
NB' N 0.68966(15) -0.06751(9) 0.06478(4) 0.0151(3) Uani 1 1 d . . .
NC N 0.86549(15) -0.46493(9) 0.13216(4) 0.0147(3) Uani 1 1 d . . .
NC' N 0.74488(15) 0.09153(9) 0.11583(4) 0.0144(3) Uani 1 1 d . . .
SiA Si 0.87870(5) -0.45783(3) 0.220258(13) 0.01751(10) Uani 1 1 d . . .
SiA' Si 0.72149(5) 0.09416(3) 0.028377(13) 0.01642(10) Uani 1 1 d . . .
SiB Si 1.12364(5) -0.54638(3) 0.154441(13) 0.01813(10) Uani 1 1 d . . .
SiB' Si 0.48194(5) 0.17345(3) 0.099412(13) 0.01615(10) Uani 1 1 d . . .
SiC' Si 0.39452(5) 0.00685(3) 0.043278(15) 0.02085(11) Uani 1 1 d . . .
SiC Si 1.20013(5) -0.36704(3) 0.207055(14) 0.01926(11) Uani 1 1 d . . .
Ru Ru 1.022706(14) -0.421387(8) 0.172201(4) 0.01269(3) Uani 1 1 d . . .
Ru' Ru 0.581436(14) 0.052608(8) 0.076646(4) 0.01213(3) Uani 1 1 d . . .
HA H 1.060(3) -0.4832(19) 0.1982(8) 0.079(10) Uiso 1 1 d . . .
HA' H 0.550(3) 0.1162(18) 0.0508(8) 0.067(9) Uiso 1 1 d . . .
 
loop_
    _atom_site_aniso_label
    _atom_site_aniso_U_11
    _atom_site_aniso_U_22
    _atom_site_aniso_U_33
    _atom_site_aniso_U_23
    _atom_site_aniso_U_13
    _atom_site_aniso_U_12
C1 0.0242(11) 0.0406(12) 0.0206(10) -0.0049(9) 0.0056(8) 0.0023(9)
C2 0.0169(10) 0.0313(10) 0.0295(11) -0.0003(8) -0.0040(8) -0.0031(8)
C3 0.0429(12) 0.0156(8) 0.0219(9) -0.0031(7) 0.0034(9) 0.0027(9)
C4 0.0300(12) 0.0301(10) 0.0179(9) 0.0050(8) -0.0004(8) -0.0048(8)
C5 0.0327(12) 0.0314(11) 0.0205(9) 0.0009(8) 0.0017(9) -0.0145(9)
C6 0.0258(10) 0.0458(14) 0.0335(11) 0.0126(10) -0.0110(9) -0.0021(10)
C7 0.0283(11) 0.0354(11) 0.0199(10) -0.0055(8) -0.0018(8) -0.0090(9)
C8 0.0546(15) 0.0227(10) 0.0247(10) 0.0014(8) -0.0048(10) 0.0196(10)
C9 0.0229(11) 0.0368(12) 0.0422(13) -0.0050(10) 0.0069(9) 0.0117(9)
C10 0.0119(8) 0.0218(9) 0.0196(9) -0.0063(7) -0.0039(7) -0.0007(7)
C11 0.0201(10) 0.0279(10) 0.0256(10) -0.0117(8) -0.0034(8) 0.0040(8)
C12 0.0265(11) 0.0198(9) 0.0394(12) -0.0105(9) -0.0121(9) 0.0082(8)
C13 0.0270(11) 0.0160(9) 0.0373(12) 0.0018(8) -0.0042(9) 0.0017(8)
C14 0.0198(10) 0.0164(8) 0.0278(10) 0.0022(7) -0.0001(8) 0.0004(7)
C16 0.0158(9) 0.0148(8) 0.0221(9) -0.0006(7) 0.0012(7) 0.0030(7)
C17 0.0186(9) 0.0190(9) 0.0274(10) -0.0018(8) 0.0053(8) -0.0020(7)
C18 0.0263(10) 0.0206(9) 0.0238(10) 0.0028(8) 0.0100(8) -0.0001(8)
C19 0.0276(10) 0.0245(10) 0.0152(9) 0.0004(7) 0.0024(8) 0.0003(8)
C20 0.0185(9) 0.0204(9) 0.0180(9) 0.0004(7) -0.0007(7) 0.0016(7)
C23 0.0186(9) 0.0182(8) 0.0260(9) 0.0047(8) -0.0002(8) -0.0004(8)
C24 0.0200(10) 0.0314(11) 0.0365(11) 0.0092(9) -0.0097(9) 0.0001(9)
C25 0.0316(12) 0.0344(12) 0.0342(12) 0.0065(9) -0.0178(9) -0.0105(9)
C26 0.0355(11) 0.0209(10) 0.0233(9) -0.0005(8) -0.0068(8) -0.0053(9)
C27 0.0215(9) 0.0164(8) 0.0142(8) 0.0025(7) 0.0019(7) -0.0024(7)
C51 0.0157(9) 0.0302(11) 0.0560(15) -0.0108(11) -0.0012(9) -0.0045(8)
C52 0.0385(12) 0.0294(11) 0.0297(11) -0.0146(9) -0.0098(10) 0.0145(10)
C53 0.0231(10) 0.0330(11) 0.0213(9) -0.0015(8) 0.0082(8) -0.0036(9)
C54 0.0315(11) 0.0305(10) 0.0329(11) -0.0142(9) -0.0054(9) 0.0003(10)
C55 0.0278(11) 0.0332(11) 0.0388(12) -0.0046(10) -0.0154(9) 0.0054(10)
C56 0.0337(11) 0.0178(9) 0.0285(10) -0.0021(7) -0.0036(9) 0.0074(8)
C57 0.0201(10) 0.0340(11) 0.0307(11) -0.0042(9) 0.0047(9) 0.0097(9)
C58 0.0265(11) 0.0364(12) 0.0207(10) 0.0089(9) -0.0028(8) -0.0010(9)
C59 0.0274(11) 0.0234(10) 0.0263(10) 0.0024(8) 0.0008(9) -0.0081(8)
C60 0.0152(9) 0.0130(8) 0.0356(11) -0.0031(8) 0.0065(8) 0.0055(7)
C61 0.0185(9) 0.0177(9) 0.0493(13) -0.0010(9) 0.0132(9) 0.0005(8)
C62 0.0299(10) 0.0223(9) 0.0405(12) 0.0095(9) 0.0210(10) 0.0065(8)
C63 0.0304(11) 0.0273(10) 0.0264(10) 0.0074(8) 0.0102(8) 0.0079(9)
C64 0.0197(9) 0.0188(8) 0.0235(9) 0.0020(7) 0.0049(8) 0.0039(8)
C65 0.0188(9) 0.0145(8) 0.0158(8) 0.0032(7) 0.0004(7) -0.0012(7)
C66 0.0271(10) 0.0195(9) 0.0174(9) -0.0012(7) -0.0053(8) -0.0038(8)
C67 0.0240(11) 0.0242(9) 0.0216(9) 0.0032(7) -0.0092(8) -0.0055(8)
C68 0.0162(8) 0.0237(9) 0.0268(9) 0.0059(7) -0.0028(8) 0.0024(8)
C69 0.0171(8) 0.0177(8) 0.0195(9) 0.0026(7) 0.0010(7) 0.0010(7)
C70 0.0120(8) 0.0197(9) 0.0161(8) -0.0048(7) -0.0018(6) -0.0019(7)
C71 0.0162(9) 0.0266(10) 0.0210(9) -0.0056(8) -0.0013(8) 0.0028(8)
C72 0.0251(10) 0.0196(9) 0.0292(11) -0.0083(8) -0.0045(9) 0.0072(8)
C73 0.0304(11) 0.0150(8) 0.0323(11) 0.0030(8) 0.0030(9) 0.0027(8)
C74 0.0202(9) 0.0173(8) 0.0239(10) 0.0008(7) 0.0034(8) 0.0014(7)
N1 0.0191(8) 0.0249(8) 0.0173(8) -0.0037(6) 0.0028(6) -0.0012(7)
N2 0.0156(7) 0.0237(8) 0.0214(8) 0.0007(7) -0.0029(7) -0.0017(6)
N3 0.0270(9) 0.0133(6) 0.0167(7) -0.0024(6) 0.0003(6) 0.0042(7)
N7 0.0145(7) 0.0203(7) 0.0372(9) -0.0067(8) 0.0004(7) -0.0010(6)
N8 0.0231(9) 0.0183(7) 0.0200(8) -0.0073(6) -0.0042(7) 0.0065(6)
N9 0.0185(8) 0.0218(8) 0.0162(7) -0.0008(6) 0.0041(6) -0.0022(6)
NA 0.0161(8) 0.0152(7) 0.0165(7) 0.0006(6) 0.0000(6) 0.0007(6)
NA' 0.0152(7) 0.0136(7) 0.0224(7) 0.0008(6) 0.0028(6) 0.0027(6)
NB 0.0148(7) 0.0146(7) 0.0193(8) -0.0037(6) -0.0019(6) -0.0003(6)
NB' 0.0139(7) 0.0133(7) 0.0180(7) -0.0007(6) 0.0007(6) 0.0008(6)
NC 0.0149(7) 0.0147(7) 0.0146(7) 0.0014(6) 0.0007(6) 0.0000(6)
NC' 0.0149(7) 0.0144(7) 0.0138(7) 0.0022(6) 0.0012(6) 0.0004(6)
SiA 0.0191(2) 0.0194(2) 0.0141(2) 0.00076(19) 0.00036(19) -0.0056(2)
SiA' 0.0167(2) 0.0169(2) 0.0157(2) 0.00266(18) -0.00082(19) -0.00320(19)
SiB 0.0189(2) 0.0168(2) 0.0186(2) -0.0003(2) -0.00058(19) 0.0067(2)
SiB' 0.0155(2) 0.0150(2) 0.0180(2) -0.00224(18) -0.0012(2) 0.00452(19)
SiC' 0.0187(3) 0.0198(2) 0.0241(3) -0.0065(2) -0.0060(2) 0.0027(2)
SiC 0.0173(3) 0.0242(3) 0.0162(2) 0.0021(2) -0.0037(2) 0.0003(2)
Ru 0.01378(6) 0.01120(6) 0.01308(6) 0.00057(5) 0.00045(5) 0.00063(5)
Ru' 0.01246(6) 0.01084(6) 0.01310(6) -0.00032(5) -0.00001(5) 0.00090(5)
 
 
#----------------------------------------------------------------------------#
#                   MOLECULAR GEOMETRY                                       #
#----------------------------------------------------------------------------#
 
_geom_special_details
;
 All s.u.'s (except the s.u. in the dihedral angle between two l.s. planes)
 are estimated using the full covariance matrix.  The cell s.u.'s are taken
 into account individually in the estimation of s.u.'s in distances, angles
 and torsion angles; correlations between s.u.'s in cell parameters are only
 used when they are defined by crystal symmetry.  An approximate (isotropic)
 treatment of cell s.u.'s is used for estimating s.u.'s involving l.s. planes.
;
loop_
    _geom_bond_atom_site_label_1
    _geom_bond_atom_site_label_2
    _geom_bond_distance
    _geom_bond_site_symmetry_2
    _geom_bond_publ_flag
C1 N1 1.470(2) . ?
C1 H1A 0.98 . ?
C1 H1B 0.98 . ?
C1 H1C 0.98 . ?
C2 N2 1.464(2) . ?
C2 H2A 0.98 . ?
C2 H2B 0.98 . ?
C2 H2C 0.98 . ?
C3 N3 1.471(2) . ?
C3 H3A 0.98 . ?
C3 H3B 0.98 . ?
C3 H3C 0.98 . ?
C4 SiA 1.8814(19) . ?
C4 H4A 0.98 . ?
C4 H4B 0.98 . ?
C4 H4C 0.98 . ?
C5 SiA 1.888(2) . ?
C5 H5A 0.98 . ?
C5 H5B 0.98 . ?
C5 H5C 0.98 . ?
C6 SiC 1.898(2) . ?
C6 H6A 0.98 . ?
C6 H6B 0.98 . ?
C6 H6C 0.98 . ?
C7 SiC 1.898(2) . ?
C7 H7A 0.98 . ?
C7 H7B 0.98 . ?
C7 H7C 0.98 . ?
C8 SiB 1.893(2) . ?
C8 H8A 0.98 . ?
C8 H8B 0.98 . ?
C8 H8C 0.98 . ?
C9 SiB 1.885(2) . ?
C9 H9A 0.98 . ?
C9 H9B 0.98 . ?
C9 H9C 0.98 . ?
C10 N1 1.355(2) . ?
C10 NB 1.362(2) . ?
C10 C11 1.419(3) . ?
C11 C12 1.367(3) . ?
C11 H11 0.95 . ?
C12 C13 1.380(3) . ?
C12 H12 0.95 . ?
C13 C14 1.375(3) . ?
C13 H13 0.95 . ?
C14 NB 1.352(2) . ?
C14 H14 0.95 . ?
C16 N2 1.354(2) . ?
C16 NA 1.369(2) . ?
C16 C17 1.415(3) . ?
C17 C18 1.365(3) . ?
C17 H17 0.95 . ?
C18 C19 1.398(3) . ?
C18 H18 0.95 . ?
C19 C20 1.369(3) . ?
C19 H19 0.95 . ?
C20 NA 1.352(2) . ?
C20 H20 0.95 . ?
C23 NC 1.348(2) . ?
C23 C24 1.370(3) . ?
C23 H23 0.95 . ?
C24 C25 1.389(3) . ?
C24 H24 0.95 . ?
C25 C26 1.360(3) . ?
C25 H25 0.95 . ?
C26 C27 1.415(3) . ?
C26 H26 0.95 . ?
C27 N3 1.354(2) . ?
C27 NC 1.370(2) . ?
C51 N7 1.463(2) . ?
C51 H51A 0.98 . ?
C51 H51B 0.98 . ?
C51 H51C 0.98 . ?
C52 N8 1.464(2) . ?
C52 H52A 0.98 . ?
C52 H52B 0.98 . ?
C52 H52C 0.98 . ?
C53 N9 1.458(2) . ?
C53 H53A 0.98 . ?
C53 H53B 0.98 . ?
C53 H53C 0.98 . ?
C54 SiC' 1.895(2) . ?
C54 H54A 0.98 . ?
C54 H54B 0.98 . ?
C54 H54C 0.98 . ?
C55 SiC' 1.893(2) . ?
C55 H55A 0.98 . ?
C55 H55B 0.98 . ?
C55 H55C 0.98 . ?
C56 SiB' 1.8854(19) . ?
C56 H56A 0.98 . ?
C56 H56B 0.98 . ?
C56 H56C 0.98 . ?
C57 SiB' 1.886(2) . ?
C57 H57A 0.98 . ?
C57 H57B 0.98 . ?
C57 H57C 0.98 . ?
C58 SiA' 1.881(2) . ?
C58 H58A 0.98 . ?
C58 H58B 0.98 . ?
C58 H58C 0.98 . ?
C59 SiA' 1.882(2) . ?
C59 H59A 0.98 . ?
C59 H59B 0.98 . ?
C59 H59C 0.98 . ?
C60 N7 1.357(3) . ?
C60 NA' 1.367(2) . ?
C60 C61 1.421(3) . ?
C61 C62 1.363(3) . ?
C61 H61 0.95 . ?
C62 C63 1.391(3) . ?
C62 H62 0.95 . ?
C63 C64 1.374(3) . ?
C63 H63 0.95 . ?
C64 NA' 1.350(2) . ?
C64 H64 0.95 . ?
C65 NC' 1.361(2) . ?
C65 N8 1.363(2) . ?
C65 C66 1.415(3) . ?
C66 C67 1.366(3) . ?
C66 H66 0.95 . ?
C67 C68 1.391(3) . ?
C67 H67 0.95 . ?
C68 C69 1.374(3) . ?
C68 H68 0.95 . ?
C69 NC' 1.347(2) . ?
C69 H69 0.95 . ?
C70 N9 1.351(2) . ?
C70 NB' 1.374(2) . ?
C70 C71 1.408(3) . ?
C71 C72 1.374(3) . ?
C71 H71 0.95 . ?
C72 C73 1.386(3) . ?
C72 H72 0.95 . ?
C73 C74 1.376(3) . ?
C73 H73 0.95 . ?
C74 NB' 1.348(2) . ?
C74 H74 0.95 . ?
N1 SiA 1.7997(17) . ?
N2 SiC 1.8095(17) . ?
N3 SiB 1.7925(16) . ?
N7 SiC' 1.8128(18) . ?
N8 SiB' 1.7967(16) . ?
N9 SiA' 1.8012(16) . ?
NA Ru 2.2233(15) . ?
NA' Ru' 2.2129(15) . ?
NB Ru 2.2277(14) . ?
NB' Ru' 2.2387(14) . ?
NC Ru 2.2268(15) . ?
NC' Ru' 2.2264(14) . ?
SiA Ru 2.3213(5) . ?
SiA HA 1.97(3) . ?
SiA' Ru' 2.3266(5) . ?
SiA' HA' 1.89(3) . ?
SiB HA 2.00(3) . ?
SiB Ru 2.3264(5) . ?
SiB' HA' 2.11(3) . ?
SiB' Ru' 2.3225(5) . ?
SiC' Ru' 2.3042(5) . ?
SiC' HA' 2.33(3) . ?
SiC Ru 2.3117(5) . ?
SiC HA 2.33(3) . ?
Ru HA 1.42(3) . ?
Ru' HA' 1.43(3) . ?
 
loop_
    _geom_angle_atom_site_label_1
    _geom_angle_atom_site_label_2
    _geom_angle_atom_site_label_3
    _geom_angle
    _geom_angle_site_symmetry_1
    _geom_angle_site_symmetry_3
    _geom_angle_publ_flag
N1 C1 H1A 109.5 . . ?
N1 C1 H1B 109.5 . . ?
H1A C1 H1B 109.5 . . ?
N1 C1 H1C 109.5 . . ?
H1A C1 H1C 109.5 . . ?
H1B C1 H1C 109.5 . . ?
N2 C2 H2A 109.5 . . ?
N2 C2 H2B 109.5 . . ?
H2A C2 H2B 109.5 . . ?
N2 C2 H2C 109.5 . . ?
H2A C2 H2C 109.5 . . ?
H2B C2 H2C 109.5 . . ?
N3 C3 H3A 109.5 . . ?
N3 C3 H3B 109.5 . . ?
H3A C3 H3B 109.5 . . ?
N3 C3 H3C 109.5 . . ?
H3A C3 H3C 109.5 . . ?
H3B C3 H3C 109.5 . . ?
SiA C4 H4A 109.5 . . ?
SiA C4 H4B 109.5 . . ?
H4A C4 H4B 109.5 . . ?
SiA C4 H4C 109.5 . . ?
H4A C4 H4C 109.5 . . ?
H4B C4 H4C 109.5 . . ?
SiA C5 H5A 109.5 . . ?
SiA C5 H5B 109.5 . . ?
H5A C5 H5B 109.5 . . ?
SiA C5 H5C 109.5 . . ?
H5A C5 H5C 109.5 . . ?
H5B C5 H5C 109.5 . . ?
SiC C6 H6A 109.5 . . ?
SiC C6 H6B 109.5 . . ?
H6A C6 H6B 109.5 . . ?
SiC C6 H6C 109.5 . . ?
H6A C6 H6C 109.5 . . ?
H6B C6 H6C 109.5 . . ?
SiC C7 H7A 109.5 . . ?
SiC C7 H7B 109.5 . . ?
H7A C7 H7B 109.5 . . ?
SiC C7 H7C 109.5 . . ?
H7A C7 H7C 109.5 . . ?
H7B C7 H7C 109.5 . . ?
SiB C8 H8A 109.5 . . ?
SiB C8 H8B 109.5 . . ?
H8A C8 H8B 109.5 . . ?
SiB C8 H8C 109.5 . . ?
H8A C8 H8C 109.5 . . ?
H8B C8 H8C 109.5 . . ?
SiB C9 H9A 109.5 . . ?
SiB C9 H9B 109.5 . . ?
H9A C9 H9B 109.5 . . ?
SiB C9 H9C 109.5 . . ?
H9A C9 H9C 109.5 . . ?
H9B C9 H9C 109.5 . . ?
N1 C10 NB 117.18(16) . . ?
N1 C10 C11 122.78(17) . . ?
NB C10 C11 120.04(17) . . ?
C12 C11 C10 120.08(19) . . ?
C12 C11 H11 120 . . ?
C10 C11 H11 120 . . ?
C11 C12 C13 119.56(18) . . ?
C11 C12 H12 120.2 . . ?
C13 C12 H12 120.2 . . ?
C14 C13 C12 118.39(19) . . ?
C14 C13 H13 120.8 . . ?
C12 C13 H13 120.8 . . ?
NB C14 C13 123.92(18) . . ?
NB C14 H14 118 . . ?
C13 C14 H14 118 . . ?
N2 C16 NA 117.32(16) . . ?
N2 C16 C17 122.92(17) . . ?
NA C16 C17 119.75(17) . . ?
C18 C17 C16 120.31(18) . . ?
C18 C17 H17 119.8 . . ?
C16 C17 H17 119.8 . . ?
C17 C18 C19 119.91(18) . . ?
C17 C18 H18 120 . . ?
C19 C18 H18 120 . . ?
C20 C19 C18 117.30(18) . . ?
C20 C19 H19 121.4 . . ?
C18 C19 H19 121.4 . . ?
NA C20 C19 124.70(18) . . ?
NA C20 H20 117.6 . . ?
C19 C20 H20 117.6 . . ?
NC C23 C24 124.45(19) . . ?
NC C23 H23 117.8 . . ?
C24 C23 H23 117.8 . . ?
C23 C24 C25 117.56(19) . . ?
C23 C24 H24 121.2 . . ?
C25 C24 H24 121.2 . . ?
C26 C25 C24 120.12(19) . . ?
C26 C25 H25 119.9 . . ?
C24 C25 H25 119.9 . . ?
C25 C26 C27 120.09(19) . . ?
C25 C26 H26 120 . . ?
C27 C26 H26 120 . . ?
N3 C27 NC 117.18(16) . . ?
N3 C27 C26 123.03(17) . . ?
NC C27 C26 119.80(17) . . ?
N7 C51 H51A 109.5 . . ?
N7 C51 H51B 109.5 . . ?
H51A C51 H51B 109.5 . . ?
N7 C51 H51C 109.5 . . ?
H51A C51 H51C 109.5 . . ?
H51B C51 H51C 109.5 . . ?
N8 C52 H52A 109.5 . . ?
N8 C52 H52B 109.5 . . ?
H52A C52 H52B 109.5 . . ?
N8 C52 H52C 109.5 . . ?
H52A C52 H52C 109.5 . . ?
H52B C52 H52C 109.5 . . ?
N9 C53 H53A 109.5 . . ?
N9 C53 H53B 109.5 . . ?
H53A C53 H53B 109.5 . . ?
N9 C53 H53C 109.5 . . ?
H53A C53 H53C 109.5 . . ?
H53B C53 H53C 109.5 . . ?
SiC' C54 H54A 109.5 . . ?
SiC' C54 H54B 109.5 . . ?
H54A C54 H54B 109.5 . . ?
SiC' C54 H54C 109.5 . . ?
H54A C54 H54C 109.5 . . ?
H54B C54 H54C 109.5 . . ?
SiC' C55 H55A 109.5 . . ?
SiC' C55 H55B 109.5 . . ?
H55A C55 H55B 109.5 . . ?
SiC' C55 H55C 109.5 . . ?
H55A C55 H55C 109.5 . . ?
H55B C55 H55C 109.5 . . ?
SiB' C56 H56A 109.5 . . ?
SiB' C56 H56B 109.5 . . ?
H56A C56 H56B 109.5 . . ?
SiB' C56 H56C 109.5 . . ?
H56A C56 H56C 109.5 . . ?
H56B C56 H56C 109.5 . . ?
SiB' C57 H57A 109.5 . . ?
SiB' C57 H57B 109.5 . . ?
H57A C57 H57B 109.5 . . ?
SiB' C57 H57C 109.5 . . ?
H57A C57 H57C 109.5 . . ?
H57B C57 H57C 109.5 . . ?
SiA' C58 H58A 109.5 . . ?
SiA' C58 H58B 109.5 . . ?
H58A C58 H58B 109.5 . . ?
SiA' C58 H58C 109.5 . . ?
H58A C58 H58C 109.5 . . ?
H58B C58 H58C 109.5 . . ?
SiA' C59 H59A 109.5 . . ?
SiA' C59 H59B 109.5 . . ?
H59A C59 H59B 109.5 . . ?
SiA' C59 H59C 109.5 . . ?
H59A C59 H59C 109.5 . . ?
H59B C59 H59C 109.5 . . ?
N7 C60 NA' 117.36(17) . . ?
N7 C60 C61 123.26(18) . . ?
NA' C60 C61 119.38(18) . . ?
C62 C61 C60 120.36(19) . . ?
C62 C61 H61 119.8 . . ?
C60 C61 H61 119.8 . . ?
C61 C62 C63 120.12(18) . . ?
C61 C62 H62 119.9 . . ?
C63 C62 H62 119.9 . . ?
C64 C63 C62 117.24(19) . . ?
C64 C63 H63 121.4 . . ?
C62 C63 H63 121.4 . . ?
NA' C64 C63 124.61(19) . . ?
NA' C64 H64 117.7 . . ?
C63 C64 H64 117.7 . . ?
NC' C65 N8 116.97(16) . . ?
NC' C65 C66 120.20(17) . . ?
N8 C65 C66 122.82(17) . . ?
C67 C66 C65 120.01(17) . . ?
C67 C66 H66 120 . . ?
C65 C66 H66 120 . . ?
C66 C67 C68 119.82(17) . . ?
C66 C67 H67 120.1 . . ?
C68 C67 H67 120.1 . . ?
C69 C68 C67 117.49(17) . . ?
C69 C68 H68 121.3 . . ?
C67 C68 H68 121.3 . . ?
NC' C69 C68 124.51(17) . . ?
NC' C69 H69 117.7 . . ?
C68 C69 H69 117.7 . . ?
N9 C70 NB' 116.83(15) . . ?
N9 C70 C71 123.12(16) . . ?
NB' C70 C71 120.05(16) . . ?
C72 C71 C70 120.61(18) . . ?
C72 C71 H71 119.7 . . ?
C70 C71 H71 119.7 . . ?
C71 C72 C73 119.18(17) . . ?
C71 C72 H72 120.4 . . ?
C73 C72 H72 120.4 . . ?
C74 C73 C72 117.96(18) . . ?
C74 C73 H73 121 . . ?
C72 C73 H73 121 . . ?
NB' C74 C73 124.72(18) . . ?
NB' C74 H74 117.6 . . ?
C73 C74 H74 117.6 . . ?
C10 N1 C1 118.26(16) . . ?
C10 N1 SiA 121.08(13) . . ?
C1 N1 SiA 120.65(13) . . ?
C16 N2 C2 118.06(16) . . ?
C16 N2 SiC 121.12(13) . . ?
C2 N2 SiC 120.82(13) . . ?
C27 N3 C3 117.63(16) . . ?
C27 N3 SiB 121.62(12) . . ?
C3 N3 SiB 120.68(13) . . ?
C60 N7 C51 118.11(17) . . ?
C60 N7 SiC' 121.11(13) . . ?
C51 N7 SiC' 120.72(15) . . ?
C65 N8 C52 117.70(16) . . ?
C65 N8 SiB' 121.04(12) . . ?
C52 N8 SiB' 121.09(13) . . ?
C70 N9 C53 118.44(16) . . ?
C70 N9 SiA' 121.76(12) . . ?
C53 N9 SiA' 119.52(13) . . ?
C20 NA C16 118.02(16) . . ?
C20 NA Ru 121.94(12) . . ?
C16 NA Ru 119.95(12) . . ?
C64 NA' C60 118.27(16) . . ?
C64 NA' Ru' 121.70(12) . . ?
C60 NA' Ru' 119.95(12) . . ?
C14 NB C10 118.01(15) . . ?
C14 NB Ru 121.50(12) . . ?
C10 NB Ru 120.15(11) . . ?
C74 NB' C70 117.47(15) . . ?
C74 NB' Ru' 122.00(12) . . ?
C70 NB' Ru' 120.33(11) . . ?
C23 NC C27 117.97(16) . . ?
C23 NC Ru 121.77(12) . . ?
C27 NC Ru 120.08(12) . . ?
C69 NC' C65 117.96(15) . . ?
C69 NC' Ru' 121.34(12) . . ?
C65 NC' Ru' 120.65(12) . . ?
N1 SiA C4 105.00(8) . . ?
N1 SiA C5 105.42(9) . . ?
C4 SiA C5 103.32(9) . . ?
N1 SiA Ru 100.61(5) . . ?
C4 SiA Ru 121.44(7) . . ?
C5 SiA Ru 119.12(7) . . ?
N1 SiA HA 129.2(9) . . ?
C4 SiA HA 87.6(9) . . ?
C5 SiA HA 119.4(9) . . ?
Ru SiA HA 37.6(9) . . ?
N9 SiA' C58 103.98(9) . . ?
N9 SiA' C59 105.57(9) . . ?
C58 SiA' C59 104.10(9) . . ?
N9 SiA' Ru' 100.89(5) . . ?
C58 SiA' Ru' 121.39(7) . . ?
C59 SiA' Ru' 118.80(7) . . ?
N9 SiA' HA' 131.8(9) . . ?
C58 SiA' HA' 89.1(9) . . ?
C59 SiA' HA' 115.9(9) . . ?
Ru' SiA' HA' 37.8(9) . . ?
N3 SiB C9 105.76(9) . . ?
N3 SiB C8 104.04(9) . . ?
C9 SiB C8 103.97(11) . . ?
N3 SiB HA 118.5(9) . . ?
C9 SiB HA 131.1(9) . . ?
C8 SiB HA 85.1(9) . . ?
N3 SiB Ru 100.69(5) . . ?
C9 SiB Ru 118.11(8) . . ?
C8 SiB Ru 122.20(7) . . ?
HA SiB Ru 37.4(9) . . ?
N8 SiB' C56 104.63(9) . . ?
N8 SiB' C57 104.40(9) . . ?
C56 SiB' C57 104.63(10) . . ?
N8 SiB' HA' 119.8(8) . . ?
C56 SiB' HA' 84.5(8) . . ?
C57 SiB' HA' 131.1(8) . . ?
N8 SiB' Ru' 100.81(5) . . ?
C56 SiB' Ru' 121.06(6) . . ?
C57 SiB' Ru' 119.03(7) . . ?
HA' SiB' Ru' 37.2(8) . . ?
N7 SiC' C55 104.98(9) . . ?
N7 SiC' C54 103.14(9) . . ?
C55 SiC' C54 102.98(10) . . ?
N7 SiC' Ru' 100.32(6) . . ?
C55 SiC' Ru' 122.17(7) . . ?
C54 SiC' Ru' 120.54(7) . . ?
N7 SiC' HA' 127.1(7) . . ?
C55 SiC' HA' 89.5(7) . . ?
C54 SiC' HA' 123.0(7) . . ?
Ru' SiC' HA' 35.9(7) . . ?
N2 SiC C7 103.82(9) . . ?
N2 SiC C6 103.88(9) . . ?
C7 SiC C6 103.82(10) . . ?
N2 SiC Ru 100.47(5) . . ?
C7 SiC Ru 119.14(7) . . ?
C6 SiC Ru 122.93(8) . . ?
N2 SiC HA 122.4(7) . . ?
C7 SiC HA 127.6(8) . . ?
C6 SiC HA 88.7(8) . . ?
Ru SiC HA 35.7(8) . . ?
NA Ru NC 91.43(5) . . ?
NA Ru NB 89.09(5) . . ?
NC Ru NB 91.23(5) . . ?
NA Ru SiC 80.71(4) . . ?
NC Ru SiC 172.12(4) . . ?
NB Ru SiC 88.08(4) . . ?
NA Ru SiA 168.93(4) . . ?
NC Ru SiA 90.60(4) . . ?
NB Ru SiA 79.99(4) . . ?
SiC Ru SiA 97.011(19) . . ?
NA Ru SiB 86.79(4) . . ?
NC Ru SiB 80.29(4) . . ?
NB Ru SiB 170.46(4) . . ?
SiC Ru SiB 99.720(19) . . ?
SiA Ru SiB 104.282(19) . . ?
NA Ru HA 130.6(13) . . ?
NC Ru HA 113.2(13) . . ?
NB Ru HA 129.8(12) . . ?
SiC Ru HA 72.9(13) . . ?
SiA Ru HA 57.8(13) . . ?
SiB Ru HA 58.5(12) . . ?
NA' Ru' NC' 90.78(5) . . ?
NA' Ru' NB' 88.43(5) . . ?
NC' Ru' NB' 92.01(5) . . ?
NA' Ru' SiC' 81.24(4) . . ?
NC' Ru' SiC' 171.87(4) . . ?
NB' Ru' SiC' 89.37(4) . . ?
NA' Ru' SiB' 85.48(4) . . ?
NC' Ru' SiB' 80.09(4) . . ?
NB' Ru' SiB' 169.94(4) . . ?
SiC' Ru' SiB' 97.583(19) . . ?
NA' Ru' SiA' 168.47(4) . . ?
NC' Ru' SiA' 89.77(4) . . ?
NB' Ru' SiA' 80.04(4) . . ?
SiC' Ru' SiA' 98.362(19) . . ?
SiB' Ru' SiA' 105.953(18) . . ?
NA' Ru' HA' 135.4(12) . . ?
NC' Ru' HA' 112.4(12) . . ?
NB' Ru' HA' 126.1(12) . . ?
SiC' Ru' HA' 72.9(12) . . ?
SiB' Ru' HA' 63.3(12) . . ?
SiA' Ru' HA' 54.3(12) . . ?
 
# The following lines are used to test the character set of files sent by
# network email or other means. They are not part of the CIF data set
# abcdefghijklmnopqrstuvwxyzABCDEFGHIJKLMNOPQRSTUVWXYZ0123456789
# !@#$%^&*()_+{}:"~<>?|\-=[];'`,./
 
# END
data_KSO070212
#----------------------------------------------------------------------------#
#                   CHEMICAL INFORMATION                                     #
#----------------------------------------------------------------------------#
 
_chemical_name_systematic
;
 ?
;
_chemical_formula_moiety         'C32 H12 B F24, C24 H41 N6 Ru Si3'
_chemical_formula_sum                   'C56 H53 B F24 N6 Ru Si3'
_chemical_formula_weight                1462.19
_chemical_compound_source               'synthesis as described'
_chemical_absolute_configuration        ad
 
#----------------------------------------------------------------------------#
#                   UNIT CELL INFORMATION                                    #
#----------------------------------------------------------------------------#
 
_symmetry_cell_setting                  monoclinic
_symmetry_space_group_name_H-M          'P 1 n 1'
_symmetry_space_group_name_Hall         'P -2yac'
_symmetry_Int_Tables_number             7
loop_
    _symmetry_equiv_pos_as_xyz
'x, y, z'
'x+1/2, -y, z+1/2'
 
_cell_length_a                          13.9065(3)
_cell_length_b                          12.1742(3)
_cell_length_c                          18.3076(4)
_cell_angle_alpha                       90
_cell_angle_beta                        94.385(2)
_cell_angle_gamma                       90
_cell_volume                            3090.41(12)
_cell_formula_units_Z                   2
_cell_measurement_temperature           100(2)
_cell_measurement_reflns_used           21738
_cell_measurement_theta_min             2.934
_cell_measurement_theta_max             29.3051
_cell_measurement_wavelength            0.71073
 
#----------------------------------------------------------------------------#
#                   CRYSTAL INFORMATION                                      #
#----------------------------------------------------------------------------#
 
_exptl_crystal_description              platelet
_exptl_crystal_colour                   'pale yellow'
_exptl_crystal_size_max                 0.17
_exptl_crystal_size_mid                 0.1
_exptl_crystal_size_min                 0.02
_exptl_crystal_density_diffrn           1.571
_exptl_crystal_density_method           'not measured'
_exptl_crystal_F_000                    1476
_exptl_special_details
;
 ?
;
 
#----------------------------------------------------------------------------#
#                   ABSORPTION CORRECTION                                    #
#----------------------------------------------------------------------------#
 
_exptl_absorpt_coefficient_mu           0.428
_exptl_absorpt_correction_type          multi-scan
_exptl_absorpt_process_details
;
        CrysAlisPro, Agilent Technologies,
        Version 1.171.35.19 (release 27-10-2011 CrysAlis171 .NET)
        (compiled Oct 27 2011,15:02:11)
        Empirical absorption correction using spherical harmonics,
 implemented in SCALE3 ABSPACK scaling algorithm.
;
_exptl_absorpt_correction_T_min         0.9265
_exptl_absorpt_correction_T_max         0.9886
 
#----------------------------------------------------------------------------#
#                   DATA COLLECTION                                          #
#----------------------------------------------------------------------------#
 
_diffrn_ambient_temperature             100(2)
_diffrn_radiation_wavelength            0.71073
_diffrn_radiation_type                  MoK\a
_diffrn_radiation_monochromator         graphite
_diffrn_radiation_probe                 x-ray
_diffrn_detector_area_resol_mean        16.1978
_diffrn_orient_matrix_ub_11             -0.0048465
_diffrn_orient_matrix_ub_12             0.0201763
_diffrn_orient_matrix_ub_13             0.0358687
_diffrn_orient_matrix_ub_21             0.042602
_diffrn_orient_matrix_ub_22             0.031558
_diffrn_orient_matrix_ub_23             -0.0019954
_diffrn_orient_matrix_ub_31             -0.0279501
_diffrn_orient_matrix_ub_32             0.044522
_diffrn_orient_matrix_ub_33             -0.0148333
_diffrn_measurement_device_type         'Xcalibur, Eos, Gemini ultra'
_diffrn_measurement_method              '\w scans'
_diffrn_reflns_av_R_equivalents         0.0429
_diffrn_reflns_av_unetI/netI            0.0314
_diffrn_reflns_number                   61811
_diffrn_reflns_limit_h_min              -17
_diffrn_reflns_limit_h_max              17
_diffrn_reflns_limit_k_min              -15
_diffrn_reflns_limit_k_max              15
_diffrn_reflns_limit_l_min              -22
_diffrn_reflns_limit_l_max              22
_diffrn_reflns_theta_min                2.94
_diffrn_reflns_theta_max                26.37
_diffrn_reflns_theta_full               26.37
_diffrn_measured_fraction_theta_full
                                        0.999
_diffrn_measured_fraction_theta_max
                                        0.999
_reflns_number_total                    12620
_reflns_number_gt                       11747
_reflns_threshold_expression            >2\s(I)
 
#----------------------------------------------------------------------------#
#                   COMPUTER PROGRAMS USED                                   #
#----------------------------------------------------------------------------#
 
_computing_data_collection
;
        CrysAlisPro, Agilent Technologies,
        Version 1.171.35.19 (release 27-10-2011 CrysAlis171 .NET)
        (compiled Oct 27 2011,15:02:11)
;
_computing_cell_refinement
;
        CrysAlisPro, Agilent Technologies,
        Version 1.171.35.19 (release 27-10-2011 CrysAlis171 .NET)
        (compiled Oct 27 2011,15:02:11)
;
_computing_data_reduction
;
        CrysAlisPro, Agilent Technologies,
        Version 1.171.35.19 (release 27-10-2011 CrysAlis171 .NET)
        (compiled Oct 27 2011,15:02:11)
;
_computing_structure_solution           'SIR92 (Giacovazzo et al, 1993)'
_computing_structure_refinement         'SHELXL-97 (Sheldrick, 2008)'
_computing_molecular_graphics           'Ortep-3 for Windows (Farrugia, 1997)'
_computing_publication_material
                                   'WinGX publication routines (Farrugia, 1999)'
 
#----------------------------------------------------------------------------#
#                   STRUCTURE SOLUTION
#----------------------------------------------------------------------------#
 
_atom_sites_solution_primary            direct
_atom_sites_solution_secondary          difmap
_atom_sites_solution_hydrogens          geom
 
#----------------------------------------------------------------------------#
#                   REFINEMENT INFORMATION                                   #
#----------------------------------------------------------------------------#
 
_refine_special_details
;
 Refinement of F^2^ against ALL reflections.  The weighted R-factor wR and
 goodness of fit S are based on F^2^, conventional R-factors R are based
 on F, with F set to zero for negative F^2^. The threshold expression of
 F^2^ > 2\s(F^2^) is used only for calculating R-factors(gt) etc. and is
 not relevant to the choice of reflections for refinement.  R-factors based
 on F^2^ are statistically about twice as large as those based on F, and R-
 factors based on ALL data will be even larger.
;
_refine_ls_structure_factor_coef        Fsqd
_refine_ls_matrix_type                  full
_refine_ls_weighting_scheme             calc
_refine_ls_weighting_details
         'calc w=1/[\s^2^(Fo^2^)+(0.0387P)^2^+2.8913P] where P=(Fo^2^+2Fc^2^)/3'
_refine_ls_hydrogen_treatment           mixed
_refine_ls_extinction_method            none
_refine_ls_number_reflns                12620
_refine_ls_number_parameters            837
_refine_ls_number_restraints            2
_refine_ls_R_factor_all                 0.0399
_refine_ls_R_factor_gt                  0.0345
_refine_ls_wR_factor_ref                0.0854
_refine_ls_wR_factor_gt                 0.0809
_refine_ls_goodness_of_fit_ref          1.041
_refine_ls_restrained_S_all             1.041
_refine_ls_shift/su_max                 0.004
_refine_ls_shift/su_mean                0
_refine_ls_abs_structure_details
                                    'Flack H D (1983), Acta Cryst. A39, 876-881'
_refine_ls_abs_structure_Flack          -0.047(15)
_refine_diff_density_max                0.949
_refine_diff_density_min                -0.413
_refine_diff_density_rms                0.059
 
#----------------------------------------------------------------------------#
#                   ATOMIC TYPES, COORDINATES AND THERMAL PARAMETERS         #
#----------------------------------------------------------------------------#
 
loop_
    _atom_type_symbol
    _atom_type_description
    _atom_type_scat_dispersion_real
    _atom_type_scat_dispersion_imag
    _atom_type_scat_source
C C 0.0033 0.0016 'International Tables Vol C Tables 4.2.6.8 and 6.1.1.4'
H H 0 0 'International Tables Vol C Tables 4.2.6.8 and 6.1.1.4'
N N 0.0061 0.0033 'International Tables Vol C Tables 4.2.6.8 and 6.1.1.4'
Si Si 0.0817 0.0704 'International Tables Vol C Tables 4.2.6.8 and 6.1.1.4'
Ru Ru -1.2594 0.8363 'International Tables Vol C Tables 4.2.6.8 and 6.1.1.4'
B B 0.0013 0.0007 'International Tables Vol C Tables 4.2.6.8 and 6.1.1.4'
F F 0.0171 0.0103 'International Tables Vol C Tables 4.2.6.8 and 6.1.1.4'
 
loop_
    _atom_site_label
    _atom_site_type_symbol
    _atom_site_fract_x
    _atom_site_fract_y
    _atom_site_fract_z
    _atom_site_U_iso_or_equiv
    _atom_site_adp_type
    _atom_site_occupancy
    _atom_site_symmetry_multiplicity
    _atom_site_calc_flag
    _atom_site_refinement_flags
    _atom_site_disorder_assembly
    _atom_site_disorder_group
C1 C 0.3920(2) 0.2060(3) 0.28417(17) 0.0238(7) Uani 1 1 d . . .
H1 H 0.4287 0.2379 0.2479 0.029 Uiso 1 1 calc R . .
C2 C 0.3032(2) 0.1642(3) 0.26213(19) 0.0275(7) Uani 1 1 d . . .
H2 H 0.2788 0.1675 0.2123 0.033 Uiso 1 1 calc R . .
C3 C 0.2500(2) 0.1165(3) 0.3151(2) 0.0317(8) Uani 1 1 d . . .
H3 H 0.1885 0.0854 0.3018 0.038 Uiso 1 1 calc R . .
C4 C 0.2872(2) 0.1149(3) 0.38678(19) 0.0295(7) Uani 1 1 d . . .
H4 H 0.2508 0.083 0.4232 0.035 Uiso 1 1 calc R . .
C5 C 0.3786(2) 0.1600(3) 0.40701(17) 0.0238(6) Uani 1 1 d . . .
C6 C 0.3617(3) 0.1151(4) 0.5337(2) 0.0398(9) Uani 1 1 d . . .
H6A H 0.3032 0.1587 0.5382 0.06 Uiso 1 1 calc R . .
H6B H 0.4009 0.1155 0.5806 0.06 Uiso 1 1 calc R . .
H6C H 0.3438 0.0394 0.5206 0.06 Uiso 1 1 calc R . .
C7 C 0.5102(4) 0.3189(4) 0.5795(2) 0.0507(11) Uani 1 1 d . . .
H7A H 0.4594 0.3709 0.5628 0.076 Uiso 1 1 calc R . .
H7B H 0.5697 0.3592 0.5937 0.076 Uiso 1 1 calc R . .
H7C H 0.4901 0.2777 0.6217 0.076 Uiso 1 1 calc R . .
C8 C 0.6064(3) 0.1059(4) 0.5462(2) 0.0418(9) Uani 1 1 d . . .
H8A H 0.5771 0.0804 0.5902 0.063 Uiso 1 1 calc R . .
H8B H 0.6719 0.1323 0.5598 0.063 Uiso 1 1 calc R . .
H8C H 0.6089 0.0451 0.5114 0.063 Uiso 1 1 calc R . .
C11 C 0.6663(2) 0.2611(3) 0.23427(18) 0.0263(7) Uani 1 1 d . . .
H11 H 0.6975 0.2023 0.2607 0.032 Uiso 1 1 calc R . .
C12 C 0.6953(3) 0.2842(3) 0.16611(18) 0.0294(7) Uani 1 1 d . . .
H12 H 0.7444 0.2427 0.1456 0.035 Uiso 1 1 calc R . .
C13 C 0.6498(3) 0.3710(3) 0.12808(18) 0.0335(8) Uani 1 1 d . . .
H13 H 0.6685 0.3905 0.0809 0.04 Uiso 1 1 calc R . .
C14 C 0.5788(3) 0.4279(3) 0.15821(18) 0.0301(7) Uani 1 1 d . . .
H14 H 0.5465 0.4857 0.1316 0.036 Uiso 1 1 calc R . .
C15 C 0.5529(2) 0.4011(3) 0.22917(17) 0.0225(6) Uani 1 1 d . . .
C16 C 0.4352(3) 0.5481(3) 0.2229(2) 0.0383(9) Uani 1 1 d . . .
H16A H 0.4824 0.6026 0.209 0.057 Uiso 1 1 calc R . .
H16B H 0.3897 0.5829 0.254 0.057 Uiso 1 1 calc R . .
H16C H 0.4 0.5189 0.1787 0.057 Uiso 1 1 calc R . .
C17 C 0.3535(3) 0.4608(3) 0.3812(2) 0.0354(8) Uani 1 1 d . . .
H17A H 0.3259 0.5318 0.3653 0.053 Uiso 1 1 calc R . .
H17B H 0.3492 0.4524 0.4341 0.053 Uiso 1 1 calc R . .
H17C H 0.3175 0.4015 0.3553 0.053 Uiso 1 1 calc R . .
C18 C 0.5466(3) 0.5814(3) 0.3951(2) 0.0332(8) Uani 1 1 d . . .
H18A H 0.6128 0.581 0.3802 0.05 Uiso 1 1 calc R . .
H18B H 0.5479 0.5831 0.4487 0.05 Uiso 1 1 calc R . .
H18C H 0.5127 0.6465 0.3748 0.05 Uiso 1 1 calc R . .
C21 C 0.5897(2) 0.0379(3) 0.33730(17) 0.0229(6) Uani 1 1 d . . .
H21 H 0.5286 0.0529 0.3124 0.028 Uiso 1 1 calc R . .
C22 C 0.6244(2) -0.0675(3) 0.33575(18) 0.0274(7) Uani 1 1 d . . .
H22 H 0.589 -0.1235 0.3095 0.033 Uiso 1 1 calc R . .
C23 C 0.7125(3) -0.0903(3) 0.37357(18) 0.0291(7) Uani 1 1 d . . .
H23 H 0.737 -0.1632 0.3751 0.035 Uiso 1 1 calc R . .
C24 C 0.7638(3) -0.0077(3) 0.40854(18) 0.0316(8) Uani 1 1 d . . .
H24 H 0.8244 -0.0229 0.434 0.038 Uiso 1 1 calc R . .
C25 C 0.7268(2) 0.1008(3) 0.40700(17) 0.0258(7) Uani 1 1 d . . .
C26 C 0.8692(3) 0.1637(4) 0.4778(3) 0.0507(12) Uani 1 1 d . . .
H26A H 0.8613 0.1094 0.5164 0.076 Uiso 1 1 calc R . .
H26B H 0.8953 0.2319 0.4998 0.076 Uiso 1 1 calc R . .
H26C H 0.9138 0.135 0.4435 0.076 Uiso 1 1 calc R . .
C27 C 0.7522(3) 0.3840(4) 0.5264(2) 0.0430(10) Uani 1 1 d . . .
H27A H 0.7287 0.3328 0.5623 0.064 Uiso 1 1 calc R . .
H27B H 0.7166 0.4533 0.5279 0.064 Uiso 1 1 calc R . .
H27C H 0.8211 0.3978 0.538 0.064 Uiso 1 1 calc R . .
C28 C 0.8134(3) 0.3994(4) 0.3730(3) 0.0461(10) Uani 1 1 d . . .
H28A H 0.8809 0.3891 0.3912 0.069 Uiso 1 1 calc R . .
H28B H 0.7975 0.4778 0.3735 0.069 Uiso 1 1 calc R . .
H28C H 0.8038 0.3714 0.3228 0.069 Uiso 1 1 calc R . .
C51 C 0.0186(2) 0.7636(3) 0.44897(16) 0.0204(6) Uani 1 1 d . . .
C52 C -0.0679(2) 0.7228(3) 0.47326(17) 0.0224(6) Uani 1 1 d . . .
H52 H -0.0989 0.6631 0.4477 0.027 Uiso 1 1 calc R . .
C53 C -0.1098(2) 0.7667(3) 0.53338(17) 0.0250(7) Uani 1 1 d . . .
C54 C -0.0647(2) 0.8516(3) 0.57403(17) 0.0243(7) Uani 1 1 d . . .
H54 H -0.0924 0.8807 0.6158 0.029 Uiso 1 1 calc R . .
C55 C 0.0212(2) 0.8922(3) 0.55197(16) 0.0229(6) Uani 1 1 d . . .
C56 C 0.0603(2) 0.8508(3) 0.48999(16) 0.0207(6) Uani 1 1 d . . .
H56 H 0.1178 0.883 0.4748 0.025 Uiso 1 1 calc R . .
C57 C -0.2033(3) 0.7215(3) 0.55576(19) 0.0321(8) Uani 1 1 d . . .
C58 C 0.0715(2) 0.9831(3) 0.59510(17) 0.0250(7) Uani 1 1 d . . .
C61 C -0.0200(2) 0.7765(2) 0.31068(16) 0.0185(6) Uani 1 1 d . . .
C62 C -0.1022(2) 0.7225(2) 0.28005(16) 0.0196(6) Uani 1 1 d . . .
H62 H -0.1097 0.6464 0.2896 0.024 Uiso 1 1 calc R . .
C63 C -0.1731(2) 0.7764(3) 0.23619(16) 0.0220(6) Uani 1 1 d . . .
C64 C -0.1661(2) 0.8876(3) 0.22078(16) 0.0226(6) Uani 1 1 d . . .
H64 H -0.2149 0.9243 0.1909 0.027 Uiso 1 1 calc R . .
C65 C -0.0855(2) 0.9433(3) 0.25050(17) 0.0232(6) Uani 1 1 d . . .
C66 C -0.0141(2) 0.8894(3) 0.29443(16) 0.0216(6) Uani 1 1 d . . .
H66 H 0.0402 0.93 0.3141 0.026 Uiso 1 1 calc R . .
C67 C -0.2598(3) 0.7116(3) 0.20671(19) 0.0290(7) Uani 1 1 d . . .
C68 C -0.0725(3) 1.0630(3) 0.2360(2) 0.0321(8) Uani 1 1 d . . .
C71 C 0.0611(2) 0.5882(3) 0.36331(15) 0.0207(6) Uani 1 1 d . . .
C72 C 0.0751(2) 0.5168(3) 0.42285(16) 0.0213(6) Uani 1 1 d . . .
H72 H 0.075 0.5456 0.4711 0.026 Uiso 1 1 calc R . .
C73 C 0.0892(2) 0.4042(3) 0.41368(18) 0.0221(6) Uani 1 1 d . . .
C74 C 0.0875(2) 0.3584(3) 0.34471(18) 0.0237(6) Uani 1 1 d . . .
H74 H 0.0962 0.2816 0.3385 0.028 Uiso 1 1 calc R . .
C75 C 0.0729(2) 0.4271(3) 0.28490(17) 0.0241(7) Uani 1 1 d . . .
C76 C 0.0609(2) 0.5397(3) 0.29384(17) 0.0215(6) Uani 1 1 d . . .
H76 H 0.0523 0.585 0.2516 0.026 Uiso 1 1 calc R . .
C77 C 0.1104(2) 0.3356(3) 0.48082(19) 0.0278(7) Uani 1 1 d . . .
C78 C 0.0667(3) 0.3794(3) 0.2085(2) 0.0371(9) Uani 1 1 d . . .
C81 C 0.1691(2) 0.7600(3) 0.36311(17) 0.0208(6) Uani 1 1 d . . .
C82 C 0.2374(2) 0.7522(3) 0.42349(16) 0.0205(6) Uani 1 1 d . . .
H82 H 0.2174 0.7238 0.4682 0.025 Uiso 1 1 calc R . .
C83 C 0.3325(2) 0.7842(2) 0.42080(16) 0.0199(6) Uani 1 1 d . . .
C84 C 0.3664(2) 0.8220(3) 0.35592(17) 0.0234(6) Uani 1 1 d . . .
H84 H 0.4315 0.8446 0.3535 0.028 Uiso 1 1 calc R . .
C85 C 0.3006(2) 0.8254(3) 0.29433(16) 0.0213(6) Uani 1 1 d . . .
C86 C 0.2045(2) 0.7956(3) 0.29819(16) 0.0200(6) Uani 1 1 d . . .
H86 H 0.1618 0.7999 0.2552 0.024 Uiso 1 1 calc R . .
C87 C 0.3974(2) 0.7786(3) 0.49027(18) 0.0263(7) Uani 1 1 d . . .
C88 C 0.3344(2) 0.8593(3) 0.22155(18) 0.0296(7) Uani 1 1 d . . .
NA N 0.43148(18) 0.2050(2) 0.35482(14) 0.0200(5) Uani 1 1 d . . .
N2 N 0.4173(2) 0.1624(2) 0.47685(15) 0.0275(6) Uani 1 1 d . . .
NB N 0.59667(18) 0.3160(2) 0.26644(14) 0.0207(5) Uani 1 1 d . . .
N4 N 0.4853(2) 0.4583(2) 0.26314(15) 0.0276(6) Uani 1 1 d . . .
NC N 0.63773(18) 0.1220(2) 0.37241(14) 0.0209(5) Uani 1 1 d . . .
N6 N 0.7752(2) 0.1859(3) 0.43835(18) 0.0357(7) Uani 1 1 d . . .
SiB Si 0.53227(7) 0.22059(8) 0.50302(5) 0.0270(2) Uani 1 1 d . . .
SiC Si 0.48250(6) 0.45476(7) 0.35991(5) 0.02425(19) Uani 1 1 d . . .
SiA Si 0.73347(7) 0.32320(8) 0.43301(5) 0.0297(2) Uani 1 1 d . . .
Ru Ru 0.567471(13) 0.285929(19) 0.383667(12) 0.02022(6) Uani 1 1 d . . .
B1 B 0.0577(3) 0.7209(3) 0.37187(19) 0.0215(8) Uani 1 1 d . . .
F1 F -0.19010(17) 0.6558(2) 0.61425(13) 0.0479(6) Uani 1 1 d . . .
F2 F -0.25166(17) 0.6646(2) 0.50307(13) 0.0509(6) Uani 1 1 d . . .
F3 F -0.26274(16) 0.8016(2) 0.57489(13) 0.0420(5) Uani 1 1 d . . .
F4 F 0.16338(17) 0.9950(2) 0.58053(15) 0.0603(8) Uani 1 1 d . . .
F5 F 0.02910(18) 1.07992(18) 0.58391(13) 0.0467(6) Uani 1 1 d . . .
F6 F 0.07342(19) 0.96618(19) 0.66709(11) 0.0441(6) Uani 1 1 d . . .
F7 F -0.31106(18) 0.6753(3) 0.26071(13) 0.0535(7) Uani 1 1 d . . .
F8 F -0.23506(17) 0.6234(2) 0.16952(14) 0.0489(6) Uani 1 1 d . . .
F9 F -0.32037(16) 0.7694(2) 0.16187(14) 0.0473(6) Uani 1 1 d . . .
F10 F -0.0404(4) 1.1179(2) 0.29057(17) 0.1172(18) Uani 1 1 d . . .
F11 F -0.0095(3) 1.0784(2) 0.1848(2) 0.0866(11) Uani 1 1 d . . .
F12 F -0.1497(2) 1.1089(2) 0.2048(2) 0.0905(12) Uani 1 1 d . . .
F13 F 0.04900(17) 0.35548(18) 0.53240(11) 0.0383(5) Uani 1 1 d . . .
F14 F 0.19892(17) 0.3527(2) 0.51202(14) 0.0547(7) Uani 1 1 d . . .
F15 F 0.10380(18) 0.22721(16) 0.46671(12) 0.0420(6) Uani 1 1 d . . .
F16 F 0.10617(19) 0.28258(17) 0.20434(12) 0.0452(6) Uani 1 1 d . . .
F17 F -0.0231(2) 0.3695(4) 0.18132(18) 0.1051(16) Uani 1 1 d . . .
F18 F 0.1107(3) 0.4432(2) 0.16236(14) 0.0896(13) Uani 1 1 d . . .
F19 F 0.48579(15) 0.8165(2) 0.48294(11) 0.0414(5) Uani 1 1 d . . .
F20 F 0.40745(17) 0.6751(2) 0.51551(12) 0.0392(5) Uani 1 1 d . . .
F21 F 0.36026(16) 0.8349(2) 0.54442(11) 0.0410(5) Uani 1 1 d . . .
F22 F 0.3394(2) 0.77619(19) 0.17564(12) 0.0522(7) Uani 1 1 d . . .
F23 F 0.41986(17) 0.9097(3) 0.22804(13) 0.0657(9) Uani 1 1 d . . .
F24 F 0.27466(17) 0.93188(18) 0.18634(11) 0.0378(5) Uani 1 1 d . . .
HA H 0.637(3) 0.385(4) 0.398(2) 0.051(12) Uiso 1 1 d . . .
HB H 0.514(3) 0.351(4) 0.435(2) 0.048(12) Uiso 1 1 d . . .
 
loop_
    _atom_site_aniso_label
    _atom_site_aniso_U_11
    _atom_site_aniso_U_22
    _atom_site_aniso_U_33
    _atom_site_aniso_U_23
    _atom_site_aniso_U_13
    _atom_site_aniso_U_12
C1 0.0255(16) 0.0252(16) 0.0208(15) -0.0026(12) 0.0021(12) 0.0042(13)
C2 0.0269(17) 0.0260(17) 0.0292(17) -0.0046(14) -0.0004(13) 0.0021(14)
C3 0.0219(16) 0.0303(19) 0.043(2) -0.0059(16) 0.0029(14) -0.0010(14)
C4 0.0263(17) 0.0267(18) 0.0365(19) 0.0035(14) 0.0091(14) 0.0028(14)
C5 0.0246(16) 0.0208(16) 0.0270(16) 0.0015(13) 0.0090(13) 0.0060(13)
C6 0.040(2) 0.048(2) 0.0334(19) 0.0168(17) 0.0137(16) 0.0010(18)
C7 0.073(3) 0.055(3) 0.0253(19) -0.0130(18) 0.015(2) -0.007(2)
C8 0.040(2) 0.059(3) 0.0267(18) 0.0157(17) -0.0003(15) 0.0024(19)
C11 0.0271(16) 0.0281(17) 0.0239(16) 0.0041(13) 0.0030(13) 0.0023(14)
C12 0.0324(18) 0.0356(19) 0.0211(16) -0.0016(14) 0.0073(13) 0.0021(15)
C13 0.044(2) 0.039(2) 0.0187(15) 0.0003(14) 0.0067(14) 0.0007(17)
C14 0.0386(19) 0.0305(19) 0.0207(16) 0.0036(13) 0.0000(13) 0.0008(15)
C15 0.0236(15) 0.0209(15) 0.0222(15) -0.0009(12) -0.0023(12) -0.0029(12)
C16 0.043(2) 0.036(2) 0.0360(19) 0.0071(16) 0.0018(16) 0.0170(17)
C17 0.0295(19) 0.035(2) 0.043(2) -0.0011(16) 0.0088(15) 0.0054(16)
C18 0.037(2) 0.0243(17) 0.038(2) -0.0062(15) 0.0029(16) 0.0028(14)
C21 0.0230(15) 0.0253(16) 0.0206(15) 0.0000(12) 0.0025(12) 0.0012(13)
C22 0.0294(17) 0.0258(17) 0.0277(16) -0.0025(13) 0.0057(13) -0.0010(14)
C23 0.0391(19) 0.0254(17) 0.0234(16) 0.0024(13) 0.0060(14) 0.0105(15)
C24 0.0328(19) 0.038(2) 0.0228(16) 0.0027(14) -0.0050(14) 0.0110(15)
C25 0.0216(16) 0.0323(18) 0.0235(16) 0.0011(13) 0.0005(12) 0.0054(13)
C26 0.036(2) 0.051(3) 0.060(3) -0.014(2) -0.029(2) 0.011(2)
C27 0.047(2) 0.042(2) 0.038(2) -0.0130(17) -0.0133(17) -0.0033(19)
C28 0.030(2) 0.052(3) 0.056(3) 0.002(2) -0.0041(17) -0.0098(19)
C51 0.0236(15) 0.0224(15) 0.0146(14) 0.0020(11) -0.0024(12) 0.0023(13)
C52 0.0237(16) 0.0229(17) 0.0200(15) -0.0012(12) -0.0025(12) -0.0026(13)
C53 0.0235(16) 0.0300(18) 0.0213(16) 0.0011(13) 0.0010(12) -0.0029(13)
C54 0.0266(16) 0.0286(17) 0.0177(14) -0.0016(12) 0.0017(12) 0.0004(13)
C55 0.0252(16) 0.0237(16) 0.0191(15) -0.0007(12) -0.0020(12) 0.0026(13)
C56 0.0185(14) 0.0223(16) 0.0210(15) 0.0027(12) 0.0002(11) -0.0005(12)
C57 0.0321(19) 0.038(2) 0.0268(17) -0.0015(15) 0.0093(14) -0.0065(16)
C58 0.0255(16) 0.0276(18) 0.0220(15) -0.0023(13) 0.0018(12) 0.0021(13)
C61 0.0195(14) 0.0215(15) 0.0149(13) -0.0001(11) 0.0043(11) 0.0017(12)
C62 0.0247(15) 0.0193(15) 0.0152(14) -0.0007(11) 0.0035(11) 0.0003(12)
C63 0.0238(15) 0.0274(17) 0.0151(14) -0.0053(12) 0.0033(12) 0.0003(13)
C64 0.0237(15) 0.0280(17) 0.0163(14) 0.0027(12) 0.0025(11) 0.0089(13)
C65 0.0264(16) 0.0236(16) 0.0202(15) 0.0033(12) 0.0061(12) 0.0055(13)
C66 0.0231(15) 0.0218(15) 0.0200(15) -0.0004(12) 0.0024(12) -0.0016(12)
C67 0.0271(17) 0.0348(19) 0.0247(17) -0.0026(14) -0.0003(13) 0.0009(15)
C68 0.0321(18) 0.0259(18) 0.038(2) 0.0080(15) 0.0026(15) 0.0057(15)
C71 0.0184(14) 0.0225(16) 0.0207(16) -0.0017(11) -0.0005(13) 0.0004(12)
C72 0.0191(14) 0.0255(17) 0.0193(15) -0.0008(12) 0.0010(11) -0.0021(12)
C73 0.0183(14) 0.0184(15) 0.0297(16) 0.0048(12) 0.0030(12) -0.0009(12)
C74 0.0213(15) 0.0186(16) 0.0314(17) -0.0002(13) 0.0026(13) 0.0025(13)
C75 0.0265(16) 0.0244(16) 0.0217(16) -0.0045(13) 0.0036(12) 0.0032(13)
C76 0.0237(15) 0.0221(15) 0.0184(15) 0.0028(12) 0.0002(12) 0.0029(12)
C77 0.0311(17) 0.0214(16) 0.0312(17) 0.0039(13) 0.0051(14) 0.0011(14)
C78 0.053(2) 0.031(2) 0.0276(19) -0.0047(15) 0.0010(16) 0.0128(17)
C81 0.0244(16) 0.0176(15) 0.0203(15) -0.0012(11) 0.0004(12) 0.0023(12)
C82 0.0266(16) 0.0202(15) 0.0148(14) -0.0014(11) 0.0026(11) 0.0020(12)
C83 0.0225(15) 0.0176(15) 0.0193(14) -0.0034(11) -0.0006(11) 0.0041(12)
C84 0.0193(15) 0.0251(16) 0.0255(16) -0.0017(13) 0.0008(12) -0.0009(13)
C85 0.0258(16) 0.0210(15) 0.0177(14) -0.0030(12) 0.0046(12) -0.0010(12)
C86 0.0215(15) 0.0198(15) 0.0181(14) -0.0003(12) -0.0025(11) 0.0008(12)
C87 0.0271(17) 0.0317(18) 0.0200(15) -0.0019(13) 0.0010(12) 0.0009(14)
C88 0.0280(17) 0.0371(19) 0.0236(16) 0.0005(14) 0.0010(13) -0.0077(15)
NA 0.0198(13) 0.0195(13) 0.0211(13) -0.0029(10) 0.0029(10) 0.0006(10)
N2 0.0284(14) 0.0304(16) 0.0244(14) 0.0046(11) 0.0057(11) 0.0005(12)
NB 0.0212(13) 0.0227(13) 0.0182(12) -0.0020(10) 0.0017(10) 0.0021(10)
N4 0.0310(15) 0.0252(14) 0.0260(14) 0.0019(11) -0.0008(11) 0.0058(12)
NC 0.0191(12) 0.0220(13) 0.0218(13) 0.0019(10) 0.0031(10) 0.0032(10)
N6 0.0261(15) 0.0370(17) 0.0417(18) -0.0063(14) -0.0125(13) 0.0043(13)
SiB 0.0322(5) 0.0327(5) 0.0161(4) -0.0009(4) 0.0025(3) 0.0009(4)
SiC 0.0238(4) 0.0223(4) 0.0270(5) -0.0025(4) 0.0042(3) 0.0018(4)
SiA 0.0279(5) 0.0295(5) 0.0303(5) -0.0043(4) -0.0064(4) -0.0006(4)
Ru 0.02179(11) 0.02214(11) 0.01670(10) -0.00181(11) 0.00116(8) 0.00048(12)
B1 0.0247(19) 0.0203(16) 0.020(2) -0.0012(13) 0.0027(15) -0.0031(15)
F1 0.0485(14) 0.0506(15) 0.0468(13) 0.0154(11) 0.0177(11) -0.0088(11)
F2 0.0381(13) 0.0692(17) 0.0472(14) -0.0205(12) 0.0155(10) -0.0289(12)
F3 0.0272(11) 0.0525(14) 0.0482(13) -0.0049(11) 0.0158(10) -0.0020(10)
F4 0.0350(12) 0.0800(19) 0.0682(17) -0.0497(15) 0.0185(11) -0.0232(13)
F5 0.0598(15) 0.0234(11) 0.0524(14) 0.0007(10) -0.0256(11) -0.0025(10)
F6 0.0736(16) 0.0373(12) 0.0200(10) -0.0053(9) -0.0066(10) -0.0046(11)
F7 0.0420(14) 0.0813(19) 0.0372(13) 0.0017(12) 0.0036(10) -0.0308(13)
F8 0.0415(13) 0.0458(14) 0.0571(15) -0.0257(11) -0.0110(11) 0.0002(11)
F9 0.0350(12) 0.0486(14) 0.0543(14) 0.0015(11) -0.0218(10) -0.0003(11)
F10 0.263(6) 0.0208(13) 0.0590(19) 0.0044(13) -0.047(3) -0.018(2)
F11 0.108(3) 0.0422(16) 0.118(3) 0.0193(17) 0.061(2) -0.0038(17)
F12 0.071(2) 0.0400(16) 0.154(3) 0.0409(19) -0.034(2) 0.0043(14)
F13 0.0555(14) 0.0343(12) 0.0270(11) 0.0099(9) 0.0144(10) 0.0094(10)
F14 0.0392(13) 0.0710(18) 0.0511(14) 0.0344(13) -0.0155(11) -0.0085(12)
F15 0.0623(15) 0.0234(11) 0.0428(13) 0.0120(9) 0.0195(11) 0.0110(10)
F16 0.0730(17) 0.0275(11) 0.0358(12) -0.0096(9) 0.0080(11) 0.0150(11)
F17 0.069(2) 0.174(4) 0.0661(19) -0.079(2) -0.0360(16) 0.055(2)
F18 0.208(4) 0.0336(14) 0.0330(13) -0.0019(11) 0.0462(19) 0.0043(19)
F19 0.0281(11) 0.0648(15) 0.0302(11) 0.0015(10) -0.0055(8) -0.0108(10)
F20 0.0446(13) 0.0420(13) 0.0294(11) 0.0093(10) -0.0071(9) 0.0084(11)
F21 0.0453(13) 0.0540(14) 0.0231(10) -0.0135(10) -0.0012(9) 0.0080(11)
F22 0.090(2) 0.0401(14) 0.0299(12) 0.0033(10) 0.0281(13) 0.0194(13)
F23 0.0388(13) 0.123(3) 0.0346(12) 0.0241(14) -0.0006(10) -0.0341(15)
F24 0.0538(13) 0.0346(11) 0.0253(10) 0.0086(9) 0.0045(9) 0.0023(10)
 
 
#----------------------------------------------------------------------------#
#                   MOLECULAR GEOMETRY                                       #
#----------------------------------------------------------------------------#
 
_geom_special_details
;
 All s.u.'s (except the s.u. in the dihedral angle between two l.s. planes)
 are estimated using the full covariance matrix.  The cell s.u.'s are taken
 into account individually in the estimation of s.u.'s in distances, angles
 and torsion angles; correlations between s.u.'s in cell parameters are only
 used when they are defined by crystal symmetry.  An approximate (isotropic)
 treatment of cell s.u.'s is used for estimating s.u.'s involving l.s. planes.
;
loop_
    _geom_bond_atom_site_label_1
    _geom_bond_atom_site_label_2
    _geom_bond_distance
    _geom_bond_site_symmetry_2
    _geom_bond_publ_flag
C1 NA 1.366(4) . ?
C1 C2 1.368(5) . ?
C1 H1 0.95 . ?
C2 C3 1.391(5) . ?
C2 H2 0.95 . ?
C3 C4 1.374(5) . ?
C3 H3 0.95 . ?
C4 C5 1.408(5) . ?
C4 H4 0.95 . ?
C5 N2 1.349(4) . ?
C5 NA 1.364(4) . ?
C6 N2 1.462(4) . ?
C6 H6A 0.98 . ?
C6 H6B 0.98 . ?
C6 H6C 0.98 . ?
C7 SiB 1.884(4) . ?
C7 H7A 0.98 . ?
C7 H7B 0.98 . ?
C7 H7C 0.98 . ?
C8 SiB 1.874(4) . ?
C8 H8A 0.98 . ?
C8 H8B 0.98 . ?
C8 H8C 0.98 . ?
C11 NB 1.349(4) . ?
C11 C12 1.369(5) . ?
C11 H11 0.95 . ?
C12 C13 1.390(5) . ?
C12 H12 0.95 . ?
C13 C14 1.358(5) . ?
C13 H13 0.95 . ?
C14 C15 1.413(5) . ?
C14 H14 0.95 . ?
C15 N4 1.359(4) . ?
C15 NB 1.359(4) . ?
C16 N4 1.465(4) . ?
C16 H16A 0.98 . ?
C16 H16B 0.98 . ?
C16 H16C 0.98 . ?
C17 SiC 1.867(4) . ?
C17 H17A 0.98 . ?
C17 H17B 0.98 . ?
C17 H17C 0.98 . ?
C18 SiC 1.870(4) . ?
C18 H18A 0.98 . ?
C18 H18B 0.98 . ?
C18 H18C 0.98 . ?
C21 NC 1.357(4) . ?
C21 C22 1.372(5) . ?
C21 H21 0.95 . ?
C22 C23 1.388(5) . ?
C22 H22 0.95 . ?
C23 C24 1.364(5) . ?
C23 H23 0.95 . ?
C24 C25 1.417(5) . ?
C24 H24 0.95 . ?
C25 N6 1.340(5) . ?
C25 NC 1.372(4) . ?
C26 N6 1.470(4) . ?
C26 H26A 0.98 . ?
C26 H26B 0.98 . ?
C26 H26C 0.98 . ?
C27 SiA 1.862(4) . ?
C27 H27A 0.98 . ?
C27 H27B 0.98 . ?
C27 H27C 0.98 . ?
C28 SiA 1.868(4) . ?
C28 H28A 0.98 . ?
C28 H28B 0.98 . ?
C28 H28C 0.98 . ?
C51 C56 1.401(4) . ?
C51 C52 1.405(4) . ?
C51 B1 1.635(5) . ?
C52 C53 1.391(5) . ?
C52 H52 0.95 . ?
C53 C54 1.394(5) . ?
C53 C57 1.497(5) . ?
C54 C55 1.382(5) . ?
C54 H54 0.95 . ?
C55 C56 1.390(4) . ?
C55 C58 1.501(4) . ?
C56 H56 0.95 . ?
C57 F2 1.328(4) . ?
C57 F1 1.338(4) . ?
C57 F3 1.343(4) . ?
C58 F5 1.327(4) . ?
C58 F6 1.332(4) . ?
C58 F4 1.333(4) . ?
C61 C62 1.398(4) . ?
C61 C66 1.410(4) . ?
C61 B1 1.642(4) . ?
C62 C63 1.388(4) . ?
C62 H62 0.95 . ?
C63 C64 1.389(5) . ?
C63 C67 1.506(5) . ?
C64 C65 1.385(5) . ?
C64 H64 0.95 . ?
C65 C66 1.393(4) . ?
C65 C68 1.495(5) . ?
C66 H66 0.95 . ?
C67 F9 1.331(4) . ?
C67 F8 1.332(4) . ?
C67 F7 1.337(4) . ?
C68 F10 1.255(5) . ?
C68 F12 1.303(4) . ?
C68 F11 1.345(5) . ?
C71 C72 1.396(4) . ?
C71 C76 1.402(4) . ?
C71 B1 1.624(4) . ?
C72 C73 1.396(4) . ?
C72 H72 0.95 . ?
C73 C74 1.379(5) . ?
C73 C77 1.497(4) . ?
C74 C75 1.381(5) . ?
C74 H74 0.95 . ?
C75 C76 1.392(5) . ?
C75 C78 1.511(5) . ?
C76 H76 0.95 . ?
C77 F14 1.333(4) . ?
C77 F13 1.343(4) . ?
C77 F15 1.347(4) . ?
C78 F16 1.305(4) . ?
C78 F17 1.313(5) . ?
C78 F18 1.331(5) . ?
C81 C86 1.390(4) . ?
C81 C82 1.405(4) . ?
C81 B1 1.640(5) . ?
C82 C83 1.383(4) . ?
C82 H82 0.95 . ?
C83 C84 1.390(4) . ?
C83 C87 1.504(4) . ?
C84 C85 1.397(4) . ?
C84 H84 0.95 . ?
C85 C86 1.392(4) . ?
C85 C88 1.504(4) . ?
C86 H86 0.95 . ?
C87 F19 1.329(4) . ?
C87 F21 1.341(4) . ?
C87 F20 1.346(4) . ?
C88 F22 1.320(4) . ?
C88 F23 1.335(4) . ?
C88 F24 1.344(4) . ?
NA Ru 2.162(3) . ?
N2 SiB 1.780(3) . ?
NB Ru 2.244(3) . ?
N4 SiC 1.776(3) . ?
NC Ru 2.238(3) . ?
N6 SiA 1.770(3) . ?
SiB Ru 2.4105(9) . ?
SiC Ru 2.3941(9) . ?
SiC HB 1.89(4) . ?
SiA Ru 2.4560(9) . ?
SiA HA 1.62(4) . ?
Ru HA 1.55(5) . ?
Ru HB 1.47(4) . ?
 
loop_
    _geom_angle_atom_site_label_1
    _geom_angle_atom_site_label_2
    _geom_angle_atom_site_label_3
    _geom_angle
    _geom_angle_site_symmetry_1
    _geom_angle_site_symmetry_3
    _geom_angle_publ_flag
NA C1 C2 124.4(3) . . ?
NA C1 H1 117.8 . . ?
C2 C1 H1 117.8 . . ?
C1 C2 C3 117.8(3) . . ?
C1 C2 H2 121.1 . . ?
C3 C2 H2 121.1 . . ?
C4 C3 C2 119.3(3) . . ?
C4 C3 H3 120.3 . . ?
C2 C3 H3 120.3 . . ?
C3 C4 C5 120.8(3) . . ?
C3 C4 H4 119.6 . . ?
C5 C4 H4 119.6 . . ?
N2 C5 NA 117.3(3) . . ?
N2 C5 C4 123.0(3) . . ?
NA C5 C4 119.8(3) . . ?
N2 C6 H6A 109.5 . . ?
N2 C6 H6B 109.5 . . ?
H6A C6 H6B 109.5 . . ?
N2 C6 H6C 109.5 . . ?
H6A C6 H6C 109.5 . . ?
H6B C6 H6C 109.5 . . ?
SiB C7 H7A 109.5 . . ?
SiB C7 H7B 109.5 . . ?
H7A C7 H7B 109.5 . . ?
SiB C7 H7C 109.5 . . ?
H7A C7 H7C 109.5 . . ?
H7B C7 H7C 109.5 . . ?
SiB C8 H8A 109.5 . . ?
SiB C8 H8B 109.5 . . ?
H8A C8 H8B 109.5 . . ?
SiB C8 H8C 109.5 . . ?
H8A C8 H8C 109.5 . . ?
H8B C8 H8C 109.5 . . ?
NB C11 C12 124.5(3) . . ?
NB C11 H11 117.7 . . ?
C12 C11 H11 117.7 . . ?
C11 C12 C13 117.3(3) . . ?
C11 C12 H12 121.3 . . ?
C13 C12 H12 121.3 . . ?
C14 C13 C12 120.1(3) . . ?
C14 C13 H13 120 . . ?
C12 C13 H13 120 . . ?
C13 C14 C15 120.0(3) . . ?
C13 C14 H14 120 . . ?
C15 C14 H14 120 . . ?
N4 C15 NB 117.4(3) . . ?
N4 C15 C14 122.5(3) . . ?
NB C15 C14 120.1(3) . . ?
N4 C16 H16A 109.5 . . ?
N4 C16 H16B 109.5 . . ?
H16A C16 H16B 109.5 . . ?
N4 C16 H16C 109.5 . . ?
H16A C16 H16C 109.5 . . ?
H16B C16 H16C 109.5 . . ?
SiC C17 H17A 109.5 . . ?
SiC C17 H17B 109.5 . . ?
H17A C17 H17B 109.5 . . ?
SiC C17 H17C 109.5 . . ?
H17A C17 H17C 109.5 . . ?
H17B C17 H17C 109.5 . . ?
SiC C18 H18A 109.5 . . ?
SiC C18 H18B 109.5 . . ?
H18A C18 H18B 109.5 . . ?
SiC C18 H18C 109.5 . . ?
H18A C18 H18C 109.5 . . ?
H18B C18 H18C 109.5 . . ?
NC C21 C22 123.6(3) . . ?
NC C21 H21 118.2 . . ?
C22 C21 H21 118.2 . . ?
C21 C22 C23 118.4(3) . . ?
C21 C22 H22 120.8 . . ?
C23 C22 H22 120.8 . . ?
C24 C23 C22 119.8(3) . . ?
C24 C23 H23 120.1 . . ?
C22 C23 H23 120.1 . . ?
C23 C24 C25 120.1(3) . . ?
C23 C24 H24 119.9 . . ?
C25 C24 H24 119.9 . . ?
N6 C25 NC 117.3(3) . . ?
N6 C25 C24 122.8(3) . . ?
NC C25 C24 119.9(3) . . ?
N6 C26 H26A 109.5 . . ?
N6 C26 H26B 109.5 . . ?
H26A C26 H26B 109.5 . . ?
N6 C26 H26C 109.5 . . ?
H26A C26 H26C 109.5 . . ?
H26B C26 H26C 109.5 . . ?
SiA C27 H27A 109.5 . . ?
SiA C27 H27B 109.5 . . ?
H27A C27 H27B 109.5 . . ?
SiA C27 H27C 109.5 . . ?
H27A C27 H27C 109.5 . . ?
H27B C27 H27C 109.5 . . ?
SiA C28 H28A 109.5 . . ?
SiA C28 H28B 109.5 . . ?
H28A C28 H28B 109.5 . . ?
SiA C28 H28C 109.5 . . ?
H28A C28 H28C 109.5 . . ?
H28B C28 H28C 109.5 . . ?
C56 C51 C52 115.3(3) . . ?
C56 C51 B1 123.5(3) . . ?
C52 C51 B1 120.6(3) . . ?
C53 C52 C51 122.4(3) . . ?
C53 C52 H52 118.8 . . ?
C51 C52 H52 118.8 . . ?
C52 C53 C54 120.6(3) . . ?
C52 C53 C57 120.0(3) . . ?
C54 C53 C57 119.4(3) . . ?
C55 C54 C53 118.2(3) . . ?
C55 C54 H54 120.9 . . ?
C53 C54 H54 120.9 . . ?
C54 C55 C56 120.7(3) . . ?
C54 C55 C58 119.3(3) . . ?
C56 C55 C58 120.1(3) . . ?
C55 C56 C51 122.7(3) . . ?
C55 C56 H56 118.6 . . ?
C51 C56 H56 118.6 . . ?
F2 C57 F1 107.5(3) . . ?
F2 C57 F3 106.3(3) . . ?
F1 C57 F3 106.0(3) . . ?
F2 C57 C53 113.3(3) . . ?
F1 C57 C53 111.7(3) . . ?
F3 C57 C53 111.6(3) . . ?
F5 C58 F6 105.4(3) . . ?
F5 C58 F4 107.1(3) . . ?
F6 C58 F4 105.5(3) . . ?
F5 C58 C55 113.0(3) . . ?
F6 C58 C55 112.3(3) . . ?
F4 C58 C55 113.0(3) . . ?
C62 C61 C66 115.7(3) . . ?
C62 C61 B1 123.7(3) . . ?
C66 C61 B1 120.0(3) . . ?
C63 C62 C61 122.2(3) . . ?
C63 C62 H62 118.9 . . ?
C61 C62 H62 118.9 . . ?
C62 C63 C64 121.4(3) . . ?
C62 C63 C67 118.3(3) . . ?
C64 C63 C67 120.3(3) . . ?
C65 C64 C63 117.6(3) . . ?
C65 C64 H64 121.2 . . ?
C63 C64 H64 121.2 . . ?
C64 C65 C66 121.1(3) . . ?
C64 C65 C68 120.8(3) . . ?
C66 C65 C68 118.0(3) . . ?
C65 C66 C61 122.0(3) . . ?
C65 C66 H66 119 . . ?
C61 C66 H66 119 . . ?
F9 C67 F8 106.7(3) . . ?
F9 C67 F7 106.5(3) . . ?
F8 C67 F7 106.5(3) . . ?
F9 C67 C63 113.3(3) . . ?
F8 C67 C63 112.0(3) . . ?
F7 C67 C63 111.4(3) . . ?
F10 C68 F12 110.6(4) . . ?
F10 C68 F11 105.7(4) . . ?
F12 C68 F11 101.1(3) . . ?
F10 C68 C65 114.8(3) . . ?
F12 C68 C65 112.9(3) . . ?
F11 C68 C65 110.7(3) . . ?
C72 C71 C76 115.9(3) . . ?
C72 C71 B1 123.2(3) . . ?
C76 C71 B1 120.5(3) . . ?
C73 C72 C71 122.0(3) . . ?
C73 C72 H72 119 . . ?
C71 C72 H72 119 . . ?
C74 C73 C72 121.0(3) . . ?
C74 C73 C77 120.9(3) . . ?
C72 C73 C77 118.0(3) . . ?
C73 C74 C75 118.2(3) . . ?
C73 C74 H74 120.9 . . ?
C75 C74 H74 120.9 . . ?
C74 C75 C76 121.0(3) . . ?
C74 C75 C78 119.7(3) . . ?
C76 C75 C78 119.2(3) . . ?
C75 C76 C71 122.0(3) . . ?
C75 C76 H76 119 . . ?
C71 C76 H76 119 . . ?
F14 C77 F13 106.7(3) . . ?
F14 C77 F15 106.4(3) . . ?
F13 C77 F15 105.9(3) . . ?
F14 C77 C73 112.5(3) . . ?
F13 C77 C73 112.4(3) . . ?
F15 C77 C73 112.5(3) . . ?
F16 C78 F17 106.6(4) . . ?
F16 C78 F18 105.9(3) . . ?
F17 C78 F18 106.5(4) . . ?
F16 C78 C75 114.0(3) . . ?
F17 C78 C75 111.8(3) . . ?
F18 C78 C75 111.5(3) . . ?
C86 C81 C82 115.5(3) . . ?
C86 C81 B1 125.0(3) . . ?
C82 C81 B1 119.4(3) . . ?
C83 C82 C81 123.0(3) . . ?
C83 C82 H82 118.5 . . ?
C81 C82 H82 118.5 . . ?
C82 C83 C84 120.8(3) . . ?
C82 C83 C87 118.1(3) . . ?
C84 C83 C87 121.1(3) . . ?
C83 C84 C85 117.1(3) . . ?
C83 C84 H84 121.5 . . ?
C85 C84 H84 121.5 . . ?
C86 C85 C84 121.6(3) . . ?
C86 C85 C88 118.9(3) . . ?
C84 C85 C88 119.6(3) . . ?
C81 C86 C85 121.9(3) . . ?
C81 C86 H86 119 . . ?
C85 C86 H86 119 . . ?
F19 C87 F21 108.0(3) . . ?
F19 C87 F20 106.7(3) . . ?
F21 C87 F20 105.1(3) . . ?
F19 C87 C83 113.5(3) . . ?
F21 C87 C83 111.2(3) . . ?
F20 C87 C83 111.8(3) . . ?
F22 C88 F23 108.6(3) . . ?
F22 C88 F24 105.0(3) . . ?
F23 C88 F24 104.7(3) . . ?
F22 C88 C85 112.9(3) . . ?
F23 C88 C85 112.6(3) . . ?
F24 C88 C85 112.5(3) . . ?
C5 NA C1 117.9(3) . . ?
C5 NA Ru 121.3(2) . . ?
C1 NA Ru 120.5(2) . . ?
C5 N2 C6 118.2(3) . . ?
C5 N2 SiB 123.3(2) . . ?
C6 N2 SiB 118.5(2) . . ?
C11 NB C15 117.9(3) . . ?
C11 NB Ru 121.7(2) . . ?
C15 NB Ru 119.8(2) . . ?
C15 N4 C16 118.1(3) . . ?
C15 N4 SiC 120.9(2) . . ?
C16 N4 SiC 118.3(2) . . ?
C21 NC C25 118.1(3) . . ?
C21 NC Ru 120.9(2) . . ?
C25 NC Ru 120.7(2) . . ?
C25 N6 C26 117.9(3) . . ?
C25 N6 SiA 123.7(2) . . ?
C26 N6 SiA 118.4(3) . . ?
N2 SiB C8 105.72(17) . . ?
N2 SiB C7 105.00(18) . . ?
C8 SiB C7 106.0(2) . . ?
N2 SiB Ru 97.34(9) . . ?
C8 SiB Ru 119.02(13) . . ?
C7 SiB Ru 121.31(15) . . ?
N4 SiC C17 107.57(16) . . ?
N4 SiC C18 106.11(15) . . ?
C17 SiC C18 109.63(17) . . ?
N4 SiC Ru 98.86(9) . . ?
C17 SiC Ru 117.72(13) . . ?
C18 SiC Ru 115.43(12) . . ?
N4 SiC HB 135.9(13) . . ?
C17 SiC HB 92.9(13) . . ?
C18 SiC HB 102.8(13) . . ?
Ru SiC HB 37.8(13) . . ?
N6 SiA C27 107.61(18) . . ?
N6 SiA C28 107.12(19) . . ?
C27 SiA C28 107.1(2) . . ?
N6 SiA Ru 98.10(10) . . ?
C27 SiA Ru 118.18(14) . . ?
C28 SiA Ru 117.41(13) . . ?
N6 SiA HA 135.5(16) . . ?
C27 SiA HA 103.4(16) . . ?
C28 SiA HA 92.9(16) . . ?
Ru SiA HA 38.2(16) . . ?
NA Ru NC 87.19(9) . . ?
NA Ru NB 93.41(9) . . ?
NC Ru NB 86.85(9) . . ?
NA Ru SiC 86.36(7) . . ?
NC Ru SiC 164.06(7) . . ?
NB Ru SiC 79.01(7) . . ?
NA Ru SiB 80.60(7) . . ?
NC Ru SiB 84.81(7) . . ?
NB Ru SiB 169.94(7) . . ?
SiC Ru SiB 108.44(3) . . ?
NA Ru SiA 162.58(7) . . ?
NC Ru SiA 78.11(7) . . ?
NB Ru SiA 95.04(7) . . ?
SiC Ru SiA 110.19(3) . . ?
SiB Ru SiA 88.73(3) . . ?
NA Ru HA 156.4(17) . . ?
NC Ru HA 115.8(17) . . ?
NB Ru HA 83.1(17) . . ?
SiC Ru HA 70.0(16) . . ?
SiB Ru HA 105.6(17) . . ?
SiA Ru HA 40.4(16) . . ?
NA Ru HB 85.9(17) . . ?
NC Ru HB 141.8(17) . . ?
NB Ru HB 131.0(17) . . ?
SiC Ru HB 52.1(17) . . ?
SiB Ru HB 57.0(17) . . ?
SiA Ru HB 99.8(17) . . ?
HA Ru HB 79(2) . . ?
C71 B1 C51 114.4(3) . . ?
C71 B1 C81 104.2(3) . . ?
C51 B1 C81 111.8(2) . . ?
C71 B1 C61 111.5(2) . . ?
C51 B1 C61 102.3(3) . . ?
C81 B1 C61 113.0(3) . . ?
 
# The following lines are used to test the character set of files sent by
# network email or other means. They are not part of the CIF data set
# abcdefghijklmnopqrstuvwxyzABCDEFGHIJKLMNOPQRSTUVWXYZ0123456789
# !@#$%^&*()_+{}:"~<>?|\-=[];'`,./
 
# END
data_ru8
 
_audit_creation_method            SHELXL-97
_publ_contact_author_name         'Sylviane Sabo-Etienne'
_publ_contact_author_address 
;
 Laboratoire de Chimie de Coordination
 205 Route de Narbonne
 31077 Toulouse Cedex 04
;
_publ_contact_author_email        'sabo@lcc-toulouse.fr'
loop_
 _publ_author_name 

 'Katharina A. Smart'
 'Mary Grellier'
 'Laure Vendier'
 'Sax A. Mason'
 'Silvia C. Capelli'
 'Alberto Albinati'
 'Sylviane Sabo-Etienne'
  
_publ_requested_journal           'Angew. Chem. Int. Ed.'
_publ_section_title
;
 Step by Step Introduction of Silazane Moieties at Ruthenium; 
 Tuning the Multicentre Nature of "Ru-H-Si" Interactions.
;

_chemical_name_common 
;            
{RuH[(eta2-H-SiMe2)N(Me)kappa-N-(C5H4N)][kappa-Si,N-(SiMe2)N(Me)(C5H4N)]2}+
 {[3,5-(CF3)2C6H3]4B}-  
;
_chemical_formula_sum
 'C56 H53 B F24 N6 Ru Si3'
_chemical_formula_weight          1463.00
 
loop_
 _atom_type_symbol
 _atom_type_description
 _atom_type_scat_dispersion_real
 _atom_type_scat_dispersion_imag
 _atom_type_scat_source
 'C'  'C'   6.6460   0.0000
 'Neutron Scattering Lengths, Neutron Data Booklet, 1.1-1 ILL, 2003.'
 'H'  'H'  -3.7390   0.0000
 'Neutron Scattering Lengths, Neutron Data Booklet, 1.1-1 ILL, 2003.'
 'B'  'B'   5.3000   0.0000
 'Neutron Scattering Lengths, Neutron Data Booklet, 1.1-1 ILL, 2003.'
 'N'  'N'   9.3600   0.0000
 'Neutron Scattering Lengths, Neutron Data Booklet, 1.1-1 ILL, 2003.'
 'F'  'F'   5.6540   0.0000
 'Neutron Scattering Lengths, Neutron Data Booklet, 1.1-1 ILL, 2003.'
 'Si'  'Si'   4.1500   0.0000
 'Neutron Scattering Lengths, Neutron Data Booklet, 1.1-1 ILL, 2003.'
 'Ru'  'Ru'   7.0200   0.0000
 'Neutron Scattering Lengths, Neutron Data Booklet, 1.1-1 ILL, 2003.'
 
_symmetry_cell_setting            Monoclinic
_symmetry_space_group_name_H-M    Pn
 
loop_
 _symmetry_equiv_pos_as_xyz
 'x, y, z'
 'x+1/2, -y, z+1/2'
 
_cell_length_a                    13.9659(3)
_cell_length_b                    11.9966(4)
_cell_length_c                    18.2189(5)
_cell_angle_alpha                 90.00
_cell_angle_beta                  94.0112(17)
_cell_angle_gamma                 90.00
_cell_volume                      3044.98(15)
_cell_formula_units_Z             2
_cell_measurement_temperature     20(1)
_cell_measurement_reflns_used     4187
_cell_measurement_theta_min       3.35
_cell_measurement_theta_max       59.91
 
_exptl_crystal_description        'plate'
_exptl_crystal_colour             'pale yellow'
_exptl_crystal_size_max           1.24
_exptl_crystal_size_mid           1.24
_exptl_crystal_size_min           0.52
_exptl_crystal_density_meas       ?
_exptl_crystal_density_diffrn     1.596
_exptl_crystal_density_method     'not measured'
_exptl_crystal_F_000              781
_exptl_absorpt_coefficient_mu     0.183
_exptl_absorpt_correction_type    analytical
_exptl_absorpt_correction_T_min   0.8042
_exptl_absorpt_correction_T_max   0.9129
_exptl_absorpt_process_details    'program D19abscan'
 
_exptl_special_details
;
  Crystal mounted on a Displex cryorefrigerator on D19 with a horizontally 
 curved position-sensitive gas detector. Multi-wire gas counter, 640 horizontal 
 cathodes, 256 vertical anodes, subtending 120 deg (horiz), 30 deg (vert). 
 Reflections ( in the range 4.82< theta <61.29 deg) were measured to 
 pre-set monitor counts, using omega step-scans, and typical counting time 13.5 
 or 20.5 sec per step. Typical omega scans: 78 deg in 0.07 deg steps.
;
 
_diffrn_ambient_temperature       20(1)
_diffrn_radiation_wavelength      1.1708
_diffrn_radiation_type            neutron
_diffrn_radiation_source          'ILL High Flux Reactor'
_diffrn_radiation_monochromator   'Cu (311)'

_diffrn_measurement_device_type   
 'D19 position-sensitive detector diffractometer'
_diffrn_measurement_method        'omega step-scans'

_diffrn_standards_number          2
 
_diffrn_standards_interval_time   420
 
_diffrn_reflns_number             27927
_diffrn_reflns_av_R_equivalents   0.1253
_diffrn_reflns_av_sigmaI/netI     0.1198
_diffrn_reflns_limit_h_min        -20
_diffrn_reflns_limit_h_max        20
_diffrn_reflns_limit_k_min        -17
_diffrn_reflns_limit_k_max        17
_diffrn_reflns_limit_l_min        -26
_diffrn_reflns_limit_l_max        15
_diffrn_reflns_theta_min          4.82
_diffrn_reflns_theta_max          61.29
_reflns_number_total              9494
_reflns_number_gt                 7647
_reflns_threshold_expression      >2sigma(I)
 
_computing_data_collection        'ILL HKLGEN, MAD'
_computing_cell_refinement        'ILL RAFD9'
_computing_data_reduction         'ILL Retreat'
_computing_structure_refinement   'SHELXL-97 (Acta Cryst.,2008,A64,112)'
_computing_molecular_graphics
;     
 ORTEP for Windows v1.074 (L.J. Farrugia 1997)
 Mercury CSD 2.4.5 (Build RC3), CCDC, Cambridge (2011)
;
_computing_publication_material  
 'WinGX v1.64.05(L.J. Farrugia, J. Appl. Cryst.,1999,32, 837)'
 
_refine_special_details
;
 Refinement of F^2^ against ALL reflections.  The weighted R-factor wR and
 goodness of fit S are based on F^2^, conventional R-factors R are based
 on F, with F set to zero for negative F^2^. The threshold expression of
 F^2^ > 2sigma(F^2^) is used only for calculating R-factors(gt) etc. and is
 not relevant to the choice of reflections for refinement.  R-factors based
 on F^2^ are statistically about twice as large as those based on F, and R-
 factors based on ALL data will be even larger.
The data completeness of about 88% is typical for neutron diffraction 
measurements on D19 with cylindrical cryorefrigerator heat shields; 
in fact, because of these heat-shields reflections going through the ends 
of the cryorefrigerator cans have to be rejected thus limiting reciprocal 
space coverage. 
;
 
_refine_ls_structure_factor_coef  Fsqd
_refine_ls_matrix_type            full
_refine_ls_weighting_scheme       calc
_refine_ls_weighting_details
 'calc w=1/[\s^2^(Fo^2^)+(0.0460P)^2^+20.0133P] where P=(Fo^2^+2Fc^2^)/3'
_atom_sites_solution_primary      direct
_atom_sites_solution_secondary    difmap
_atom_sites_solution_hydrogens    difmap
_refine_ls_hydrogen_treatment     refall
_refine_ls_extinction_method      none
 
_refine_ls_number_reflns          9494
_refine_ls_number_parameters      1297
_refine_ls_number_restraints      2
_refine_ls_R_factor_all           0.0882
_refine_ls_R_factor_gt            0.0617
_refine_ls_wR_factor_ref          0.1310
_refine_ls_wR_factor_gt           0.1197
_refine_ls_goodness_of_fit_ref    1.063
_refine_ls_restrained_S_all       1.063
_refine_ls_shift/su_max           0.004
_refine_ls_shift/su_mean          0.000
 
loop_
 _atom_site_label
 _atom_site_type_symbol
 _atom_site_fract_x
 _atom_site_fract_y
 _atom_site_fract_z
 _atom_site_U_iso_or_equiv
 _atom_site_adp_type
 _atom_site_occupancy
 _atom_site_symmetry_multiplicity
 _atom_site_calc_flag
 _atom_site_refinement_flags
 _atom_site_disorder_assembly
 _atom_site_disorder_group
C1 C 0.3952(2) 0.2075(3) 0.28494(19) 0.0104(6) Uani 1 1 d . . .
H1 H 0.4399(5) 0.2428(7) 0.2455(5) 0.0255(16) Uani 1 1 d . . .
C2 C 0.3058(2) 0.1662(3) 0.2638(2) 0.0108(6) Uani 1 1 d . . .
H2 H 0.2779(6) 0.1697(8) 0.2076(5) 0.0283(17) Uani 1 1 d . . .
C3 C 0.2522(2) 0.1188(3) 0.3180(2) 0.0128(6) Uani 1 1 d . . .
H3 H 0.1815(6) 0.0847(8) 0.3042(5) 0.0322(19) Uani 1 1 d . . .
C4 C 0.2891(2) 0.1161(3) 0.3897(2) 0.0113(6) Uani 1 1 d . . .
H4 H 0.2491(6) 0.0802(7) 0.4332(5) 0.0273(16) Uani 1 1 d . . .
C5 C 0.3816(2) 0.1613(3) 0.4086(2) 0.0098(6) Uani 1 1 d . . .
C6 C 0.3653(2) 0.1159(3) 0.5365(2) 0.0150(7) Uani 1 1 d . . .
H6A H 0.3000(6) 0.1627(9) 0.5443(6) 0.036(2) Uani 1 1 d . . .
H6B H 0.4087(7) 0.1189(10) 0.5885(6) 0.039(2) Uani 1 1 d . . .
H6C H 0.3458(8) 0.0286(8) 0.5258(6) 0.040(2) Uani 1 1 d . . .
C7 C 0.5176(3) 0.3174(3) 0.5823(2) 0.0195(8) Uani 1 1 d . . .
H7A H 0.4615(9) 0.3788(11) 0.5685(7) 0.051(3) Uani 1 1 d . . .
H7B H 0.5812(9) 0.3621(12) 0.5978(8) 0.055(3) Uani 1 1 d . . .
H7C H 0.4989(8) 0.2722(9) 0.6318(6) 0.042(2) Uani 1 1 d . . .
C8 C 0.6096(3) 0.1012(3) 0.5452(2) 0.0160(7) Uani 1 1 d . . .
H8A H 0.5799(7) 0.0769(9) 0.5958(6) 0.038(2) Uani 1 1 d . . .
H8B H 0.6838(7) 0.1241(11) 0.5593(6) 0.043(3) Uani 1 1 d . . .
H8C H 0.6095(7) 0.0288(7) 0.5086(6) 0.035(2) Uani 1 1 d . . .
C11 C 0.6654(2) 0.2621(3) 0.23229(19) 0.0101(6) Uani 1 1 d . . .
H11 H 0.6990(6) 0.1926(6) 0.2632(5) 0.0252(16) Uani 1 1 d . . .
C12 C 0.6932(2) 0.2865(3) 0.1628(2) 0.0120(6) Uani 1 1 d . . .
H12 H 0.7494(6) 0.2389(8) 0.1403(5) 0.0286(18) Uani 1 1 d . . .
C13 C 0.6475(2) 0.3757(3) 0.1252(2) 0.0124(6) Uani 1 1 d . . .
H13 H 0.6684(6) 0.3982(8) 0.0716(5) 0.0297(18) Uani 1 1 d . . .
C14 C 0.5772(2) 0.4344(3) 0.1577(2) 0.0127(6) Uani 1 1 d . . .
H14 H 0.5409(6) 0.5055(7) 0.1292(5) 0.0295(18) Uani 1 1 d . . .
C15 C 0.5533(2) 0.4059(3) 0.22908(18) 0.0081(5) Uani 1 1 d . . .
C16 C 0.4353(3) 0.5557(3) 0.2252(2) 0.0163(7) Uani 1 1 d . . .
H16A H 0.4836(7) 0.6214(8) 0.2122(6) 0.038(2) Uani 1 1 d . . .
H16B H 0.3831(7) 0.5903(8) 0.2600(6) 0.037(2) Uani 1 1 d . . .
H16C H 0.3958(7) 0.5256(9) 0.1753(6) 0.037(2) Uani 1 1 d . . .
C17 C 0.3563(2) 0.4623(3) 0.3853(2) 0.0162(7) Uani 1 1 d . . .
H17A H 0.3220(6) 0.5408(8) 0.3705(6) 0.036(2) Uani 1 1 d . . .
H17B H 0.3509(7) 0.4519(10) 0.4437(6) 0.040(2) Uani 1 1 d . . .
H17C H 0.3141(6) 0.3962(8) 0.3574(6) 0.037(2) Uani 1 1 d . . .
C18 C 0.5475(2) 0.5873(3) 0.3982(2) 0.0144(7) Uani 1 1 d . . .
H18A H 0.6193(6) 0.5907(8) 0.3796(5) 0.0293(18) Uani 1 1 d . . .
H18B H 0.5521(7) 0.5905(7) 0.4576(5) 0.0296(17) Uani 1 1 d . . .
H18C H 0.5096(7) 0.6611(8) 0.3776(7) 0.038(2) Uani 1 1 d . . .
C21 C 0.5890(2) 0.0353(3) 0.33679(19) 0.0098(6) Uani 1 1 d . . .
H21 H 0.5200(5) 0.0570(7) 0.3097(5) 0.0271(17) Uani 1 1 d . . .
C22 C 0.6223(2) -0.0734(3) 0.3363(2) 0.0133(6) Uani 1 1 d . . .
H22 H 0.5802(6) -0.1378(7) 0.3069(5) 0.0282(17) Uani 1 1 d . . .
C23 C 0.7107(2) -0.0977(3) 0.3731(2) 0.0114(6) Uani 1 1 d . . .
H23 H 0.7387(6) -0.1813(7) 0.3764(5) 0.0291(17) Uani 1 1 d . . .
C24 C 0.7640(2) -0.0127(3) 0.4062(2) 0.0124(6) Uani 1 1 d . . .
H24 H 0.8331(6) -0.0296(7) 0.4326(5) 0.0285(17) Uani 1 1 d . . .
C25 C 0.7273(2) 0.0976(3) 0.4036(2) 0.0100(6) Uani 1 1 d . . .
C26 C 0.8717(3) 0.1614(3) 0.4715(2) 0.0184(7) Uani 1 1 d . . .
H26A H 0.8647(8) 0.1061(10) 0.5186(6) 0.044(2) Uani 1 1 d . . .
H26B H 0.9024(7) 0.2405(8) 0.4944(7) 0.041(3) Uani 1 1 d . . .
H26C H 0.9220(6) 0.1282(9) 0.4337(6) 0.038(2) Uani 1 1 d . . .
C27 C 0.7573(3) 0.3834(3) 0.5253(2) 0.0172(7) Uani 1 1 d . . .
H27A H 0.7389(8) 0.3272(10) 0.5687(6) 0.044(3) Uani 1 1 d . . .
H27B H 0.7152(8) 0.4602(9) 0.5307(7) 0.041(2) Uani 1 1 d . . .
H27C H 0.8324(7) 0.4065(10) 0.5368(6) 0.043(2) Uani 1 1 d . . .
C28 C 0.8148(2) 0.4037(3) 0.3703(2) 0.0172(7) Uani 1 1 d . . .
H28A H 0.8897(6) 0.3968(10) 0.3886(7) 0.043(3) Uani 1 1 d . . .
H28B H 0.7960(7) 0.4913(8) 0.3717(7) 0.044(3) Uani 1 1 d . . .
H28C H 0.8086(8) 0.3760(10) 0.3140(6) 0.042(2) Uani 1 1 d . . .
NA N 0.43385(15) 0.20608(19) 0.35540(13) 0.0085(4) Uani 1 1 d . . .
NB N 0.59682(15) 0.31852(19) 0.26590(14) 0.0098(4) Uani 1 1 d . . .
NC N 0.63887(15) 0.11924(19) 0.37117(14) 0.0099(4) Uani 1 1 d . . .
N2 N 0.42076(16) 0.1627(2) 0.47881(14) 0.0115(4) Uani 1 1 d . . .
N4 N 0.48590(16) 0.4636(2) 0.26473(14) 0.0111(4) Uani 1 1 d . . .
N6 N 0.77805(16) 0.1844(2) 0.43443(15) 0.0128(4) Uani 1 1 d . . .
SiA Si 0.7360(3) 0.3233(4) 0.4312(3) 0.0086(9) Uani 1 1 d . . .
SiB Si 0.5363(3) 0.2194(4) 0.5038(3) 0.0097(9) Uani 1 1 d . . .
SiC Si 0.4846(3) 0.4589(4) 0.3616(3) 0.0091(9) Uani 1 1 d . . .
Ru1 Ru 0.56973(19) 0.2870(2) 0.38377(17) 0.0071(5) Uani 1 1 d . . .
HA H 0.6361(6) 0.3953(6) 0.3940(6) 0.0275(17) Uani 1 1 d . . .
HB H 0.5210(6) 0.3558(6) 0.4455(5) 0.0241(15) Uani 1 1 d . . .
C51 C 0.0173(2) 0.7643(3) 0.44908(19) 0.0083(5) Uani 1 1 d . . .
C52 C -0.0686(2) 0.7224(3) 0.47399(19) 0.0090(6) Uani 1 1 d . . .
H52 H -0.1063(5) 0.6554(7) 0.4436(5) 0.0232(15) Uani 1 1 d . . .
C53 C -0.1108(2) 0.7674(3) 0.53442(19) 0.0095(6) Uani 1 1 d . . .
C54 C -0.0657(2) 0.8542(3) 0.5756(2) 0.0089(6) Uani 1 1 d . . .
H54 H -0.0975(5) 0.8881(7) 0.6237(5) 0.0251(16) Uani 1 1 d . . .
C55 C 0.0208(2) 0.8954(3) 0.55257(19) 0.0094(6) Uani 1 1 d . . .
C56 C 0.0598(2) 0.8527(3) 0.48977(19) 0.0091(6) Uani 1 1 d . . .
H56 H 0.1252(5) 0.8890(7) 0.4732(5) 0.0239(15) Uani 1 1 d . . .
C57 C -0.2034(2) 0.7222(3) 0.5576(2) 0.0115(6) Uani 1 1 d . . .
C58 C 0.0706(2) 0.9873(3) 0.59643(19) 0.0087(6) Uani 1 1 d . . .
C61 C -0.0210(2) 0.7763(3) 0.30995(19) 0.0079(5) Uani 1 1 d . . .
C62 C -0.1019(2) 0.7201(3) 0.2798(2) 0.0103(6) Uani 1 1 d . . .
H62 H -0.1114(6) 0.6318(7) 0.2901(5) 0.0244(15) Uani 1 1 d . . .
C63 C -0.1736(2) 0.7738(3) 0.23579(19) 0.0083(5) Uani 1 1 d . . .
C64 C -0.1670(2) 0.8866(3) 0.2199(2) 0.0101(6) Uani 1 1 d . . .
H64 H -0.2225(5) 0.9289(6) 0.1869(5) 0.0250(16) Uani 1 1 d . . .
C65 C -0.0864(2) 0.9445(3) 0.24898(19) 0.0089(6) Uani 1 1 d . . .
C66 C -0.0155(2) 0.8900(3) 0.29305(19) 0.0087(6) Uani 1 1 d . . .
H66 H 0.0459(5) 0.9388(7) 0.3157(5) 0.0260(16) Uani 1 1 d . . .
C67 C -0.2591(2) 0.7071(3) 0.2067(2) 0.0106(6) Uani 1 1 d . . .
C68 C -0.0731(2) 1.0651(3) 0.2313(2) 0.0113(6) Uani 1 1 d . . .
C71 C 0.0600(2) 0.5846(3) 0.36355(19) 0.0085(5) Uani 1 1 d . . .
C72 C 0.0738(2) 0.5131(3) 0.42352(19) 0.0084(6) Uani 1 1 d . . .
H72 H 0.0725(6) 0.5455(7) 0.4789(5) 0.0260(16) Uani 1 1 d . . .
C73 C 0.0887(2) 0.3993(3) 0.41475(19) 0.0091(6) Uani 1 1 d . . .
C74 C 0.0876(2) 0.3509(3) 0.3451(2) 0.0107(6) Uani 1 1 d . . .
H74 H 0.0982(6) 0.2622(7) 0.3382(5) 0.0272(16) Uani 1 1 d . . .
C75 C 0.0722(2) 0.4206(3) 0.28418(19) 0.0104(6) Uani 1 1 d . . .
C76 C 0.0602(2) 0.5349(3) 0.29300(19) 0.0104(6) Uani 1 1 d . . .
H76 H 0.0511(7) 0.5875(7) 0.2447(5) 0.0293(18) Uani 1 1 d . . .
C77 C 0.1100(2) 0.3285(3) 0.4824(2) 0.0103(6) Uani 1 1 d . . .
C78 C 0.0668(2) 0.3724(3) 0.2081(2) 0.0131(6) Uani 1 1 d . . .
C81 C 0.1673(2) 0.7598(3) 0.36281(19) 0.0087(6) Uani 1 1 d . . .
C82 C 0.2343(2) 0.7509(3) 0.42361(19) 0.0093(6) Uani 1 1 d . . .
H82 H 0.2108(5) 0.7180(7) 0.4757(4) 0.0248(15) Uani 1 1 d . . .
C83 C 0.3293(2) 0.7849(3) 0.4210(2) 0.0099(6) Uani 1 1 d . . .
C84 C 0.3628(2) 0.8250(3) 0.3558(2) 0.0104(6) Uani 1 1 d . . .
H84 H 0.4365(5) 0.8515(8) 0.3541(5) 0.0259(16) Uani 1 1 d . . .
C85 C 0.2991(2) 0.8286(3) 0.29382(19) 0.0094(6) Uani 1 1 d . . .
C86 C 0.2029(2) 0.7975(3) 0.2975(2) 0.0110(6) Uani 1 1 d . . .
H86 H 0.1543(5) 0.8023(7) 0.2475(5) 0.0250(16) Uani 1 1 d . . .
C87 C 0.3928(2) 0.7784(3) 0.49140(19) 0.0092(6) Uani 1 1 d . . .
C88 C 0.3328(2) 0.8656(3) 0.2213(2) 0.0105(6) Uani 1 1 d . . .
B1 B 0.0557(2) 0.7208(3) 0.3702(2) 0.0068(7) Uani 1 1 d . . .
F1 F -0.1903(3) 0.6538(4) 0.6162(3) 0.0153(8) Uani 1 1 d . . .
F2 F -0.2523(3) 0.6653(4) 0.5041(3) 0.0165(8) Uani 1 1 d . . .
F3 F -0.2614(3) 0.8045(4) 0.5787(3) 0.0164(8) Uani 1 1 d . . .
F4 F 0.1610(3) 1.0038(4) 0.5767(3) 0.0176(9) Uani 1 1 d . . .
F5 F 0.0247(3) 1.0849(3) 0.5881(3) 0.0134(7) Uani 1 1 d . . .
F6 F 0.0780(3) 0.9650(4) 0.6687(2) 0.0137(7) Uani 1 1 d . . .
F7 F -0.3090(3) 0.6682(4) 0.2619(3) 0.0184(9) Uani 1 1 d . . .
F8 F -0.2334(3) 0.6182(4) 0.1682(3) 0.0163(8) Uani 1 1 d . . .
F9 F -0.3209(3) 0.7657(4) 0.1627(3) 0.0154(8) Uani 1 1 d . . .
F10 F -0.0341(3) 1.1217(4) 0.2893(3) 0.0184(8) Uani 1 1 d . . .
F11 F -0.0142(3) 1.0784(4) 0.1770(3) 0.0182(9) Uani 1 1 d . . .
F12 F -0.1553(3) 1.1151(4) 0.2096(3) 0.0202(9) Uani 1 1 d . . .
F13 F 0.0485(3) 0.3497(3) 0.5344(3) 0.0145(8) Uani 1 1 d . . .
F14 F 0.1981(3) 0.3485(4) 0.5124(3) 0.0167(8) Uani 1 1 d . . .
F15 F 0.1045(3) 0.2186(3) 0.4679(2) 0.0141(8) Uani 1 1 d . . .
F16 F 0.1093(3) 0.2741(4) 0.2049(2) 0.0153(8) Uani 1 1 d . . .
F17 F -0.0250(3) 0.3575(5) 0.1831(3) 0.0285(12) Uani 1 1 d . . .
F18 F 0.1066(4) 0.4384(4) 0.1602(3) 0.0243(10) Uani 1 1 d . . .
F19 F 0.4795(3) 0.8212(4) 0.4842(3) 0.0151(8) Uani 1 1 d . . .
F20 F 0.4047(3) 0.6731(3) 0.5151(3) 0.0139(7) Uani 1 1 d . . .
F21 F 0.3537(3) 0.8348(4) 0.5459(2) 0.0147(8) Uani 1 1 d . . .
F22 F 0.3411(3) 0.7785(4) 0.1746(3) 0.0157(8) Uani 1 1 d . . .
F23 F 0.4181(3) 0.9151(4) 0.2274(3) 0.0148(8) Uani 1 1 d . . .
F24 F 0.2715(3) 0.9375(3) 0.1861(2) 0.0130(7) Uani 1 1 d . . .
 
loop_
 _atom_site_aniso_label
 _atom_site_aniso_U_11
 _atom_site_aniso_U_22
 _atom_site_aniso_U_33
 _atom_site_aniso_U_23
 _atom_site_aniso_U_13
 _atom_site_aniso_U_12
C1 0.0038(11) 0.0174(14) 0.0096(16) -0.0009(12) -0.0014(10) -0.0015(10)
H1 0.019(3) 0.035(4) 0.022(4) 0.006(3) 0.003(3) -0.005(3)
C2 0.0064(11) 0.0132(13) 0.0131(18) -0.0038(12) 0.0017(11) -0.0015(10)
H2 0.019(3) 0.033(4) 0.032(5) 0.000(3) 0.000(3) -0.002(3)
C3 0.0050(11) 0.0184(14) 0.0151(17) -0.0009(13) 0.0014(11) -0.0004(11)
H3 0.017(3) 0.044(5) 0.036(5) -0.002(4) 0.004(3) -0.009(3)
C4 0.0052(11) 0.0169(14) 0.0118(17) -0.0002(12) 0.0010(11) -0.0006(10)
H4 0.023(3) 0.035(4) 0.025(4) 0.007(3) 0.006(3) -0.005(3)
C5 0.0039(11) 0.0134(13) 0.0124(16) 0.0011(11) 0.0029(10) 0.0000(10)
C6 0.0111(13) 0.0200(15) 0.0148(19) 0.0029(13) 0.0065(13) -0.0016(12)
H6A 0.027(4) 0.046(5) 0.038(5) 0.007(4) 0.018(4) 0.007(4)
H6B 0.028(4) 0.055(6) 0.032(5) 0.024(5) -0.001(4) -0.011(4)
H6C 0.051(6) 0.027(4) 0.042(6) 0.001(4) 0.013(5) -0.012(4)
C7 0.0205(16) 0.0228(17) 0.0161(19) -0.0044(15) 0.0074(14) -0.0003(14)
H7A 0.054(6) 0.057(7) 0.042(6) -0.021(5) 0.005(5) 0.028(5)
H7B 0.046(6) 0.069(8) 0.053(7) -0.020(6) 0.019(5) -0.020(6)
H7C 0.060(6) 0.040(5) 0.029(5) -0.005(4) 0.024(5) 0.001(4)
C8 0.0134(14) 0.0183(15) 0.0162(19) 0.0057(14) 0.0017(13) 0.0029(12)
H8A 0.043(5) 0.043(5) 0.029(5) 0.010(4) 0.011(4) 0.004(4)
H8B 0.022(4) 0.059(6) 0.045(6) 0.020(5) -0.008(4) -0.004(4)
H8C 0.047(5) 0.022(3) 0.039(5) -0.007(4) 0.010(4) 0.011(3)
C11 0.0083(12) 0.0161(14) 0.0062(15) 0.0015(11) 0.0037(11) 0.0018(10)
H11 0.029(3) 0.021(3) 0.027(4) 0.007(3) 0.012(3) 0.017(3)
C12 0.0107(13) 0.0159(14) 0.0099(16) 0.0026(12) 0.0050(12) 0.0033(11)
H12 0.022(3) 0.038(4) 0.027(4) 0.008(3) 0.011(3) 0.010(3)
C13 0.0113(13) 0.0176(14) 0.0088(16) 0.0006(12) 0.0042(11) 0.0022(11)
H13 0.029(4) 0.043(4) 0.019(4) 0.003(3) 0.014(3) 0.010(3)
C14 0.0117(13) 0.0159(14) 0.0109(17) 0.0026(12) 0.0033(11) 0.0040(11)
H14 0.033(4) 0.031(4) 0.025(4) 0.013(3) 0.005(3) 0.015(3)
C15 0.0075(11) 0.0101(12) 0.0066(15) -0.0003(11) -0.0003(10) 0.0003(10)
C16 0.0134(14) 0.0183(15) 0.0175(19) 0.0027(14) 0.0039(13) 0.0063(12)
H16A 0.039(5) 0.031(4) 0.043(6) 0.012(4) 0.005(4) 0.003(4)
H16B 0.037(5) 0.034(4) 0.041(6) 0.008(4) 0.017(4) 0.018(4)
H16C 0.029(4) 0.040(5) 0.040(6) -0.003(4) -0.011(4) 0.013(4)
C17 0.0084(13) 0.0192(15) 0.022(2) 0.0012(14) 0.0057(13) 0.0007(12)
H17A 0.022(3) 0.038(5) 0.047(6) 0.003(4) 0.003(4) 0.013(3)
H17B 0.027(4) 0.063(7) 0.031(5) 0.002(5) 0.012(4) 0.008(4)
H17C 0.021(3) 0.037(5) 0.053(6) -0.012(4) 0.002(4) -0.012(3)
C18 0.0110(13) 0.0151(14) 0.0174(19) -0.0020(13) 0.0030(12) -0.0010(11)
H18A 0.019(3) 0.036(4) 0.034(5) -0.004(4) 0.009(3) -0.006(3)
H18B 0.037(4) 0.027(4) 0.026(5) -0.004(3) 0.004(3) -0.006(3)
H18C 0.037(5) 0.028(4) 0.049(6) -0.005(4) 0.000(4) 0.007(4)
C21 0.0067(12) 0.0112(13) 0.0114(17) -0.0011(11) -0.0002(11) 0.0012(10)
H21 0.017(3) 0.027(4) 0.037(5) -0.012(3) -0.003(3) 0.001(3)
C22 0.0089(12) 0.0136(14) 0.0176(18) -0.0029(13) 0.0029(12) 0.0005(11)
H22 0.023(3) 0.021(3) 0.040(5) 0.000(3) -0.003(3) -0.006(3)
C23 0.0089(12) 0.0099(12) 0.0157(18) 0.0022(11) 0.0027(12) 0.0011(10)
H23 0.033(4) 0.019(3) 0.035(5) 0.000(3) 0.004(3) 0.009(3)
C24 0.0060(12) 0.0166(14) 0.0143(18) 0.0000(12) -0.0016(11) 0.0003(10)
H24 0.026(3) 0.018(3) 0.040(5) -0.002(3) -0.011(3) 0.006(3)
C25 0.0063(11) 0.0104(12) 0.0132(16) -0.0004(11) 0.0000(11) 0.0016(9)
C26 0.0111(14) 0.0204(16) 0.023(2) -0.0026(15) -0.0073(13) 0.0009(12)
H26A 0.038(5) 0.052(6) 0.039(6) 0.019(5) -0.014(4) 0.008(5)
H26B 0.026(4) 0.031(4) 0.063(7) -0.021(5) -0.025(4) -0.001(3)
H26C 0.016(3) 0.048(5) 0.050(6) -0.010(5) -0.005(3) 0.009(3)
C27 0.0159(14) 0.0197(16) 0.0155(19) -0.0031(14) -0.0039(13) -0.0017(13)
H27A 0.055(6) 0.048(6) 0.031(5) 0.020(5) 0.008(5) -0.003(5)
H27B 0.038(5) 0.037(5) 0.049(6) -0.016(5) 0.002(4) 0.002(4)
H27C 0.035(5) 0.052(6) 0.041(6) -0.011(5) 0.004(4) -0.010(4)
C28 0.0083(13) 0.0207(16) 0.023(2) 0.0017(14) 0.0027(13) -0.0041(12)
H28A 0.015(3) 0.056(6) 0.059(7) 0.011(5) -0.002(4) -0.005(4)
H28B 0.034(4) 0.026(4) 0.075(8) 0.009(5) 0.021(5) 0.002(3)
H28C 0.040(5) 0.058(6) 0.028(5) -0.001(5) 0.007(4) -0.015(5)
NA 0.0066(8) 0.0106(8) 0.0084(11) 0.0007(8) 0.0011(7) -0.0004(7)
NB 0.0062(8) 0.0123(9) 0.0110(12) 0.0013(8) 0.0016(8) 0.0006(7)
NC 0.0075(8) 0.0113(9) 0.0108(12) -0.0010(8) -0.0005(8) -0.0007(7)
N2 0.0075(8) 0.0166(10) 0.0109(12) -0.0006(8) 0.0031(8) -0.0009(8)
N4 0.0096(9) 0.0118(9) 0.0118(12) 0.0002(8) 0.0007(8) 0.0027(7)
N6 0.0085(8) 0.0134(9) 0.0163(13) -0.0004(9) -0.0011(8) 0.0003(7)
SiA 0.0029(17) 0.0093(19) 0.013(3) -0.0012(17) -0.0030(16) -0.0003(14)
SiB 0.0091(19) 0.011(2) 0.009(2) 0.0009(18) 0.0005(17) -0.0008(16)
SiC 0.0025(17) 0.015(2) 0.010(2) 0.0040(18) 0.0009(16) 0.0027(15)
Ru1 0.0049(10) 0.0094(11) 0.0068(14) -0.0002(10) -0.0003(9) 0.0002(9)
HA 0.019(3) 0.018(3) 0.045(5) 0.002(3) -0.002(3) -0.004(3)
HB 0.027(3) 0.022(3) 0.024(4) -0.005(3) 0.008(3) 0.005(3)
C51 0.0046(11) 0.0112(12) 0.0091(15) -0.0002(11) 0.0013(10) -0.0006(9)
C52 0.0044(11) 0.0140(13) 0.0086(15) -0.0024(11) 0.0002(10) -0.0018(10)
H52 0.014(3) 0.026(3) 0.031(4) -0.008(3) 0.005(3) -0.008(2)
C53 0.0053(11) 0.0121(13) 0.0114(16) 0.0016(11) 0.0022(10) -0.0020(10)
C54 0.0047(11) 0.0114(12) 0.0108(16) -0.0010(11) 0.0018(10) -0.0016(9)
H54 0.019(3) 0.035(4) 0.022(4) -0.013(3) 0.008(3) -0.006(3)
C55 0.0064(11) 0.0114(12) 0.0104(16) -0.0005(11) 0.0006(11) -0.0007(10)
C56 0.0071(12) 0.0120(13) 0.0086(16) -0.0014(11) 0.0030(11) -0.0014(10)
H56 0.015(3) 0.029(4) 0.028(4) -0.001(3) 0.005(3) -0.005(3)
C57 0.0084(12) 0.0164(14) 0.0101(16) -0.0009(12) 0.0029(11) -0.0007(11)
C58 0.0079(12) 0.0107(12) 0.0074(15) -0.0020(11) 0.0005(11) -0.0010(10)
C61 0.0058(11) 0.0088(11) 0.0092(15) -0.0007(11) -0.0001(10) 0.0011(9)
C62 0.0066(11) 0.0120(13) 0.0123(16) 0.0012(12) 0.0016(11) 0.0003(10)
H62 0.024(3) 0.022(3) 0.027(4) 0.008(3) 0.002(3) -0.003(3)
C63 0.0057(11) 0.0108(12) 0.0085(15) 0.0005(11) 0.0004(10) 0.0000(9)
C64 0.0055(11) 0.0120(13) 0.0128(16) -0.0007(12) 0.0004(11) -0.0012(10)
H64 0.013(3) 0.020(3) 0.041(5) 0.006(3) -0.004(3) 0.004(2)
C65 0.0035(10) 0.0113(12) 0.0118(16) 0.0021(11) 0.0004(10) 0.0001(9)
C66 0.0048(11) 0.0114(12) 0.0098(16) 0.0026(11) -0.0015(10) 0.0003(9)
H66 0.017(3) 0.021(3) 0.040(5) 0.012(3) 0.000(3) -0.003(3)
C67 0.0057(11) 0.0132(13) 0.0128(16) -0.0011(12) 0.0008(11) -0.0021(10)
C68 0.0073(12) 0.0131(13) 0.0132(17) 0.0029(12) -0.0004(11) 0.0026(10)
C71 0.0073(11) 0.0099(12) 0.0084(15) -0.0020(11) 0.0008(10) 0.0010(9)
C72 0.0067(11) 0.0117(13) 0.0066(15) -0.0003(11) -0.0015(10) -0.0002(10)
H72 0.030(4) 0.033(4) 0.015(4) 0.002(3) 0.003(3) 0.004(3)
C73 0.0072(11) 0.0116(13) 0.0084(15) 0.0002(11) 0.0005(10) -0.0009(10)
C74 0.0081(12) 0.0122(13) 0.0117(17) -0.0022(11) 0.0008(11) 0.0000(10)
H74 0.032(4) 0.019(3) 0.030(4) 0.000(3) 0.004(3) 0.002(3)
C75 0.0094(12) 0.0129(13) 0.0091(16) -0.0003(11) 0.0025(11) -0.0003(10)
C76 0.0086(12) 0.0157(14) 0.0067(16) -0.0010(11) 0.0005(11) 0.0018(10)
H76 0.042(4) 0.025(3) 0.022(4) 0.012(3) 0.013(3) 0.007(3)
C77 0.0071(12) 0.0121(13) 0.0119(16) 0.0042(12) 0.0014(11) 0.0017(10)
C78 0.0135(14) 0.0151(14) 0.0107(17) -0.0012(12) 0.0003(12) 0.0038(11)
C81 0.0064(11) 0.0104(12) 0.0093(15) 0.0029(11) 0.0011(10) -0.0007(10)
C82 0.0073(12) 0.0125(12) 0.0082(15) 0.0012(11) 0.0015(11) 0.0000(10)
H82 0.022(3) 0.035(4) 0.018(4) 0.007(3) 0.005(3) 0.001(3)
C83 0.0062(11) 0.0119(12) 0.0117(16) 0.0023(12) 0.0010(11) -0.0009(10)
C84 0.0069(12) 0.0127(13) 0.0120(16) 0.0004(11) 0.0027(11) -0.0013(10)
H84 0.016(3) 0.043(4) 0.019(4) 0.006(3) 0.002(3) -0.010(3)
C85 0.0067(11) 0.0118(12) 0.0100(16) 0.0010(11) 0.0017(11) -0.0011(10)
C86 0.0050(11) 0.0154(13) 0.0128(16) -0.0012(12) 0.0022(11) -0.0019(10)
H86 0.014(3) 0.036(4) 0.025(4) 0.006(3) -0.001(3) -0.003(3)
C87 0.0048(11) 0.0118(12) 0.0109(16) -0.0005(11) 0.0001(11) -0.0017(10)
C88 0.0088(12) 0.0119(13) 0.0113(16) 0.0011(12) 0.0031(11) -0.0012(10)
B1 0.0027(13) 0.0116(15) 0.0061(18) 0.0000(13) 0.0010(12) -0.0013(11)
F1 0.0111(16) 0.0163(17) 0.019(2) 0.0066(15) 0.0032(15) 0.0025(13)
F2 0.0081(15) 0.0249(19) 0.017(2) -0.0065(17) 0.0037(14) -0.0055(14)
F3 0.0093(15) 0.0197(18) 0.021(2) -0.0035(16) 0.0073(15) 0.0000(13)
F4 0.0081(15) 0.0239(19) 0.021(2) -0.0117(17) 0.0039(15) -0.0077(14)
F5 0.0126(15) 0.0097(14) 0.018(2) 0.0011(14) -0.0005(14) -0.0002(13)
F6 0.0153(16) 0.0167(17) 0.008(2) -0.0004(14) -0.0034(14) -0.0010(14)
F7 0.0083(15) 0.026(2) 0.021(2) 0.0045(18) 0.0022(15) -0.0045(15)
F8 0.0113(16) 0.0145(16) 0.023(2) -0.0059(16) 0.0014(15) 0.0001(13)
F9 0.0075(14) 0.0200(19) 0.018(2) -0.0015(16) -0.0060(14) -0.0019(13)
F10 0.026(2) 0.0150(17) 0.014(2) -0.0002(16) -0.0008(17) 0.0017(16)
F11 0.0197(19) 0.0163(18) 0.020(2) 0.0026(16) 0.0097(17) -0.0005(15)
F12 0.0118(16) 0.0161(18) 0.033(3) 0.0059(18) 0.0047(17) 0.0047(14)
F13 0.0167(17) 0.0138(16) 0.014(2) 0.0027(14) 0.0070(15) 0.0001(14)
F14 0.0107(16) 0.0230(19) 0.016(2) 0.0065(16) -0.0026(15) -0.0025(14)
F15 0.0118(15) 0.0123(16) 0.019(2) 0.0017(15) 0.0057(15) 0.0028(12)
F16 0.0178(17) 0.0142(16) 0.014(2) -0.0080(15) 0.0021(15) 0.0044(14)
F17 0.0139(18) 0.048(3) 0.022(3) -0.020(2) -0.0103(17) 0.010(2)
F18 0.050(3) 0.0156(18) 0.008(2) 0.0006(16) 0.009(2) 0.0028(19)
F19 0.0057(14) 0.025(2) 0.014(2) -0.0004(16) 0.0017(13) -0.0023(13)
F20 0.0132(16) 0.0135(16) 0.015(2) 0.0007(15) -0.0006(14) 0.0024(13)
F21 0.0133(16) 0.0230(19) 0.008(2) -0.0035(15) -0.0003(14) 0.0003(14)
F22 0.0176(17) 0.0154(16) 0.014(2) 0.0012(15) 0.0041(15) 0.0021(14)
F23 0.0078(15) 0.0209(18) 0.016(2) 0.0014(16) 0.0012(14) -0.0056(13)
F24 0.0130(16) 0.0145(16) 0.011(2) 0.0019(14) -0.0005(14) -0.0023(13)
 
_geom_special_details
;
 All esds (except the esd in the dihedral angle between two l.s. planes)
 are estimated using the full covariance matrix.  The cell esds are taken
 into account individually in the estimation of esds in distances, angles
 and torsion angles; correlations between esds in cell parameters are only
 used when they are defined by crystal symmetry.  An approximate (isotropic)
 treatment of cell esds is used for estimating esds involving l.s. planes.
;
 
loop_
 _geom_bond_atom_site_label_1
 _geom_bond_atom_site_label_2
 _geom_bond_distance
 _geom_bond_site_symmetry_2
 _geom_bond_publ_flag
C1 NA 1.358(4) . ?
C1 C2 1.373(4) . ?
C1 H1 1.072(8) . ?
C2 C3 1.400(4) . ?
C2 H2 1.071(11) . ?
C3 C4 1.370(5) . ?
C3 H3 1.082(9) . ?
C4 C5 1.422(4) . ?
C4 H4 1.090(8) . ?
C5 N2 1.356(5) . ?
C5 NA 1.363(3) . ?
C6 N2 1.461(4) . ?
C6 H6A 1.088(9) . ?
C6 H6B 1.088(12) . ?
C6 H6C 1.096(10) . ?
C7 SiB 1.885(6) . ?
C7 H7A 1.091(12) . ?
C7 H7B 1.058(13) . ?
C7 H7C 1.100(11) . ?
C8 SiB 1.876(6) . ?
C8 H8A 1.078(9) . ?
C8 H8B 1.086(10) . ?
C8 H8C 1.095(10) . ?
C11 NB 1.354(3) . ?
C11 C12 1.381(4) . ?
C11 H11 1.094(8) . ?
C12 C13 1.401(5) . ?
C12 H12 1.075(8) . ?
C13 C14 1.375(4) . ?
C13 H13 1.073(8) . ?
C14 C15 1.408(5) . ?
C14 H14 1.103(9) . ?
C15 NB 1.364(4) . ?
C15 N4 1.368(3) . ?
C16 N4 1.472(5) . ?
C16 H16A 1.075(10) . ?
C16 H16B 1.083(8) . ?
C16 H16C 1.092(12) . ?
C17 SiC 1.874(5) . ?
C17 H17A 1.082(10) . ?
C17 H17B 1.079(11) . ?
C17 H17C 1.092(10) . ?
C18 SiC 1.873(7) . ?
C18 H18A 1.081(7) . ?
C18 H18B 1.082(10) . ?
C18 H18C 1.085(11) . ?
C21 NC 1.353(4) . ?
C21 C22 1.384(5) . ?
C21 H21 1.084(9) . ?
C22 C23 1.394(5) . ?
C22 H22 1.089(9) . ?
C23 C24 1.377(5) . ?
C23 H23 1.077(8) . ?
C24 C25 1.419(5) . ?
C24 H24 1.067(9) . ?
C25 NC 1.356(4) . ?
C25 N6 1.359(4) . ?
C26 N6 1.455(5) . ?
C26 H26A 1.095(12) . ?
C26 H26B 1.111(10) . ?
C26 H26C 1.093(10) . ?
C27 SiA 1.865(7) . ?
C27 H27A 1.084(10) . ?
C27 H27B 1.100(11) . ?
C27 H27C 1.090(11) . ?
C28 SiA 1.883(6) . ?
C28 H28A 1.079(10) . ?
C28 H28B 1.084(10) . ?
C28 H28C 1.076(12) . ?
NA Ru1 2.162(4) . ?
NA N2 2.328(3) . ?
NB Ru1 2.239(4) . ?
NB N4 2.329(3) . ?
NC Ru1 2.250(4) . ?
NC N6 2.325(4) . ?
N2 SiB 1.780(6) . ?
N2 Ru1 3.171(3) . ?
N4 SiC 1.768(6) . ?
N4 Ru1 3.195(4) . ?
N6 SiA 1.767(5) . ?
N6 Ru1 3.233(4) . ?
SiA Ru1 2.459(6) . ?
SiA HA 1.737(10) . ?
SiB Ru1 2.408(6) . ?
SiB HB 1.954(10) . ?
SiC Ru1 2.400(6) . ?
SiC HB 2.003(10) . ?
Ru1 HA 1.600(8) . ?
Ru1 HB 1.587(7) . ?
C51 C56 1.402(5) . ?
C51 C52 1.405(4) . ?
C51 B1 1.652(5) . ?
C52 C53 1.393(4) . ?
C52 H52 1.091(8) . ?
C53 C54 1.406(5) . ?
C53 C57 1.491(4) . ?
C54 C55 1.397(4) . ?
C54 H54 1.088(7) . ?
C55 C56 1.398(4) . ?
C55 C58 1.503(5) . ?
C56 H56 1.074(7) . ?
C57 F2 1.339(6) . ?
C57 F3 1.350(5) . ?
C57 F1 1.348(6) . ?
C58 F5 1.339(5) . ?
C58 F6 1.340(6) . ?
C58 F4 1.351(4) . ?
C61 C62 1.394(5) . ?
C61 C66 1.402(4) . ?
C61 B1 1.622(5) . ?
C62 C63 1.396(5) . ?
C62 H62 1.086(8) . ?
C63 C64 1.388(4) . ?
C63 C67 1.503(5) . ?
C64 C65 1.395(5) . ?
C64 H64 1.074(8) . ?
C65 C66 1.393(5) . ?
C65 C68 1.497(5) . ?
C66 H66 1.095(9) . ?
C67 F9 1.335(6) . ?
C67 F8 1.339(5) . ?
C67 F7 1.347(5) . ?
C68 F12 1.331(5) . ?
C68 F10 1.340(6) . ?
C68 F11 1.339(5) . ?
C71 C72 1.391(5) . ?
C71 C76 1.417(5) . ?
C71 B1 1.641(5) . ?
C72 C73 1.392(4) . ?
C72 H72 1.082(9) . ?
C73 C74 1.395(5) . ?
C73 C77 1.510(5) . ?
C74 C75 1.394(5) . ?
C74 H74 1.082(8) . ?
C75 C76 1.392(5) . ?
C75 C78 1.498(5) . ?
C76 H76 1.084(9) . ?
C77 F14 1.332(5) . ?
C77 F13 1.347(5) . ?
C77 F15 1.346(5) . ?
C78 F16 1.324(5) . ?
C78 F18 1.330(6) . ?
C78 F17 1.342(6) . ?
C81 C86 1.397(4) . ?
C81 C82 1.403(5) . ?
C81 B1 1.642(4) . ?
C82 C83 1.392(4) . ?
C82 H82 1.098(8) . ?
C83 C84 1.393(4) . ?
C83 C87 1.509(5) . ?
C84 C85 1.388(5) . ?
C84 H84 1.080(7) . ?
C85 C86 1.400(4) . ?
C85 C88 1.501(4) . ?
C86 H86 1.098(9) . ?
C87 F19 1.330(4) . ?
C87 F20 1.342(5) . ?
C87 F21 1.348(5) . ?
C88 F23 1.328(5) . ?
C88 F24 1.345(6) . ?
C88 F22 1.357(5) . ?
 
loop_
 _geom_angle_atom_site_label_1
 _geom_angle_atom_site_label_2
 _geom_angle_atom_site_label_3
 _geom_angle
 _geom_angle_site_symmetry_1
 _geom_angle_site_symmetry_3
 _geom_angle_publ_flag
NA C1 C2 123.6(3) . . ?
NA C1 H1 115.3(5) . . ?
C2 C1 H1 121.1(6) . . ?
C1 C2 C3 118.1(4) . . ?
C1 C2 H2 121.1(5) . . ?
C3 C2 H2 120.9(5) . . ?
C4 C3 C2 119.8(3) . . ?
C4 C3 H3 119.2(6) . . ?
C2 C3 H3 121.0(6) . . ?
C3 C4 C5 119.8(3) . . ?
C3 C4 H4 121.6(6) . . ?
C5 C4 H4 118.5(6) . . ?
N2 C5 NA 117.7(3) . . ?
N2 C5 C4 122.2(3) . . ?
NA C5 C4 120.0(3) . . ?
N2 C6 H6A 112.8(6) . . ?
N2 C6 H6B 108.8(5) . . ?
H6A C6 H6B 106.8(9) . . ?
N2 C6 H6C 112.2(6) . . ?
H6A C6 H6C 108.3(9) . . ?
H6B C6 H6C 107.6(9) . . ?
SiB C7 H7A 112.4(7) . . ?
SiB C7 H7B 111.1(7) . . ?
H7A C7 H7B 107.1(12) . . ?
SiB C7 H7C 111.6(6) . . ?
H7A C7 H7C 108.3(9) . . ?
H7B C7 H7C 106.0(11) . . ?
SiB C8 H8A 108.5(6) . . ?
SiB C8 H8B 112.9(7) . . ?
H8A C8 H8B 106.4(9) . . ?
SiB C8 H8C 112.2(7) . . ?
H8A C8 H8C 108.8(9) . . ?
H8B C8 H8C 107.8(9) . . ?
NB C11 C12 124.2(3) . . ?
NB C11 H11 116.1(4) . . ?
C12 C11 H11 119.7(4) . . ?
C11 C12 C13 117.6(3) . . ?
C11 C12 H12 119.8(6) . . ?
C13 C12 H12 122.6(5) . . ?
C14 C13 C12 119.7(3) . . ?
C14 C13 H13 120.7(6) . . ?
C12 C13 H13 119.6(5) . . ?
C13 C14 C15 119.8(3) . . ?
C13 C14 H14 120.8(5) . . ?
C15 C14 H14 119.4(5) . . ?
NB C15 N4 116.9(3) . . ?
NB C15 C14 121.0(3) . . ?
N4 C15 C14 122.1(3) . . ?
N4 C16 H16A 111.8(6) . . ?
N4 C16 H16B 108.7(6) . . ?
H16A C16 H16B 107.8(9) . . ?
N4 C16 H16C 110.9(6) . . ?
H16A C16 H16C 110.4(9) . . ?
H16B C16 H16C 107.0(9) . . ?
SiC C17 H17A 112.0(5) . . ?
SiC C17 H17B 111.0(6) . . ?
H17A C17 H17B 106.7(9) . . ?
SiC C17 H17C 111.7(6) . . ?
H17A C17 H17C 107.5(9) . . ?
H17B C17 H17C 107.7(9) . . ?
SiC C18 H18A 110.0(5) . . ?
SiC C18 H18B 112.2(5) . . ?
H18A C18 H18B 108.8(8) . . ?
SiC C18 H18C 110.1(7) . . ?
H18A C18 H18C 107.6(8) . . ?
H18B C18 H18C 108.1(8) . . ?
NC C21 C22 122.8(3) . . ?
NC C21 H21 116.4(5) . . ?
C22 C21 H21 120.8(5) . . ?
C21 C22 C23 118.7(3) . . ?
C21 C22 H22 120.1(6) . . ?
C23 C22 H22 121.2(6) . . ?
C24 C23 C22 119.3(3) . . ?
C24 C23 H23 118.9(6) . . ?
C22 C23 H23 121.8(6) . . ?
C23 C24 C25 119.5(3) . . ?
C23 C24 H24 120.1(6) . . ?
C25 C24 H24 120.4(5) . . ?
NC C25 N6 117.8(3) . . ?
NC C25 C24 120.6(3) . . ?
N6 C25 C24 121.6(3) . . ?
N6 C26 H26A 110.6(6) . . ?
N6 C26 H26B 108.9(6) . . ?
H26A C26 H26B 106.0(10) . . ?
N6 C26 H26C 111.9(6) . . ?
H26A C26 H26C 111.7(9) . . ?
H26B C26 H26C 107.4(9) . . ?
SiA C27 H27A 113.5(8) . . ?
SiA C27 H27B 110.7(7) . . ?
H27A C27 H27B 107.5(9) . . ?
SiA C27 H27C 111.4(6) . . ?
H27A C27 H27C 106.9(10) . . ?
H27B C27 H27C 106.4(9) . . ?
SiA C28 H28A 111.9(7) . . ?
SiA C28 H28B 109.3(5) . . ?
H28A C28 H28B 107.3(9) . . ?
SiA C28 H28C 113.1(6) . . ?
H28A C28 H28C 106.4(9) . . ?
H28B C28 H28C 108.6(10) . . ?
C1 NA C5 118.7(3) . . ?
C1 NA Ru1 120.33(19) . . ?
C5 NA Ru1 120.7(2) . . ?
C1 NA N2 149.70(19) . . ?
C5 NA N2 31.03(17) . . ?
Ru1 NA N2 89.79(13) . . ?
C11 NB C15 117.8(2) . . ?
C11 NB Ru1 121.4(2) . . ?
C15 NB Ru1 120.16(19) . . ?
C11 NB N4 149.4(2) . . ?
C15 NB N4 31.60(15) . . ?
Ru1 NB N4 88.75(12) . . ?
C21 NC C25 118.8(3) . . ?
C21 NC Ru1 120.2(2) . . ?
C25 NC Ru1 120.7(2) . . ?
C21 NC N6 149.9(2) . . ?
C25 NC N6 31.13(16) . . ?
Ru1 NC N6 89.93(13) . . ?
C5 N2 C6 118.4(3) . . ?
C5 N2 SiB 123.0(2) . . ?
C6 N2 SiB 118.6(3) . . ?
C5 N2 NA 31.23(14) . . ?
C6 N2 NA 149.6(2) . . ?
SiB N2 NA 91.8(2) . . ?
C5 N2 Ru1 74.17(15) . . ?
C6 N2 Ru1 167.1(2) . . ?
SiB N2 Ru1 48.89(19) . . ?
NA N2 Ru1 42.98(9) . . ?
C15 N4 C16 118.0(3) . . ?
C15 N4 SiC 120.9(3) . . ?
C16 N4 SiC 118.3(3) . . ?
C15 N4 NB 31.48(16) . . ?
C16 N4 NB 149.5(2) . . ?
SiC N4 NB 91.2(2) . . ?
C15 N4 Ru1 75.83(18) . . ?
C16 N4 Ru1 166.0(2) . . ?
SiC N4 Ru1 47.91(18) . . ?
NB N4 Ru1 44.47(9) . . ?
C25 N6 C26 118.2(3) . . ?
C25 N6 SiA 123.1(3) . . ?
C26 N6 SiA 118.7(3) . . ?
C25 N6 NC 31.06(16) . . ?
C26 N6 NC 149.2(2) . . ?
SiA N6 NC 92.1(2) . . ?
C25 N6 Ru1 74.95(18) . . ?
C26 N6 Ru1 165.0(2) . . ?
SiA N6 Ru1 48.77(18) . . ?
NC N6 Ru1 44.11(9) . . ?
N6 SiA C27 107.6(3) . . ?
N6 SiA C28 107.2(3) . . ?
C27 SiA C28 106.3(3) . . ?
N6 SiA Ru1 98.5(2) . . ?
C27 SiA Ru1 118.5(2) . . ?
C28 SiA Ru1 117.4(3) . . ?
N6 SiA HA 137.6(4) . . ?
C27 SiA HA 103.8(4) . . ?
C28 SiA HA 90.1(4) . . ?
Ru1 SiA HA 40.4(3) . . ?
N2 SiB C8 105.9(3) . . ?
N2 SiB C7 105.2(3) . . ?
C8 SiB C7 105.5(3) . . ?
N2 SiB Ru1 97.3(3) . . ?
C8 SiB Ru1 119.0(2) . . ?
C7 SiB Ru1 121.7(3) . . ?
N2 SiB HB 96.8(4) . . ?
C8 SiB HB 152.5(4) . . ?
C7 SiB HB 82.8(3) . . ?
Ru1 SiB HB 41.0(2) . . ?
N4 SiC C18 106.9(3) . . ?
N4 SiC C17 107.8(3) . . ?
C18 SiC C17 109.4(3) . . ?
N4 SiC Ru1 99.0(2) . . ?
C18 SiC Ru1 115.7(3) . . ?
C17 SiC Ru1 116.8(3) . . ?
N4 SiC HB 139.6(4) . . ?
C18 SiC HB 98.6(4) . . ?
C17 SiC HB 91.9(3) . . ?
Ru1 SiC HB 41.0(2) . . ?
NA Ru1 NB 92.92(15) . . ?
NA Ru1 NC 87.14(13) . . ?
NB Ru1 NC 87.19(13) . . ?
NA Ru1 SiC 85.95(17) . . ?
NB Ru1 SiC 78.96(17) . . ?
NC Ru1 SiC 164.2(2) . . ?
NA Ru1 SiB 80.97(16) . . ?
NB Ru1 SiB 169.9(2) . . ?
NC Ru1 SiB 84.46(16) . . ?
SiC Ru1 SiB 108.45(19) . . ?
NA Ru1 SiA 162.8(2) . . ?
NB Ru1 SiA 95.06(16) . . ?
NC Ru1 SiA 78.05(16) . . ?
SiC Ru1 SiA 110.5(2) . . ?
SiB Ru1 SiA 88.8(2) . . ?
NA Ru1 N2 47.23(9) . . ?
NB Ru1 N2 139.89(15) . . ?
NC Ru1 N2 86.45(11) . . ?
SiC Ru1 N2 99.18(14) . . ?
SiB Ru1 N2 33.84(14) . . ?
SiA Ru1 N2 122.08(18) . . ?
NA Ru1 N4 82.04(12) . . ?
NB Ru1 N4 46.78(9) . . ?
NC Ru1 N4 131.54(14) . . ?
SiC Ru1 N4 33.13(14) . . ?
SiB Ru1 N4 138.97(16) . . ?
SiA Ru1 N4 114.39(16) . . ?
N2 Ru1 N4 117.33(10) . . ?
NA Ru1 N6 130.90(14) . . ?
NB Ru1 N6 97.42(11) . . ?
NC Ru1 N6 45.97(9) . . ?
SiC Ru1 N6 143.13(17) . . ?
SiB Ru1 N6 80.83(15) . . ?
SiA Ru1 N6 32.71(13) . . ?
N2 Ru1 N6 106.08(11) . . ?
N4 Ru1 N6 136.53(10) . . ?
NA Ru1 HA 152.2(3) . . ?
NB Ru1 HA 80.7(4) . . ?
NC Ru1 HA 119.3(3) . . ?
SiC Ru1 HA 66.3(3) . . ?
SiB Ru1 HA 108.4(4) . . ?
SiA Ru1 HA 44.7(3) . . ?
N2 Ru1 HA 135.7(4) . . ?
N4 Ru1 HA 73.9(4) . . ?
N6 Ru1 HA 76.9(3) . . ?
NA Ru1 HB 89.4(3) . . ?
NB Ru1 HB 134.6(4) . . ?
NC Ru1 HB 138.2(4) . . ?
SiC Ru1 HB 55.9(3) . . ?
SiB Ru1 HB 53.9(3) . . ?
SiA Ru1 HB 95.7(4) . . ?
N2 Ru1 HB 61.8(3) . . ?
N4 Ru1 HB 88.9(3) . . ?
N6 Ru1 HB 114.7(4) . . ?
HA Ru1 HB 76.6(4) . . ?
C56 C51 C52 116.1(3) . . ?
C56 C51 B1 123.2(2) . . ?
C52 C51 B1 120.3(3) . . ?
C53 C52 C51 122.3(3) . . ?
C53 C52 H52 118.1(4) . . ?
C51 C52 H52 119.5(4) . . ?
C52 C53 C54 120.7(3) . . ?
C52 C53 C57 120.4(3) . . ?
C54 C53 C57 118.9(3) . . ?
C55 C54 C53 117.8(3) . . ?
C55 C54 H54 121.3(5) . . ?
C53 C54 H54 120.9(5) . . ?
C54 C55 C56 120.7(3) . . ?
C54 C55 C58 118.5(3) . . ?
C56 C55 C58 120.8(3) . . ?
C55 C56 C51 122.4(3) . . ?
C55 C56 H56 118.0(5) . . ?
C51 C56 H56 119.6(5) . . ?
F2 C57 F3 107.1(4) . . ?
F2 C57 F1 107.4(4) . . ?
F3 C57 F1 105.8(3) . . ?
F2 C57 C53 112.8(3) . . ?
F3 C57 C53 111.4(3) . . ?
F1 C57 C53 112.0(3) . . ?
F5 C58 F6 106.8(3) . . ?
F5 C58 F4 106.9(3) . . ?
F6 C58 F4 106.4(4) . . ?
F5 C58 C55 112.4(3) . . ?
F6 C58 C55 112.1(3) . . ?
F4 C58 C55 111.9(3) . . ?
C62 C61 C66 116.0(3) . . ?
C62 C61 B1 123.2(3) . . ?
C66 C61 B1 120.2(3) . . ?
C63 C62 C61 122.2(3) . . ?
C63 C62 H62 117.3(5) . . ?
C61 C62 H62 120.6(5) . . ?
C64 C63 C62 120.9(3) . . ?
C64 C63 C67 120.6(3) . . ?
C62 C63 C67 118.5(3) . . ?
C63 C64 C65 118.0(3) . . ?
C63 C64 H64 121.4(5) . . ?
C65 C64 H64 120.6(5) . . ?
C64 C65 C66 120.5(3) . . ?
C64 C65 C68 120.6(3) . . ?
C66 C65 C68 118.9(3) . . ?
C65 C66 C61 122.4(3) . . ?
C65 C66 H66 118.2(5) . . ?
C61 C66 H66 119.4(5) . . ?
F9 C67 F8 106.9(4) . . ?
F9 C67 F7 106.5(3) . . ?
F8 C67 F7 106.7(4) . . ?
F9 C67 C63 113.2(3) . . ?
F8 C67 C63 111.9(3) . . ?
F7 C67 C63 111.2(4) . . ?
F12 C68 F10 107.5(4) . . ?
F12 C68 F11 106.8(4) . . ?
F10 C68 F11 106.6(4) . . ?
F12 C68 C65 112.5(3) . . ?
F10 C68 C65 111.7(3) . . ?
F11 C68 C65 111.4(3) . . ?
C72 C71 C76 116.4(3) . . ?
C72 C71 B1 124.0(3) . . ?
C76 C71 B1 119.3(3) . . ?
C73 C72 C71 121.9(3) . . ?
C73 C72 H72 118.1(6) . . ?
C71 C72 H72 120.0(5) . . ?
C72 C73 C74 121.4(3) . . ?
C72 C73 C77 118.8(3) . . ?
C74 C73 C77 119.8(3) . . ?
C75 C74 C73 117.8(3) . . ?
C75 C74 H74 120.8(6) . . ?
C73 C74 H74 121.4(6) . . ?
C74 C75 C76 120.8(3) . . ?
C74 C75 C78 120.0(3) . . ?
C76 C75 C78 119.2(3) . . ?
C75 C76 C71 121.8(3) . . ?
C75 C76 H76 119.3(6) . . ?
C71 C76 H76 118.9(6) . . ?
F14 C77 F13 107.1(4) . . ?
F14 C77 F15 107.2(3) . . ?
F13 C77 F15 107.0(3) . . ?
F14 C77 C73 110.9(3) . . ?
F13 C77 C73 111.6(3) . . ?
F15 C77 C73 112.7(3) . . ?
F16 C78 F18 107.0(4) . . ?
F16 C78 F17 106.7(4) . . ?
F18 C78 F17 106.8(5) . . ?
F16 C78 C75 113.0(4) . . ?
F18 C78 C75 112.4(3) . . ?
F17 C78 C75 110.6(3) . . ?
C86 C81 C82 116.1(3) . . ?
C86 C81 B1 124.0(3) . . ?
C82 C81 B1 119.9(3) . . ?
C83 C82 C81 122.4(3) . . ?
C83 C82 H82 118.5(6) . . ?
C81 C82 H82 119.1(5) . . ?
C84 C83 C82 120.5(3) . . ?
C84 C83 C87 122.0(3) . . ?
C82 C83 C87 117.4(3) . . ?
C85 C84 C83 118.0(3) . . ?
C85 C84 H84 121.8(5) . . ?
C83 C84 H84 120.2(6) . . ?
C84 C85 C86 121.0(3) . . ?
C84 C85 C88 120.2(3) . . ?
C86 C85 C88 118.8(3) . . ?
C81 C86 C85 121.8(3) . . ?
C81 C86 H86 119.1(4) . . ?
C85 C86 H86 119.1(4) . . ?
F19 C87 F20 107.6(3) . . ?
F19 C87 F21 107.3(4) . . ?
F20 C87 F21 106.4(3) . . ?
F19 C87 C83 112.4(3) . . ?
F20 C87 C83 112.0(3) . . ?
F21 C87 C83 110.8(3) . . ?
F23 C88 F24 106.9(3) . . ?
F23 C88 F22 106.3(3) . . ?
F24 C88 F22 105.9(4) . . ?
F23 C88 C85 113.2(4) . . ?
F24 C88 C85 112.4(3) . . ?
F22 C88 C85 111.7(3) . . ?
C61 B1 C71 112.6(3) . . ?
C61 B1 C81 114.4(3) . . ?
C71 B1 C81 103.7(2) . . ?
C61 B1 C51 102.7(2) . . ?
C71 B1 C51 113.2(3) . . ?
C81 B1 C51 110.5(3) . . ?
 
loop_
 _geom_torsion_atom_site_label_1
 _geom_torsion_atom_site_label_2
 _geom_torsion_atom_site_label_3
 _geom_torsion_atom_site_label_4
 _geom_torsion
 _geom_torsion_site_symmetry_1
 _geom_torsion_site_symmetry_2
 _geom_torsion_site_symmetry_3
 _geom_torsion_site_symmetry_4
 _geom_torsion_publ_flag
NA C1 C2 C3 -0.8(5) . . . . ?
C1 C2 C3 C4 0.8(5) . . . . ?
C2 C3 C4 C5 -0.1(5) . . . . ?
C3 C4 C5 N2 178.7(3) . . . . ?
C3 C4 C5 NA -0.7(5) . . . . ?
NB C11 C12 C13 0.2(6) . . . . ?
C11 C12 C13 C14 -0.5(5) . . . . ?
C12 C13 C14 C15 1.4(6) . . . . ?
C13 C14 C15 NB -2.0(5) . . . . ?
C13 C14 C15 N4 178.1(3) . . . . ?
NC C21 C22 C23 0.3(5) . . . . ?
C21 C22 C23 C24 -2.6(5) . . . . ?
C22 C23 C24 C25 1.3(5) . . . . ?
C23 C24 C25 NC 2.3(5) . . . . ?
C23 C24 C25 N6 -178.9(3) . . . . ?
C2 C1 NA C5 0.0(5) . . . . ?
C2 C1 NA Ru1 -174.4(3) . . . . ?
C2 C1 NA N2 -1.4(6) . . . . ?
N2 C5 NA C1 -178.7(3) . . . . ?
C4 C5 NA C1 0.7(4) . . . . ?
N2 C5 NA Ru1 -4.3(4) . . . . ?
C4 C5 NA Ru1 175.1(2) . . . . ?
C4 C5 NA N2 179.4(5) . . . . ?
C12 C11 NB C15 -0.8(5) . . . . ?
C12 C11 NB Ru1 -172.1(3) . . . . ?
C12 C11 NB N4 -2.4(7) . . . . ?
N4 C15 NB C11 -178.4(3) . . . . ?
C14 C15 NB C11 1.7(5) . . . . ?
N4 C15 NB Ru1 -7.0(4) . . . . ?
C14 C15 NB Ru1 173.1(3) . . . . ?
C14 C15 NB N4 -179.9(5) . . . . ?
C22 C21 NC C25 3.3(4) . . . . ?
C22 C21 NC Ru1 -170.7(3) . . . . ?
C22 C21 NC N6 6.8(6) . . . . ?
N6 C25 NC C21 176.6(3) . . . . ?
C24 C25 NC C21 -4.6(4) . . . . ?
N6 C25 NC Ru1 -9.5(4) . . . . ?
C24 C25 NC Ru1 169.3(2) . . . . ?
C24 C25 NC N6 178.8(5) . . . . ?
NA C5 N2 C6 179.5(3) . . . . ?
C4 C5 N2 C6 0.1(4) . . . . ?
NA C5 N2 SiB -0.3(4) . . . . ?
C4 C5 N2 SiB -179.7(3) . . . . ?
C4 C5 N2 NA -179.4(5) . . . . ?
NA C5 N2 Ru1 2.6(2) . . . . ?
C4 C5 N2 Ru1 -176.8(3) . . . . ?
C1 NA N2 C5 2.3(5) . . . . ?
Ru1 NA N2 C5 176.3(3) . . . . ?
C1 NA N2 C6 1.4(7) . . . . ?
C5 NA N2 C6 -0.9(5) . . . . ?
Ru1 NA N2 C6 175.4(4) . . . . ?
C1 NA N2 SiB -178.0(4) . . . . ?
C5 NA N2 SiB 179.7(4) . . . . ?
Ru1 NA N2 SiB -4.0(2) . . . . ?
C1 NA N2 Ru1 -174.0(4) . . . . ?
C5 NA N2 Ru1 -176.3(3) . . . . ?
NB C15 N4 C16 -177.8(3) . . . . ?
C14 C15 N4 C16 2.1(5) . . . . ?
NB C15 N4 SiC 21.3(4) . . . . ?
C14 C15 N4 SiC -158.8(3) . . . . ?
C14 C15 N4 NB 179.9(5) . . . . ?
NB C15 N4 Ru1 4.4(2) . . . . ?
C14 C15 N4 Ru1 -175.7(3) . . . . ?
C11 NB N4 C15 2.7(5) . . . . ?
Ru1 NB N4 C15 173.9(3) . . . . ?
C11 NB N4 C16 6.5(7) . . . . ?
C15 NB N4 C16 3.8(5) . . . . ?
Ru1 NB N4 C16 177.7(5) . . . . ?
C11 NB N4 SiC -159.1(5) . . . . ?
C15 NB N4 SiC -161.8(4) . . . . ?
Ru1 NB N4 SiC 12.1(2) . . . . ?
C11 NB N4 Ru1 -171.2(5) . . . . ?
C15 NB N4 Ru1 -173.9(3) . . . . ?
NC C25 N6 C26 178.0(3) . . . . ?
C24 C25 N6 C26 -0.8(5) . . . . ?
NC C25 N6 SiA -2.3(4) . . . . ?
C24 C25 N6 SiA 178.9(3) . . . . ?
C24 C25 N6 NC -178.8(5) . . . . ?
NC C25 N6 Ru1 5.9(2) . . . . ?
C24 C25 N6 Ru1 -172.9(3) . . . . ?
C21 NC N6 C25 -6.0(5) . . . . ?
Ru1 NC N6 C25 171.8(3) . . . . ?
C21 NC N6 C26 -9.4(7) . . . . ?
C25 NC N6 C26 -3.4(5) . . . . ?
Ru1 NC N6 C26 168.4(4) . . . . ?
C21 NC N6 SiA 172.1(4) . . . . ?
C25 NC N6 SiA 178.1(4) . . . . ?
Ru1 NC N6 SiA -10.1(2) . . . . ?
C21 NC N6 Ru1 -177.8(5) . . . . ?
C25 NC N6 Ru1 -171.8(3) . . . . ?
C25 N6 SiA C27 134.1(3) . . . . ?
C26 N6 SiA C27 -46.2(4) . . . . ?
NC N6 SiA C27 133.0(2) . . . . ?
Ru1 N6 SiA C27 123.7(3) . . . . ?
C25 N6 SiA C28 -111.8(3) . . . . ?
C26 N6 SiA C28 67.9(4) . . . . ?
NC N6 SiA C28 -113.0(3) . . . . ?
Ru1 N6 SiA C28 -122.3(4) . . . . ?
C25 N6 SiA Ru1 10.5(4) . . . . ?
C26 N6 SiA Ru1 -169.8(2) . . . . ?
NC N6 SiA Ru1 9.3(2) . . . . ?
C5 N2 SiB C8 -119.2(3) . . . . ?
C6 N2 SiB C8 61.0(4) . . . . ?
NA N2 SiB C8 -119.3(3) . . . . ?
Ru1 N2 SiB C8 -122.9(3) . . . . ?
C5 N2 SiB C7 129.4(3) . . . . ?
C6 N2 SiB C7 -50.4(4) . . . . ?
NA N2 SiB C7 129.3(3) . . . . ?
Ru1 N2 SiB C7 125.7(4) . . . . ?
C5 N2 SiB Ru1 3.8(3) . . . . ?
C6 N2 SiB Ru1 -176.0(2) . . . . ?
NA N2 SiB Ru1 3.59(18) . . . . ?
C15 N4 SiC C18 98.0(3) . . . . ?
C16 N4 SiC C18 -62.8(3) . . . . ?
NB N4 SiC C18 109.0(2) . . . . ?
Ru1 N4 SiC C18 120.4(3) . . . . ?
C15 N4 SiC C17 -144.4(3) . . . . ?
C16 N4 SiC C17 54.8(4) . . . . ?
NB N4 SiC C17 -133.5(3) . . . . ?
Ru1 N4 SiC C17 -122.0(4) . . . . ?
C15 N4 SiC Ru1 -22.4(3) . . . . ?
C16 N4 SiC Ru1 176.8(2) . . . . ?
NB N4 SiC Ru1 -11.46(18) . . . . ?
C1 NA Ru1 NB -8.7(2) . . . . ?
C5 NA Ru1 NB 177.1(2) . . . . ?
N2 NA Ru1 NB 174.84(12) . . . . ?
C1 NA Ru1 NC -95.7(2) . . . . ?
C5 NA Ru1 NC 90.0(2) . . . . ?
N2 NA Ru1 NC 87.81(12) . . . . ?
C1 NA Ru1 SiC 70.0(3) . . . . ?
C5 NA Ru1 SiC -104.2(3) . . . . ?
N2 NA Ru1 SiC -106.45(16) . . . . ?
C1 NA Ru1 SiB 179.5(2) . . . . ?
C5 NA Ru1 SiB 5.2(3) . . . . ?
N2 NA Ru1 SiB 2.97(15) . . . . ?
C1 NA Ru1 SiA -126.2(6) . . . . ?
C5 NA Ru1 SiA 59.5(7) . . . . ?
N2 NA Ru1 SiA 57.3(7) . . . . ?
C1 NA Ru1 N2 176.5(3) . . . . ?
C5 NA Ru1 N2 2.21(19) . . . . ?
C1 NA Ru1 N4 37.0(2) . . . . ?
C5 NA Ru1 N4 -137.3(2) . . . . ?
N2 NA Ru1 N4 -139.55(10) . . . . ?
C1 NA Ru1 N6 -111.1(3) . . . . ?
C5 NA Ru1 N6 74.6(3) . . . . ?
N2 NA Ru1 N6 72.41(18) . . . . ?
C11 NB Ru1 NA -109.0(2) . . . . ?
C15 NB Ru1 NA 79.9(2) . . . . ?
N4 NB Ru1 NA 76.21(13) . . . . ?
C11 NB Ru1 NC -22.0(3) . . . . ?
C15 NB Ru1 NC 166.9(2) . . . . ?
N4 NB Ru1 NC 163.20(12) . . . . ?
C11 NB Ru1 SiC 165.7(3) . . . . ?
C15 NB Ru1 SiC -5.4(3) . . . . ?
N4 NB Ru1 SiC -9.09(16) . . . . ?
C11 NB Ru1 SiB -56.4(11) . . . . ?
C15 NB Ru1 SiB 132.5(10) . . . . ?
N4 NB Ru1 SiB 128.8(11) . . . . ?
C11 NB Ru1 SiA 55.7(3) . . . . ?
C15 NB Ru1 SiA -115.4(3) . . . . ?
N4 NB Ru1 SiA -119.06(16) . . . . ?
C11 NB Ru1 N2 -103.1(3) . . . . ?
C15 NB Ru1 N2 85.8(3) . . . . ?
N4 NB Ru1 N2 82.1(2) . . . . ?
C11 NB Ru1 N4 174.8(3) . . . . ?
C15 NB Ru1 N4 3.67(19) . . . . ?
C11 NB Ru1 N6 22.9(3) . . . . ?
C15 NB Ru1 N6 -148.2(2) . . . . ?
N4 NB Ru1 N6 -151.89(11) . . . . ?
C21 NC Ru1 NA 14.9(3) . . . . ?
C25 NC Ru1 NA -158.9(2) . . . . ?
N6 NC Ru1 NA -163.79(13) . . . . ?
C21 NC Ru1 NB -78.1(2) . . . . ?
C25 NC Ru1 NB 108.0(2) . . . . ?
N6 NC Ru1 NB 103.14(12) . . . . ?
C21 NC Ru1 SiC -49.3(7) . . . . ?
C25 NC Ru1 SiC 136.9(6) . . . . ?
N6 NC Ru1 SiC 132.0(6) . . . . ?
C21 NC Ru1 SiB 96.1(3) . . . . ?
C25 NC Ru1 SiB -77.7(3) . . . . ?
N6 NC Ru1 SiB -82.59(16) . . . . ?
C21 NC Ru1 SiA -173.9(3) . . . . ?
C25 NC Ru1 SiA 12.3(3) . . . . ?
N6 NC Ru1 SiA 7.36(16) . . . . ?
C21 NC Ru1 N2 62.2(2) . . . . ?
C25 NC Ru1 N2 -111.6(2) . . . . ?
N6 NC Ru1 N2 -116.49(11) . . . . ?
C21 NC Ru1 N4 -61.8(3) . . . . ?
C25 NC Ru1 N4 124.4(2) . . . . ?
N6 NC Ru1 N4 119.48(16) . . . . ?
C21 NC Ru1 N6 178.7(3) . . . . ?
C25 NC Ru1 N6 4.90(19) . . . . ?
N4 SiC Ru1 NA -81.6(2) . . . . ?
C18 SiC Ru1 NA 164.6(3) . . . . ?
C17 SiC Ru1 NA 33.6(3) . . . . ?
N4 SiC Ru1 NB 12.2(2) . . . . ?
C18 SiC Ru1 NB -101.6(3) . . . . ?
C17 SiC Ru1 NB 127.4(3) . . . . ?
N4 SiC Ru1 NC -17.3(7) . . . . ?
C18 SiC Ru1 NC -131.0(6) . . . . ?
C17 SiC Ru1 NC 98.0(6) . . . . ?
N4 SiC Ru1 SiB -160.7(2) . . . . ?
C18 SiC Ru1 SiB 85.5(3) . . . . ?
C17 SiC Ru1 SiB -45.5(4) . . . . ?
N4 SiC Ru1 SiA 103.5(3) . . . . ?
C18 SiC Ru1 SiA -10.3(3) . . . . ?
C17 SiC Ru1 SiA -141.3(3) . . . . ?
N4 SiC Ru1 N2 -127.12(19) . . . . ?
C18 SiC Ru1 N2 119.1(2) . . . . ?
C17 SiC Ru1 N2 -11.9(4) . . . . ?
C18 SiC Ru1 N4 -113.8(3) . . . . ?
C17 SiC Ru1 N4 115.2(4) . . . . ?
N4 SiC Ru1 N6 99.8(3) . . . . ?
C18 SiC Ru1 N6 -14.0(5) . . . . ?
C17 SiC Ru1 N6 -144.9(3) . . . . ?
N2 SiB Ru1 NA -3.9(2) . . . . ?
C8 SiB Ru1 NA 108.8(3) . . . . ?
C7 SiB Ru1 NA -116.8(3) . . . . ?
N2 SiB Ru1 NB -57.3(11) . . . . ?
C8 SiB Ru1 NB 55.4(12) . . . . ?
C7 SiB Ru1 NB -170.2(9) . . . . ?
N2 SiB Ru1 NC -91.9(2) . . . . ?
C8 SiB Ru1 NC 20.8(3) . . . . ?
C7 SiB Ru1 NC 155.3(3) . . . . ?
N2 SiB Ru1 SiC 78.7(3) . . . . ?
C8 SiB Ru1 SiC -168.6(3) . . . . ?
C7 SiB Ru1 SiC -34.1(4) . . . . ?
N2 SiB Ru1 SiA -170.0(2) . . . . ?
C8 SiB Ru1 SiA -57.3(3) . . . . ?
C7 SiB Ru1 SiA 77.1(3) . . . . ?
C8 SiB Ru1 N2 112.7(4) . . . . ?
C7 SiB Ru1 N2 -112.9(4) . . . . ?
N2 SiB Ru1 N4 62.7(3) . . . . ?
C8 SiB Ru1 N4 175.4(2) . . . . ?
C7 SiB Ru1 N4 -50.1(5) . . . . ?
N2 SiB Ru1 N6 -138.1(2) . . . . ?
C8 SiB Ru1 N6 -25.4(3) . . . . ?
C7 SiB Ru1 N6 109.0(3) . . . . ?
N6 SiA Ru1 NA 21.4(8) . . . . ?
C27 SiA Ru1 NA -94.0(7) . . . . ?
C28 SiA Ru1 NA 135.9(6) . . . . ?
N6 SiA Ru1 NB -95.9(2) . . . . ?
C27 SiA Ru1 NB 148.7(3) . . . . ?
C28 SiA Ru1 NB 18.7(3) . . . . ?
N6 SiA Ru1 NC -9.8(2) . . . . ?
C27 SiA Ru1 NC -125.3(3) . . . . ?
C28 SiA Ru1 NC 104.7(3) . . . . ?
N6 SiA Ru1 SiC -175.9(2) . . . . ?
C27 SiA Ru1 SiC 68.6(4) . . . . ?
C28 SiA Ru1 SiC -61.4(3) . . . . ?
N6 SiA Ru1 SiB 74.8(3) . . . . ?
C27 SiA Ru1 SiB -40.7(3) . . . . ?
C28 SiA Ru1 SiB -170.7(3) . . . . ?
N6 SiA Ru1 N2 68.2(3) . . . . ?
C27 SiA Ru1 N2 -47.2(4) . . . . ?
C28 SiA Ru1 N2 -177.3(2) . . . . ?
N6 SiA Ru1 N4 -140.2(2) . . . . ?
C27 SiA Ru1 N4 104.3(3) . . . . ?
C28 SiA Ru1 N4 -25.7(3) . . . . ?
C27 SiA Ru1 N6 -115.5(4) . . . . ?
C28 SiA Ru1 N6 114.5(4) . . . . ?
C5 N2 Ru1 NA -1.99(17) . . . . ?
C6 N2 Ru1 NA -169.4(9) . . . . ?
SiB N2 Ru1 NA 174.7(3) . . . . ?
C5 N2 Ru1 NB -10.0(3) . . . . ?
C6 N2 Ru1 NB -177.5(9) . . . . ?
SiB N2 Ru1 NB 166.7(3) . . . . ?
NA N2 Ru1 NB -8.01(19) . . . . ?
C5 N2 Ru1 NC -91.4(2) . . . . ?
C6 N2 Ru1 NC 101.2(9) . . . . ?
SiB N2 Ru1 NC 85.3(2) . . . . ?
NA N2 Ru1 NC -89.38(14) . . . . ?
C5 N2 Ru1 SiC 73.7(2) . . . . ?
C6 N2 Ru1 SiC -93.7(9) . . . . ?
SiB N2 Ru1 SiC -109.6(3) . . . . ?
NA N2 Ru1 SiC 75.71(19) . . . . ?
C5 N2 Ru1 SiB -176.7(3) . . . . ?
C6 N2 Ru1 SiB 15.8(9) . . . . ?
NA N2 Ru1 SiB -174.7(3) . . . . ?
C5 N2 Ru1 SiA -164.9(2) . . . . ?
C6 N2 Ru1 SiA 27.7(10) . . . . ?
SiB N2 Ru1 SiA 11.8(3) . . . . ?
NA N2 Ru1 SiA -162.9(2) . . . . ?
C5 N2 Ru1 N4 44.3(2) . . . . ?
C6 N2 Ru1 N4 -123.1(9) . . . . ?
SiB N2 Ru1 N4 -138.9(3) . . . . ?
NA N2 Ru1 N4 46.33(13) . . . . ?
C5 N2 Ru1 N6 -133.41(19) . . . . ?
C6 N2 Ru1 N6 59.1(9) . . . . ?
SiB N2 Ru1 N6 43.3(2) . . . . ?
NA N2 Ru1 N6 -131.42(15) . . . . ?
C15 N4 Ru1 NA -104.92(19) . . . . ?
C16 N4 Ru1 NA 83.1(9) . . . . ?
SiC N4 Ru1 NA 94.8(2) . . . . ?
NB N4 Ru1 NA -101.66(15) . . . . ?
C15 N4 Ru1 NB -3.26(17) . . . . ?
C16 N4 Ru1 NB -175.2(9) . . . . ?
SiC N4 Ru1 NB -163.5(3) . . . . ?
C15 N4 Ru1 NC -25.9(2) . . . . ?
C16 N4 Ru1 NC 162.1(9) . . . . ?
SiC N4 Ru1 NC 173.8(3) . . . . ?
NB N4 Ru1 NC -22.68(16) . . . . ?
C15 N4 Ru1 SiC 160.3(3) . . . . ?
C16 N4 Ru1 SiC -11.7(9) . . . . ?
NB N4 Ru1 SiC 163.5(3) . . . . ?
C15 N4 Ru1 SiB -171.2(3) . . . . ?
C16 N4 Ru1 SiB 16.8(10) . . . . ?
SiC N4 Ru1 SiB 28.5(3) . . . . ?
NB N4 Ru1 SiB -168.0(3) . . . . ?
C15 N4 Ru1 SiA 69.7(2) . . . . ?
C16 N4 Ru1 SiA -102.3(9) . . . . ?
SiC N4 Ru1 SiA -90.6(3) . . . . ?
NB N4 Ru1 SiA 72.95(18) . . . . ?
C15 N4 Ru1 N2 -137.3(2) . . . . ?
C16 N4 Ru1 N2 50.7(9) . . . . ?
SiC N4 Ru1 N2 62.4(2) . . . . ?
NB N4 Ru1 N2 -134.08(17) . . . . ?
C15 N4 Ru1 N6 39.5(2) . . . . ?
C16 N4 Ru1 N6 -132.4(9) . . . . ?
SiC N4 Ru1 N6 -120.7(3) . . . . ?
NB N4 Ru1 N6 42.78(17) . . . . ?
C25 N6 Ru1 NA 17.3(3) . . . . ?
C26 N6 Ru1 NA -135.1(8) . . . . ?
SiA N6 Ru1 NA -171.8(3) . . . . ?
NC N6 Ru1 NA 21.65(17) . . . . ?
C25 N6 Ru1 NB -83.1(2) . . . . ?
C26 N6 Ru1 NB 124.5(8) . . . . ?
SiA N6 Ru1 NB 87.8(3) . . . . ?
NC N6 Ru1 NB -78.77(14) . . . . ?
C25 N6 Ru1 NC -4.35(18) . . . . ?
C26 N6 Ru1 NC -156.7(9) . . . . ?
SiA N6 Ru1 NC 166.6(3) . . . . ?
C25 N6 Ru1 SiC -164.6(3) . . . . ?
C26 N6 Ru1 SiC 43.0(9) . . . . ?
SiA N6 Ru1 SiC 6.3(4) . . . . ?
NC N6 Ru1 SiC -160.2(3) . . . . ?
C25 N6 Ru1 SiB 86.8(2) . . . . ?
C26 N6 Ru1 SiB -65.6(9) . . . . ?
SiA N6 Ru1 SiB -102.3(3) . . . . ?
NC N6 Ru1 SiB 91.15(17) . . . . ?
C25 N6 Ru1 SiA -170.9(3) . . . . ?
C26 N6 Ru1 SiA 36.7(8) . . . . ?
NC N6 Ru1 SiA -166.6(3) . . . . ?
C25 N6 Ru1 N2 64.0(2) . . . . ?
C26 N6 Ru1 N2 -88.3(8) . . . . ?
SiA N6 Ru1 N2 -125.0(3) . . . . ?
NC N6 Ru1 N2 68.39(13) . . . . ?
C25 N6 Ru1 N4 -113.1(2) . . . . ?
C26 N6 Ru1 N4 94.6(8) . . . . ?
SiA N6 Ru1 N4 57.9(3) . . . . ?
NC N6 Ru1 N4 -108.7(2) . . . . ?
C56 C51 C52 C53 1.5(5) . . . . ?
B1 C51 C52 C53 -170.8(3) . . . . ?
C51 C52 C53 C54 -3.2(5) . . . . ?
C51 C52 C53 C57 178.3(3) . . . . ?
C52 C53 C54 C55 1.8(5) . . . . ?
C57 C53 C54 C55 -179.8(3) . . . . ?
C53 C54 C55 C56 1.2(5) . . . . ?
C53 C54 C55 C58 -179.3(3) . . . . ?
C54 C55 C56 C51 -3.0(5) . . . . ?
C58 C55 C56 C51 177.6(3) . . . . ?
C52 C51 C56 C55 1.6(5) . . . . ?
B1 C51 C56 C55 173.7(3) . . . . ?
C52 C53 C57 F2 -19.9(5) . . . . ?
C54 C53 C57 F2 161.6(4) . . . . ?
C52 C53 C57 F3 -140.4(4) . . . . ?
C54 C53 C57 F3 41.2(5) . . . . ?
C52 C53 C57 F1 101.4(4) . . . . ?
C54 C53 C57 F1 -77.0(4) . . . . ?
C54 C55 C58 F5 -71.6(4) . . . . ?
C56 C55 C58 F5 107.9(4) . . . . ?
C54 C55 C58 F6 48.7(4) . . . . ?
C56 C55 C58 F6 -131.9(4) . . . . ?
C54 C55 C58 F4 168.1(4) . . . . ?
C56 C55 C58 F4 -12.5(5) . . . . ?
C66 C61 C62 C63 -0.5(4) . . . . ?
B1 C61 C62 C63 171.1(3) . . . . ?
C61 C62 C63 C64 0.3(5) . . . . ?
C61 C62 C63 C67 -179.0(3) . . . . ?
C62 C63 C64 C65 0.2(4) . . . . ?
C67 C63 C64 C65 179.4(3) . . . . ?
C63 C64 C65 C66 -0.4(5) . . . . ?
C63 C64 C65 C68 177.5(3) . . . . ?
C64 C65 C66 C61 0.2(5) . . . . ?
C68 C65 C66 C61 -177.7(3) . . . . ?
C62 C61 C66 C65 0.2(4) . . . . ?
B1 C61 C66 C65 -171.6(3) . . . . ?
C64 C63 C67 F9 3.5(4) . . . . ?
C62 C63 C67 F9 -177.2(3) . . . . ?
C64 C63 C67 F8 124.5(4) . . . . ?
C62 C63 C67 F8 -56.3(4) . . . . ?
C64 C63 C67 F7 -116.3(4) . . . . ?
C62 C63 C67 F7 62.9(4) . . . . ?
C64 C65 C68 F12 21.7(5) . . . . ?
C66 C65 C68 F12 -160.3(4) . . . . ?
C64 C65 C68 F10 142.7(3) . . . . ?
C66 C65 C68 F10 -39.3(4) . . . . ?
C64 C65 C68 F11 -98.1(4) . . . . ?
C66 C65 C68 F11 79.8(5) . . . . ?
C76 C71 C72 C73 1.1(4) . . . . ?
B1 C71 C72 C73 -172.0(3) . . . . ?
C71 C72 C73 C74 -2.0(5) . . . . ?
C71 C72 C73 C77 175.7(3) . . . . ?
C72 C73 C74 C75 0.8(4) . . . . ?
C77 C73 C74 C75 -176.9(3) . . . . ?
C73 C74 C75 C76 1.1(4) . . . . ?
C73 C74 C75 C78 -177.8(3) . . . . ?
C74 C75 C76 C71 -2.0(5) . . . . ?
C78 C75 C76 C71 176.9(3) . . . . ?
C72 C71 C76 C75 0.9(4) . . . . ?
B1 C71 C76 C75 174.3(3) . . . . ?
C72 C73 C77 F14 -71.9(4) . . . . ?
C74 C73 C77 F14 105.9(4) . . . . ?
C72 C73 C77 F13 47.4(4) . . . . ?
C74 C73 C77 F13 -134.8(3) . . . . ?
C72 C73 C77 F15 167.9(3) . . . . ?
C74 C73 C77 F15 -14.3(4) . . . . ?
C74 C75 C78 F16 -22.1(4) . . . . ?
C76 C75 C78 F16 159.0(3) . . . . ?
C74 C75 C78 F18 -143.3(4) . . . . ?
C76 C75 C78 F18 37.8(5) . . . . ?
C74 C75 C78 F17 97.4(5) . . . . ?
C76 C75 C78 F17 -81.5(5) . . . . ?
C86 C81 C82 C83 4.5(5) . . . . ?
B1 C81 C82 C83 -178.5(3) . . . . ?
C81 C82 C83 C84 -3.1(5) . . . . ?
C81 C82 C83 C87 175.9(3) . . . . ?
C82 C83 C84 C85 -0.7(5) . . . . ?
C87 C83 C84 C85 -179.6(3) . . . . ?
C83 C84 C85 C86 2.7(5) . . . . ?
C83 C84 C85 C88 -177.0(3) . . . . ?
C82 C81 C86 C85 -2.4(5) . . . . ?
B1 C81 C86 C85 -179.2(3) . . . . ?
C84 C85 C86 C81 -1.2(5) . . . . ?
C88 C85 C86 C81 178.5(3) . . . . ?
C84 C83 C87 F19 4.1(5) . . . . ?
C82 C83 C87 F19 -174.9(3) . . . . ?
C84 C83 C87 F20 -117.2(4) . . . . ?
C82 C83 C87 F20 63.8(4) . . . . ?
C84 C83 C87 F21 124.1(4) . . . . ?
C82 C83 C87 F21 -54.9(4) . . . . ?
C84 C85 C88 F23 -13.9(5) . . . . ?
C86 C85 C88 F23 166.4(3) . . . . ?
C84 C85 C88 F24 -135.1(4) . . . . ?
C86 C85 C88 F24 45.2(4) . . . . ?
C84 C85 C88 F22 106.0(4) . . . . ?
C86 C85 C88 F22 -73.7(4) . . . . ?
C62 C61 B1 C71 27.1(4) . . . . ?
C66 C61 B1 C71 -161.6(3) . . . . ?
C62 C61 B1 C81 145.3(3) . . . . ?
C66 C61 B1 C81 -43.5(4) . . . . ?
C62 C61 B1 C51 -95.0(3) . . . . ?
C66 C61 B1 C51 76.2(3) . . . . ?
C72 C71 B1 C61 -143.8(3) . . . . ?
C76 C71 B1 C61 43.3(4) . . . . ?
C72 C71 B1 C81 91.9(3) . . . . ?
C76 C71 B1 C81 -80.9(4) . . . . ?
C72 C71 B1 C51 -27.9(4) . . . . ?
C76 C71 B1 C51 159.3(3) . . . . ?
C86 C81 B1 C61 -25.2(4) . . . . ?
C82 C81 B1 C61 158.0(3) . . . . ?
C86 C81 B1 C71 97.8(4) . . . . ?
C82 C81 B1 C71 -78.9(4) . . . . ?
C86 C81 B1 C51 -140.5(3) . . . . ?
C82 C81 B1 C51 42.7(4) . . . . ?
C56 C51 B1 C61 -101.5(4) . . . . ?
C52 C51 B1 C61 70.3(4) . . . . ?
C56 C51 B1 C71 136.8(3) . . . . ?
C52 C51 B1 C71 -51.4(4) . . . . ?
C56 C51 B1 C81 21.0(5) . . . . ?
C52 C51 B1 C81 -167.3(3) . . . . ?
 
_diffrn_measured_fraction_theta_max    0.884
_diffrn_reflns_theta_full              61.29
_diffrn_measured_fraction_theta_full   0.884
_refine_diff_density_max    1.298
_refine_diff_density_min   -1.301
_refine_diff_density_rms    0.270

# END of Cif
